# Supplementary material
Source: publisher figshare collection journal article supplement (https://acs.figshare.com/ndownloader/files/8559247)
Supplement: Supplementary file 1 [file 8559247]

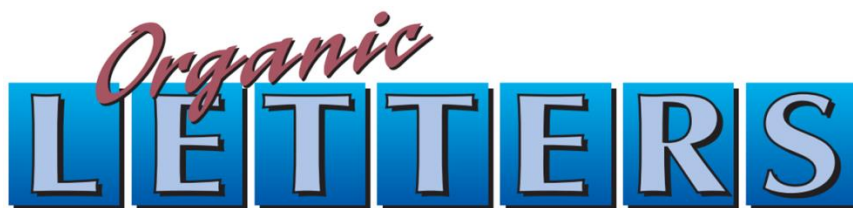

## **Supporting Information for**

### **Formal Total Synthesis of Actinoranone and Asymmetric Synthesis of Labda-7,13-(*E*)-dien-15-ol**

Luiz F. T. Novaes and Julio C. Pastre\*

*Institute of Chemistry, University of Campinas (UNICAMP), PO Box 6154, Zip Code  
13084-971, Campinas, SP, Brazil*

\*E-mail: juliopastre@iqm.unicamp.br

### **Table of Contents:**

|     |                                           |    |
|-----|-------------------------------------------|----|
| I.  | General Information                       | S2 |
| II. | Experimental procedures and spectral data | S3 |

## I. General Information.

Starting materials and reagents were obtained from commercial sources and used as received unless otherwise specified. Dichloromethane, triethylamine and pyridine were treated with calcium hydride and distilled before use. Tetrahydrofuran and diethylether were treated with metallic sodium and benzophenone and distilled before use. Anhydrous *N,N*-dimethylformamide, dimethylsulfoxide and diglyme were obtained from Aldrich. Anhydrous methanol, isopropyl alcohol, acetonitrile and toluene were dried over molecular sieves 3A (10% w/v) for more than one week before use. Anhydrous reactions were carried out with continuous stirring under atmosphere of dry nitrogen or argon. Progress of the reactions was monitored by thin-layer chromatography (TLC) analysis (Merck, silica gel 60 F254 on aluminum plates), unless otherwise stated. Flash chromatography purifications were performed with silica gel 60, 220-440 mesh, Sigma-Aldrich.  $^1\text{H}$  NMR and  $^{13}\text{C}$  NMR were recorded on Bruker 250, the chemical shifts ( $\delta$ ) were reported in parts per million (ppm) relative to deuterated solvent as the internal standard ( $\text{CDCl}_3$ : 7.26 ppm for  $^1\text{H}$  NMR and 77.0 ppm for  $^{13}\text{C}$  NMR), coupling constants ( $J$ ) are in hertz (Hz). The following abbreviations were used to designate chemical shift multiplicities: s = singlet, d = doublet, t = triplet, q = quartet, quint = quintet, m = multiplet, br. = broad signal. NMR spectra were processed using ACD/NMR Processor Academic Edition version 12.01. High resolution mass spectra (HRMS) were recorded on a Waters Xevo Q-ToF apparatus operating in electrospray mode (ES). Infrared spectra with Fourier transform (FTIR) were recorded on a Thermo Scientific Nicolet iS5, the principal absorptions are listed in  $\text{cm}^{-1}$ . Optical rotation were measured at 25 °C in a Perkin–Elmer 341 polarimeter, with sodium lamp, the measure is described as follow  $[\alpha]_{\text{D}}^{\text{T}}$  ( $c$  (g/100 mL), solvent). GC/MS analyses were carried out on an Agilent 9870A gas chromatography with quadrupole mass analyzer (GC-MS) equipped with a split/splitless injector; the column set for all runs consisted of a 30 m  $\times$  0.250 mm HP-5MS column; the oven temperature was increased from 60 to 180 °C at the rate of 20 °C/min and was then further increased to 280 °C at 30 °C/min; the injector and MS transfer lines were at 280 and 230 °C, respectively, and the MS ionization source was maintained at 230 °C using 70 eV; the spectrometer was operated with a mass scan range of 30-400  $m/z$ , resulting in an acquisition rate of 25 spectra/s; the data acquisitions were processed via the GC-MS 5975C data analysis. X-Ray analysis was performed on a Bruker Apex CCD Detector Diffractometer, the data were refined using the software Olex2 v 1.2, and the 3D structure was generated with the software Mercury 3.8. IUPAC names of the compounds were generated using ChemBioDraw Ultra 13.0.

## II. Experimental procedures and spectral data.

2-((1*R*,2*R*,4*aS*,8*aS*)-2-hydroxy-2,5,5,8*a*-tetramethyldecahydronaphthalen-1-yl)-*N*-methoxy-*N*-methylacetamide (**8**).

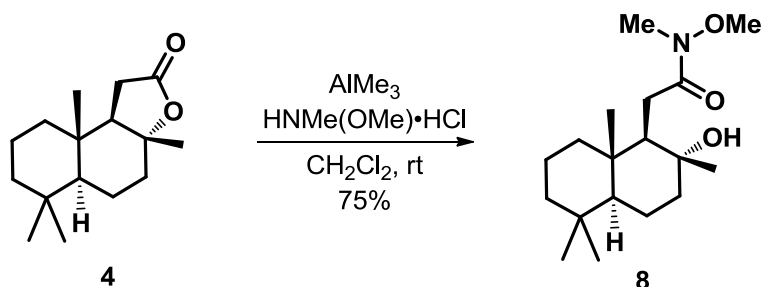

Me<sub>3</sub>Al (1 M in heptane, 8.0 mL, 8.0 mmol, 2 equiv) was added to a suspension of MeONHMe·HCl (756 mg, 7.7 mmol, 1 equiv) in dry CH<sub>2</sub>Cl<sub>2</sub> (20 mL) at 0 °C (**CAUTION!** *gas evolution*). After addition, the cooling bath was removed and the mixture was kept under magnetic stirring at room temperature for 2 h. Next, a solution of (+)-sclareolide (**4**, 97%, 1000 mg, 3.88 mmol, 1 equiv) in dry CH<sub>2</sub>Cl<sub>2</sub> (10 mL) was added to the reaction, and the stirring continued for 18 h at room temperature. After cooling to 0 °C, an aqueous solution of HCl (1 M, 30 mL) was slowly added (**CAUTION!** *gas evolution*). The organic phase was separated and the aqueous phase was extracted with CH<sub>2</sub>Cl<sub>2</sub> (2 x 25 mL). The organic phases were combined, dried over anhydrous Na<sub>2</sub>SO<sub>4</sub> and concentrated under reduced pressure. The residue was purified by flash chromatography (SiO<sub>2</sub>, hexanes/EtOAc 50:50 to 30:70) to furnish amide **8** (908 mg, 2.9 mmol) as a white solid in 75% yield.

**TLC** (SiO<sub>2</sub>): R<sub>f</sub> = 0.30 (hexanes/EtOAc 50:50);

**M.p.:** 102-106 °C;

[α]<sub>D</sub><sup>25</sup> = +37 (*c* 1.0, CHCl<sub>3</sub>), [α]<sub>D,lit</sub> = +39.3 (*c* 0.98, CHCl<sub>3</sub>);<sup>1</sup>

**<sup>1</sup>H NMR** (250 MHz, CDCl<sub>3</sub>): δ 0.78 (s, 3H), 0.81 (s, 3H), 0.86 (s, 3H), 1.14 (s, 3H), 0.89-1.73 (m, 10H), 1.86-2.03 (m, 2H), 2.37-2.63 (m, 3H), 3.17 (s, 3H), 3.71 (s, 3H);

**<sup>13</sup>C NMR** (62.9 MHz, CDCl<sub>3</sub>): δ 15.7 (CH<sub>3</sub>), 18.4 (CH<sub>2</sub>), 20.5 (CH<sub>2</sub>), 21.3 (CH<sub>3</sub>), 23.2 (CH<sub>3</sub>), 26.8 (CH<sub>2</sub>), 33.1 (C), 33.2 (2CH<sub>3</sub>), 38.5 (C), 39.2 (CH<sub>2</sub>), 41.7 (CH<sub>2</sub>), 44.4 (CH<sub>2</sub>), 55.8 (CH), 56.1 (CH), 61.1 (CH<sub>3</sub>), 72.7 (C), 176.0 (C).

<sup>1</sup> Kumar, C. N. S. S. P.; Chein, R.-J. *Org. Lett.* **2014**, *16*, 2990-2992.

|                        |                                                                                                      |                   |          |                        |                      |
|------------------------|------------------------------------------------------------------------------------------------------|-------------------|----------|------------------------|----------------------|
| Acquisition Time (sec) | 3.1654                                                                                               | Comment           | LN63     | Date                   | 07 Nov 2015 11:13:36 |
| Date Stamp             | 07 Nov 2015 11:13:36                                                                                 |                   |          |                        |                      |
| File Name              | \\nmrparc.lqm.unicamp.br\spectros\bruker250\2015\nov15\data\Julio Pastre\nmr\nov07\ftH1\1\PDATA\1\1r |                   |          |                        |                      |
| Frequency (MHz)        | 250.13                                                                                               | Nucleus           | 1H       | Number of Transients   | 17                   |
| Original Points Count  | 16384                                                                                                | Owner             | root     | Points Count           | 32768                |
| Receiver Gain          | 203.20                                                                                               | SW(cyclical) (Hz) | 5175.98  | Solvent                | CHLOROFORM-d         |
| Spectrum Offset (Hz)   | 1544.8082                                                                                            | Spectrum Type     | STANDARD | Sweep Width (Hz)       | 5175.83              |
|                        |                                                                                                      |                   |          | Temperature (degree C) | 25.160               |

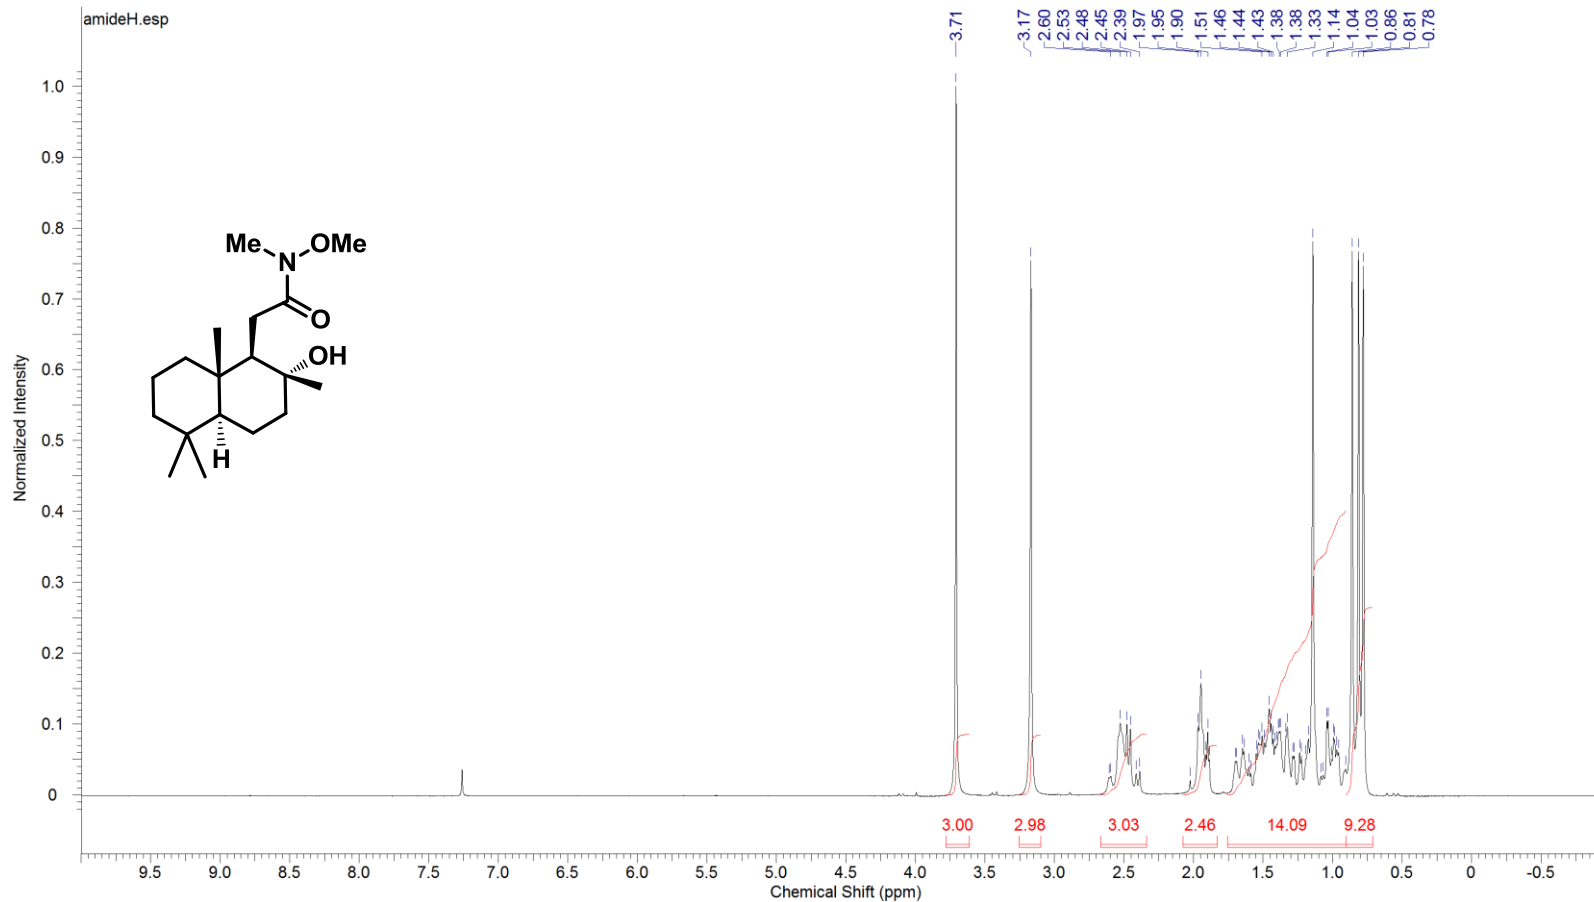

**Figure S1.**  $^1\text{H}$  NMR spectrum ( $\text{CDCl}_3$ , 250 MHz) of compound **8**.



|                        |                                                                                                       |                      |              |                        |                      |                       |           |
|------------------------|-------------------------------------------------------------------------------------------------------|----------------------|--------------|------------------------|----------------------|-----------------------|-----------|
| Acquisition Time (sec) | 1.0879                                                                                                | Comment              | LN78         | Date                   | 01 Dec 2015 14:29:52 |                       |           |
| Date Stamp             | 01 Dec 2015 14:29:52                                                                                  |                      |              |                        |                      |                       |           |
| File Name              | \\nmrsparc.lqm.unicamp.br\spectros\bruker250\2015\dez15\data\Julio Pastre\nmr\dez01\ftH1\2\PDATA\1\1r |                      |              | Frequency (MHz)        | 62.90                |                       |           |
| Nucleus                | <sup>13</sup> C                                                                                       | Number of Transients | 221          | Origin                 | spect                | Original Points Count | 16384     |
| Owner                  | root                                                                                                  | Points Count         | 32768        | Pulse Sequence         | zgpg30               | Receiver Gain         | 724.10    |
| SW(cyclical) (Hz)      | 15060.24                                                                                              | Solvent              | CHLOROFORM-d | Spectrum Offset (Hz)   |                      |                       | 6284.4756 |
| Spectrum Type          | STANDARD                                                                                              | Sweep Width (Hz)     | 15059.78     | Temperature (degree C) | 25.160               |                       |           |

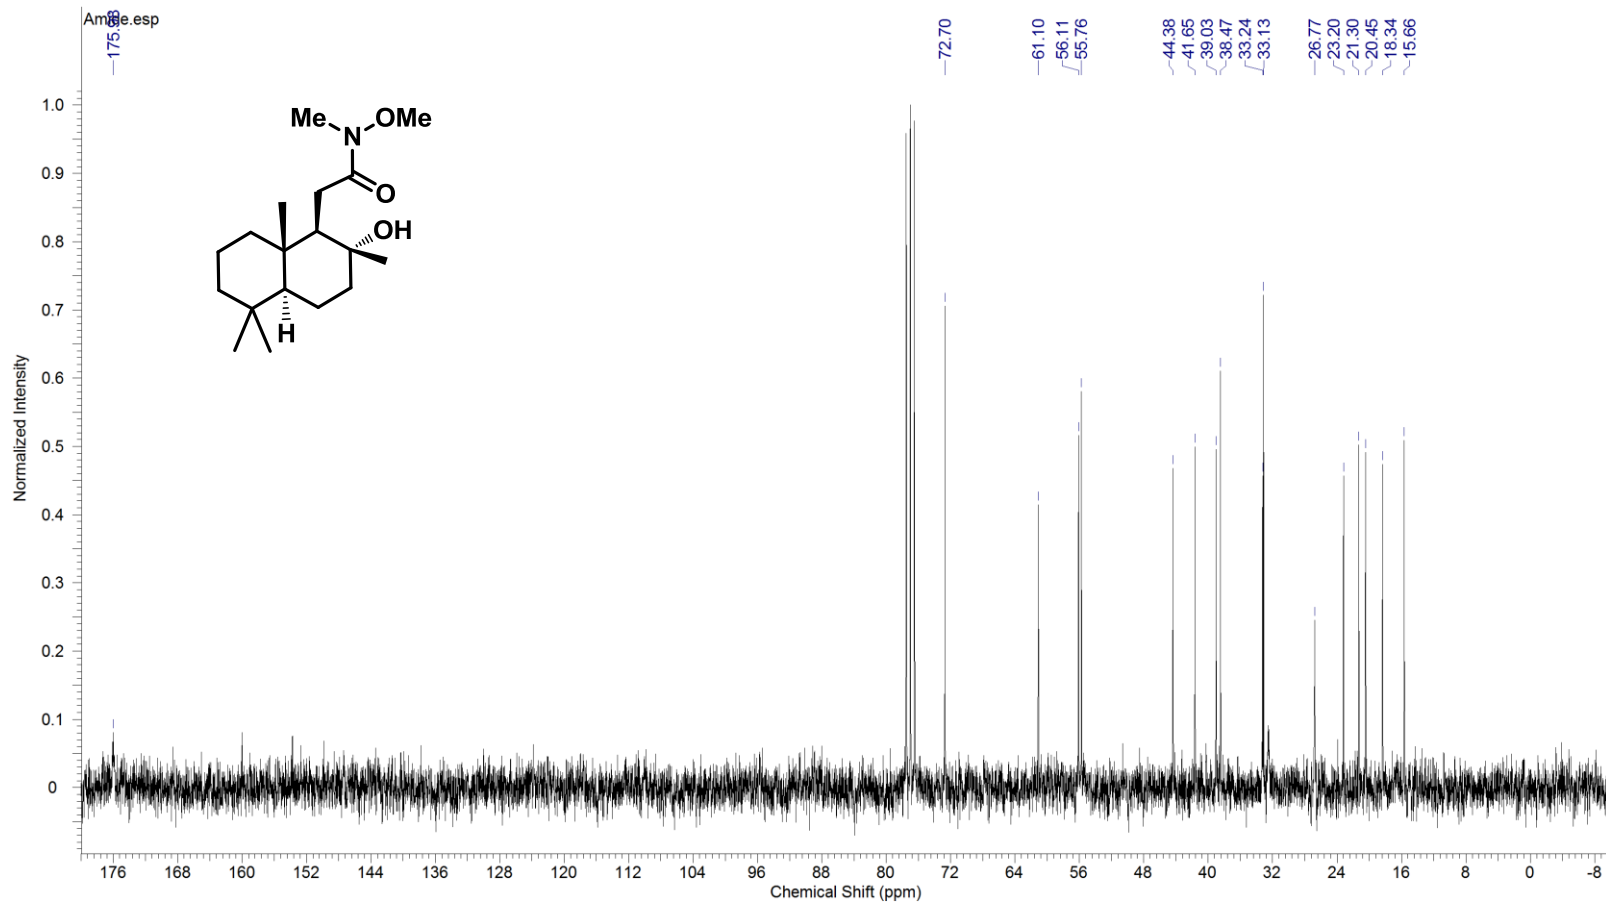

**Figure S2.** <sup>13</sup>C NMR spectrum (CDCl<sub>3</sub>, 62.9 MHz) of compound **8**.

|                        |                      |              |       |                      |                                                                      |               |          |                       |          |
|------------------------|----------------------|--------------|-------|----------------------|----------------------------------------------------------------------|---------------|----------|-----------------------|----------|
| Acquisition Time (sec) | 0.5439               | Comment      | LN63  | Date                 | 07 Nov 2015 11:15:44                                                 |               |          |                       |          |
| Date Stamp             | 07 Nov 2015 11:15:44 |              |       | File Name            | C:\Users\Luiz\AppData\Local\Temp\Rar\Ra0.941\nov07\ftH1\2\PDATA\1\1r |               |          |                       |          |
| Frequency (MHz)        | 62.90                | Nucleus      | 13C   | Number of Transients | 43                                                                   | Origin        | spect    | Original Points Count | 8192     |
| Owner                  | root                 | Points Count | 32768 | Pulse Sequence       | dept135                                                              | Receiver Gain | 16384.00 | SW(cyclical) (Hz)     | 15060.24 |
| Solvent                | CHLOROFORM-d         |              |       | Spectrum Offset (Hz) | 6289.0518                                                            | Spectrum Type | DEPT135  | Sweep Width (Hz)      | 15059.78 |
| Temperature (degree C) | 25.160               |              |       |                      |                                                                      |               |          |                       |          |

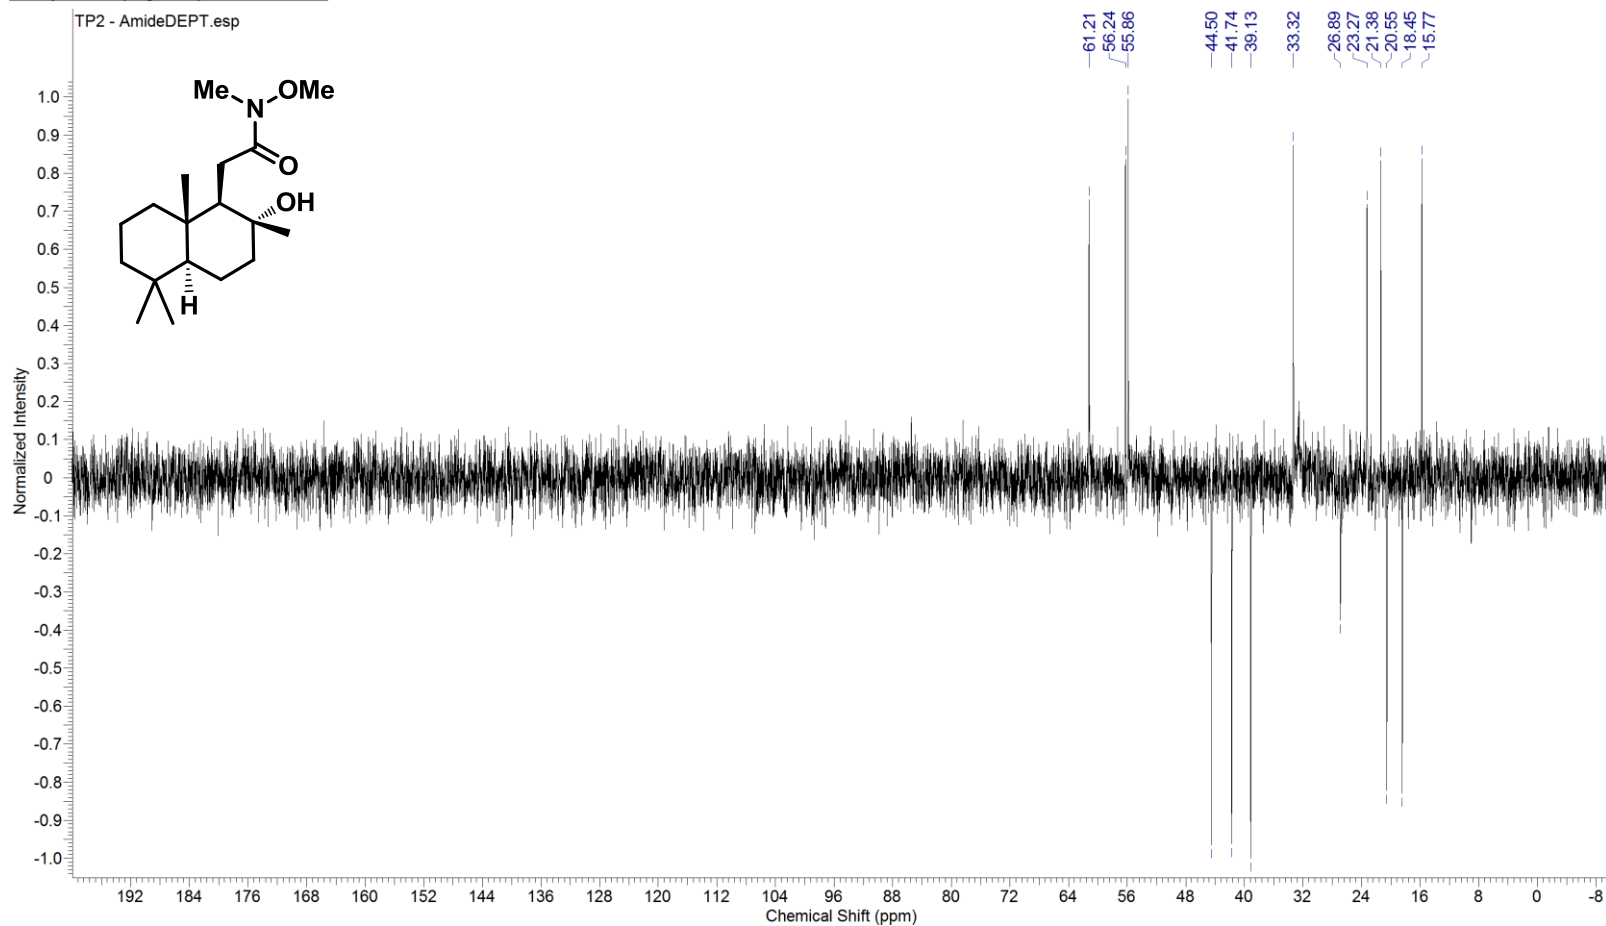

**Figure S3.** DEPT 135 NMR spectrum ( $\text{CDCl}_3$ , 62.9 MHz) of compound **8**.

(3a*S*,5a*S*,9a*S*,9b*R*)-3a,6,6,9a-tetramethyldecahydronaphtho[2,1-*b*]furan-2(3a*H*)-one (**10**).

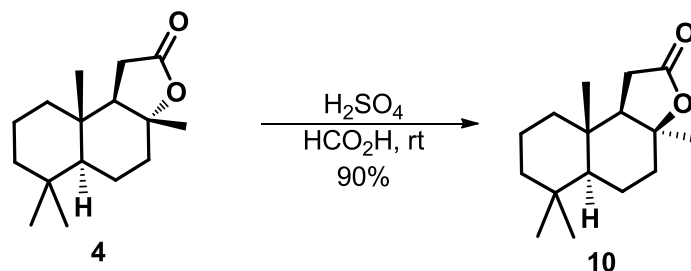

Solid (+)-sclareolide (**4**, 97%, 2.58 g, 10.0 mmol, 1 equiv) was added to a solution of sulfuric acid (95%, 1.68 mL, 30.0 mmol, 3 equiv) in formic acid (98%, 42 mL) at room temperature. After 4 h, the mixture was diluted with cold  $\text{H}_2\text{O}$  (100 mL) and extracted with  $\text{Et}_2\text{O}$  (2 x 100 mL). The combined organic phases were washed with saturated aqueous solution of  $\text{NaHCO}_3$  (30 mL), brine (30 mL), dried over anhydrous  $\text{Na}_2\text{SO}_4$  and concentrated under reduced pressure. The residue was purified by flash chromatography ( $\text{SiO}_2$ , hexanes/ $\text{EtOAc}$  85:15) to furnish lactone **10** (2253 mg, 9.0 mmol) as a white solid in 90% yield.

**Note:** The high purity of formic acid (>97%) was essential for full conversion. The use of formic acid of 85% purity led to incomplete conversion even with prolonged reaction time.

**TLC** ( $\text{SiO}_2$ ):  $R_f = 0.70$  (hexanes/ $\text{EtOAc}$  50:50);

**M.p.:** 87-89 °C;

$[\alpha]_{\text{D}}^{25} = -27$  ( $c$  1.0,  $\text{CHCl}_3$ ),  $[\alpha]_{\text{D, lit}} = -31.7$  ( $c$  0.4,  $\text{CHCl}_3$ );<sup>2</sup>

**$^1\text{H}$  NMR** (250 MHz,  $\text{CDCl}_3$ ):  $\delta$  0.78 (s, 3H), 0.82 (s, 6H), 0.75-0.87 (m, 2H), 1.01-1.15 (m, 1H), 1.23 (s, 3H), 1.26-1.61 (m, 7H), 1.69 (d,  $J = 7.7$  Hz, 1H), 2.14-2.26 (m, 1H), 2.27 (d,  $J = 18.0$  Hz, 1H), 2.64 (dd,  $J = 17.9, 7.9$  Hz, 1H);

**$^{13}\text{C}$  NMR** (62.9 MHz,  $\text{CDCl}_3$ ):  $\delta$  14.3 ( $\text{CH}_3$ ), 17.8 ( $\text{CH}_2$ ), 18.0 ( $\text{CH}_2$ ), 21.9 ( $\text{CH}_3$ ), 29.7 ( $\text{CH}_3$ ), 32.1 ( $\text{CH}_2$ ), 32.6 (C), 33.3 ( $\text{CH}_3$ ), 34.8 ( $\text{CH}_2$ ), 35.7 (C), 40.5 ( $\text{CH}_2$ ), 41.4 ( $\text{CH}_2$ ), 51.2 (CH), 54.4 (CH), 85.3 (C), 177.4 (C).

<sup>2</sup> Quideau, S.; Lebon, M.; Lamidey, A.-M. *Org. Lett.* **2002**, *4*, 3975-3978.

|                        |                                                                  |               |          |                       |                      |                        |              |                      |       |
|------------------------|------------------------------------------------------------------|---------------|----------|-----------------------|----------------------|------------------------|--------------|----------------------|-------|
| Acquisition Time (sec) | 3.1654                                                           | Comment       | LN208    | Date                  | 15 Jul 2016 10:00:48 |                        | Date Stamp   | 15 Jul 2016 10:00:48 |       |
| File Name              | C:\Users\Luiz\Desktop\Luiz\PhD\NMR\jul16\jul15\ftH2\1\PDATA\1\1r |               |          |                       |                      | Frequency (MHz)        | 250.13       | Nucleus              | 1H    |
| Number of Transients   | 5                                                                | Origin        | spect    | Original Points Count | 16384                | Owner                  | root         | Points Count         | 32768 |
| Pulse Sequence         | zg30                                                             | Receiver Gain | 64.00    | SW(cyclical) (Hz)     | 5175.98              | Solvent                | CHLOROFORM-d |                      |       |
| Spectrum Offset (Hz)   | 1544.6561                                                        | Spectrum Type | STANDARD | Sweep Width (Hz)      | 5175.83              | Temperature (degree C) | 25.160       |                      |       |

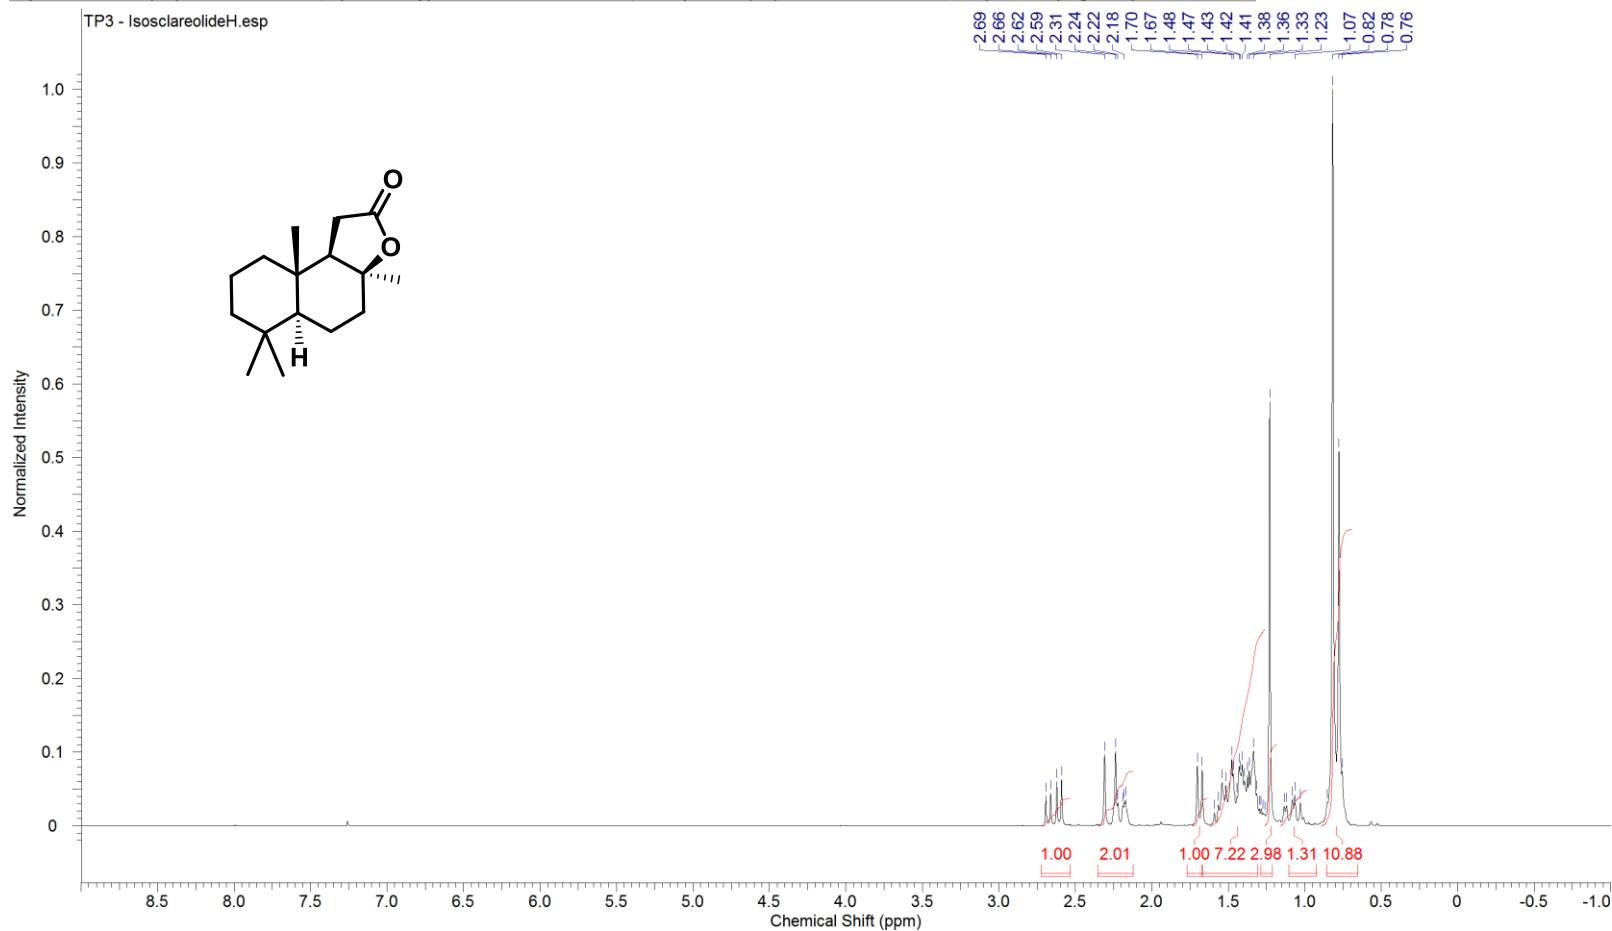

**Figure S4.**  $^1\text{H}$  NMR spectrum ( $\text{CDCl}_3$ , 250 MHz) of compound **10**.

|                        |                      |              |       |                      |                                                                  |                   |          |
|------------------------|----------------------|--------------|-------|----------------------|------------------------------------------------------------------|-------------------|----------|
| Acquisition Time (sec) | 1.0879               | Comment      | LN208 | Date                 | 15 Jul 2016 10:00:48                                             |                   |          |
| Date Stamp             | 15 Jul 2016 10:00:48 |              |       | File Name            | C:\Users\Luiz\Desktop\Luiz\PhD\NMR\jul16\jul15\ftH2\2\PDATA\1\1r |                   |          |
| Frequency (MHz)        | 62.90                | Nucleus      | 13C   | Number of Transients | 41                                                               | Origin            | spect    |
| Owner                  | root                 | Points Count | 32768 | Pulse Sequence       | zgpg30                                                           | Receiver Gain     | 456.10   |
| Solvent                | CHLOROFORM-d         |              |       | Spectrum Offset (Hz) | 6277.1221                                                        | Spectrum Type     | STANDARD |
| Temperature (degree C) | 25.160               |              |       |                      |                                                                  | SW(cyclical) (Hz) | 15060.24 |
|                        |                      |              |       |                      |                                                                  | Sweep Width (Hz)  | 15059.78 |

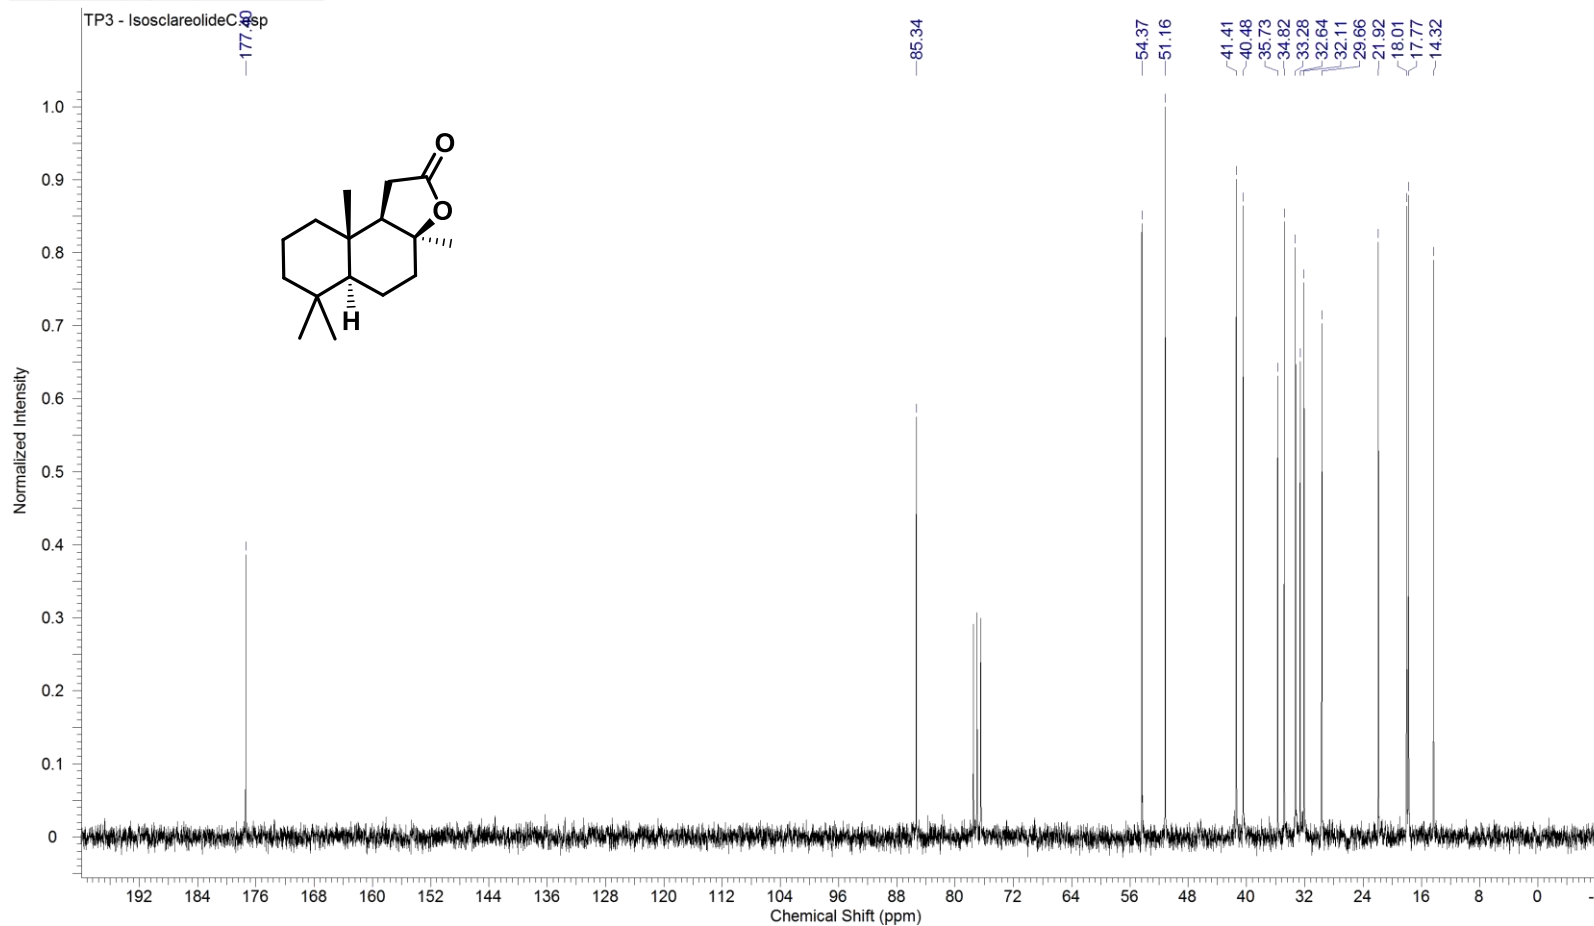

**Figure S5.**  $^{13}\text{C}$  NMR spectrum ( $\text{CDCl}_3$ , 62.9 MHz) of compound **10**.

|                        |                      |              |       |                      |                                                                  |                   |          |
|------------------------|----------------------|--------------|-------|----------------------|------------------------------------------------------------------|-------------------|----------|
| Acquisition Time (sec) | 0.5439               | Comment      | LN208 | Date                 | 15 Jul 2016 10:05:04                                             |                   |          |
| Date Stamp             | 15 Jul 2016 10:05:04 |              |       | File Name            | C:\Users\Luiz\Desktop\Luiz\PhD\NMR\jul16\jul15\ftH2\3\PDATA\1\1r |                   |          |
| Frequency (MHz)        | 62.90                | Nucleus      | 13C   | Number of Transients | 22                                                               | Origin            | spect    |
| Owner                  | root                 | Points Count | 32768 | Pulse Sequence       | dept135                                                          | Receiver Gain     | 16384.00 |
| Solvent                | CHLOROFORM-d         |              |       | Spectrum Offset (Hz) | 6289.0518                                                        | Spectrum Type     | DEPT135  |
| Temperature (degree C) | 25.160               |              |       |                      |                                                                  | SW(cyclical) (Hz) | 15060.24 |
|                        |                      |              |       |                      |                                                                  | Sweep Width (Hz)  | 15059.78 |

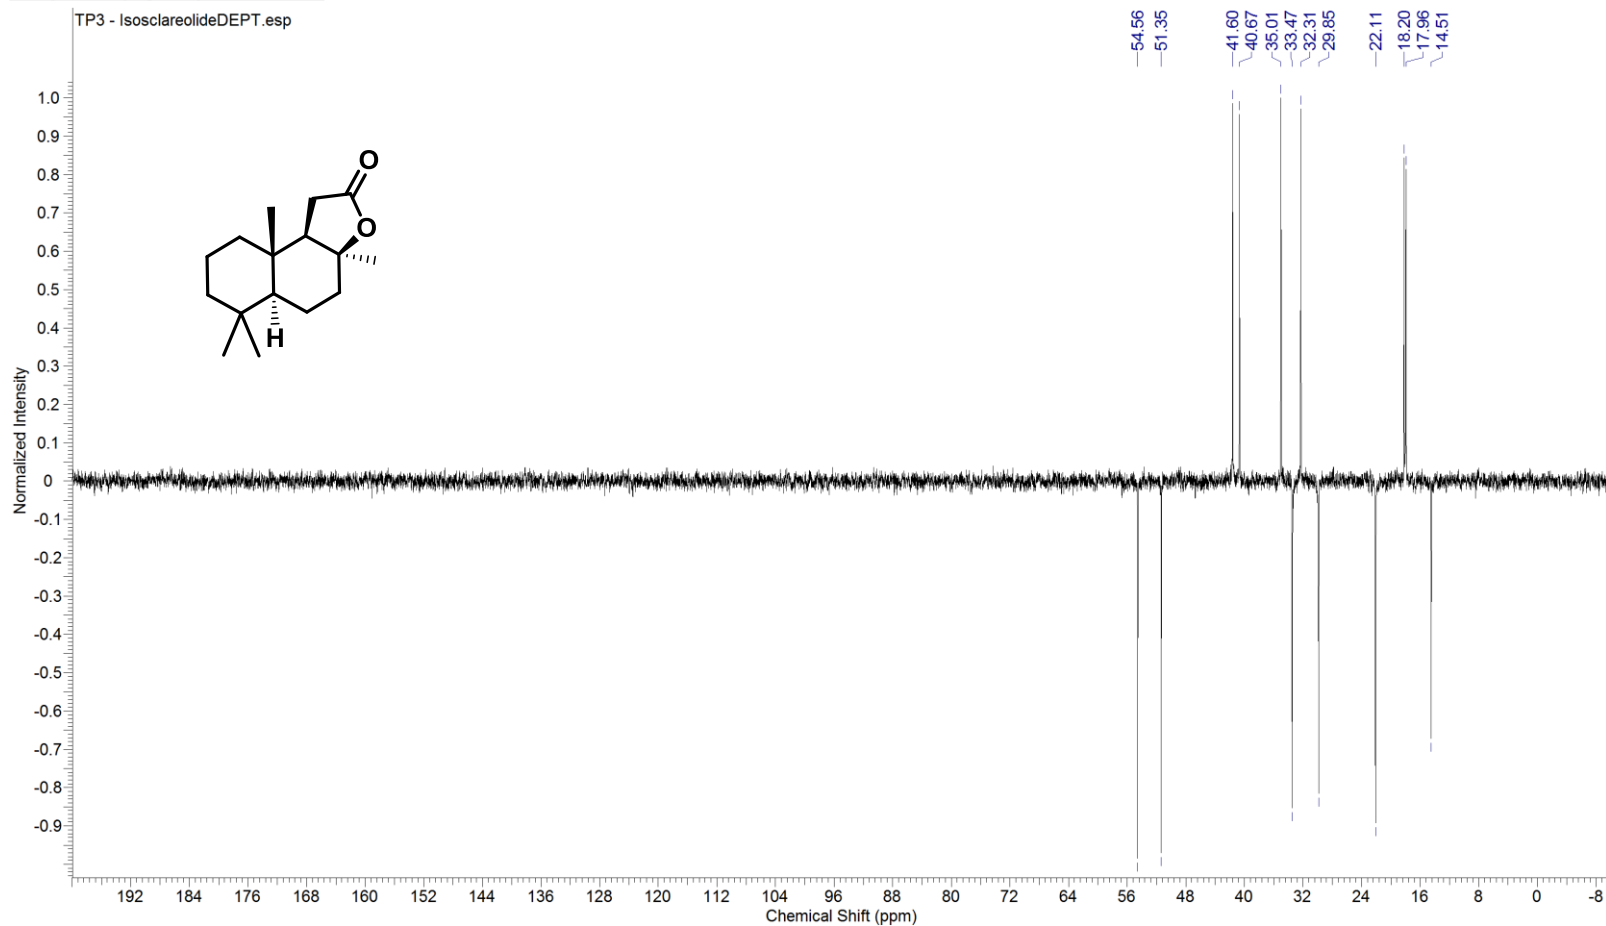

**Figure S6.** DEPT 135 NMR spectrum ( $\text{CDCl}_3$ , 62.9 MHz) of compound **10**.

2-((1*R*,2*S*,4*aS*,8*aS*)-2-hydroxy-2,5,5,8*a*-tetramethyldecahydronaphthalen-1-yl)-*N*-methoxy-*N*-methylacetamide (**11**).

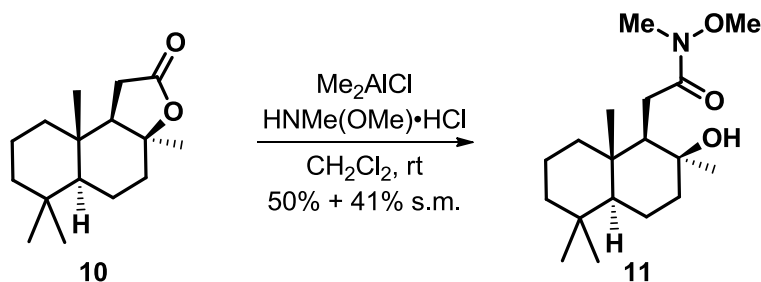

$\text{Me}_2\text{AlCl}$  (0.9 M in heptane, 8.0 mL, 7.2 mmol, 3 equiv) was added to a suspension of  $\text{MeONHMe·HCl}$  (702 mg, 7.2 mmol, 1 equiv) in dry  $\text{CH}_2\text{Cl}_2$  (20 mL) at 0 °C (**CAUTION!** *gas evolution*). After addition, the cooling bath was removed and the mixture was kept under magnetic stirring at room temperature for 2 h. Next, a solution of isosclareolide (**10**, 619 mg, 2.4 mmol, 1 equiv) in dry  $\text{CH}_2\text{Cl}_2$  (20 mL) was added to the reaction, and the stirring continued at room temperature for 18 h. After cooling to 0 °C, an aqueous solution of HCl (1 M, 50 mL) was slowly added (**CAUTION!** *gas evolution*). The organic phase was separated and the aqueous phase was extracted with  $\text{CH}_2\text{Cl}_2$  (2 x 50 mL). The organic phases were combined, dried over anhydrous  $\text{Na}_2\text{SO}_4$  and concentrated under reduced pressure. The residue was purified by flash chromatography ( $\text{SiO}_2$ , hexanes/EtOAc 85:15 to 30:70) to furnish amide **11** (375 mg, 1.2 mmol) as a white solid in 50% yield (85% yield based on the recovery of starting material), along recovered isosclareolide (**10**, 254 mg, 1.0 mmol) as a white solid in 41% yield.

**Note:** Use of  $\text{Me}_3\text{Al}$  led to little conversion (<5%) and the use of  $\text{Me}_2\text{AlCl}$  for prolonged reaction time at room temperature or use of refluxing conditions did not improve the yield.

**TLC** ( $\text{SiO}_2$ ):  $R_f$  = 0.30 (hexanes/EtOAc 50:50);

**M.p.:** 140-144 °C;

$[\alpha]_D^{25}$  = +24 (*c* 1.0,  $\text{CHCl}_3$ );

**IR** (ATR,  $\text{cm}^{-1}$ ): 3450, 2919, 2850, 1644, 1459, 1418, 1387, 1172, 1125, 1001, 915, 899;

**$^1\text{H}$  NMR** (250 MHz,  $\text{CDCl}_3$ ):  $\delta$  0.78 (s, 3H), 0.83 (s, 3H), 0.93 (s, 3H), 1.00 (s, 3H), 0.87-1.07 (m, 2H), 1.08-1.76 (m, 10H), 1.81-1.89 (m, 1H), 2.28 (dd,  $J$  = 18.0, 2.7 Hz, 1H), 2.70 (dd,  $J$  = 18.0, 5.8 Hz, 1H), 3.13 (s, 3H), 3.67 (s, 3H);

**$^{13}\text{C}$  NMR** (62.9 MHz,  $\text{CDCl}_3$ ):  $\delta$  15.6 ( $\text{CH}_3$ ), 18.1 ( $\text{CH}_2$ ), 18.2 ( $\text{CH}_2$ ), 21.5 ( $\text{CH}_3$ ), 26.8 ( $\text{CH}_2$ ), 30.4 ( $\text{CH}_3$ ), 32.7 ( $\text{CH}_3$ ), 33.1 (C), 33.3 ( $\text{CH}_3$ ), 38.0 (C), 38.7 ( $\text{CH}_2$ ), 41.7 ( $\text{CH}_2$ ), 42.3 ( $\text{CH}_2$ ), 52.2 (CH), 55.3 (CH), 61.1 ( $\text{CH}_3$ ), 72.7 (C), 175.3 (C);

**HRMS** (ESI +):  $m/z$  calculated for  $\text{C}_{18}\text{H}_{33}\text{O}_3\text{NNa}^+$  [ $\text{M}+\text{Na}$ ] $^+$  334.2353, found 334.2367.

|                        |                      |              |       |                      |                                                                     |                   |          |
|------------------------|----------------------|--------------|-------|----------------------|---------------------------------------------------------------------|-------------------|----------|
| Acquisition Time (sec) | 3.1654               | Comment      | LN223 | Date                 | 06 Apr 2017 14:08:16                                                |                   |          |
| Date Stamp             | 06 Apr 2017 14:08:16 |              |       | File Name            | C:\Users\Luiz\Desktop\Luiz\PhD\NMR\17-4-abr\abr06\ftH3\1\PDATA\1\1r |                   |          |
| Frequency (MHz)        | 250.13               | Nucleus      | 1H    | Number of Transients | 9                                                                   | Origin            | spect    |
| Owner                  | root                 | Points Count | 32768 | Pulse Sequence       | zg30                                                                | Receiver Gain     | 90.50    |
| Solvent                | CHLOROFORM-d         |              |       | Spectrum Offset (Hz) | 1544.6561                                                           | Spectrum Type     | STANDARD |
| Temperature (degree C) | 25.160               |              |       |                      |                                                                     | SW(cyclical) (Hz) | 5175.98  |
|                        |                      |              |       |                      |                                                                     | Sweep Width (Hz)  | 5175.83  |

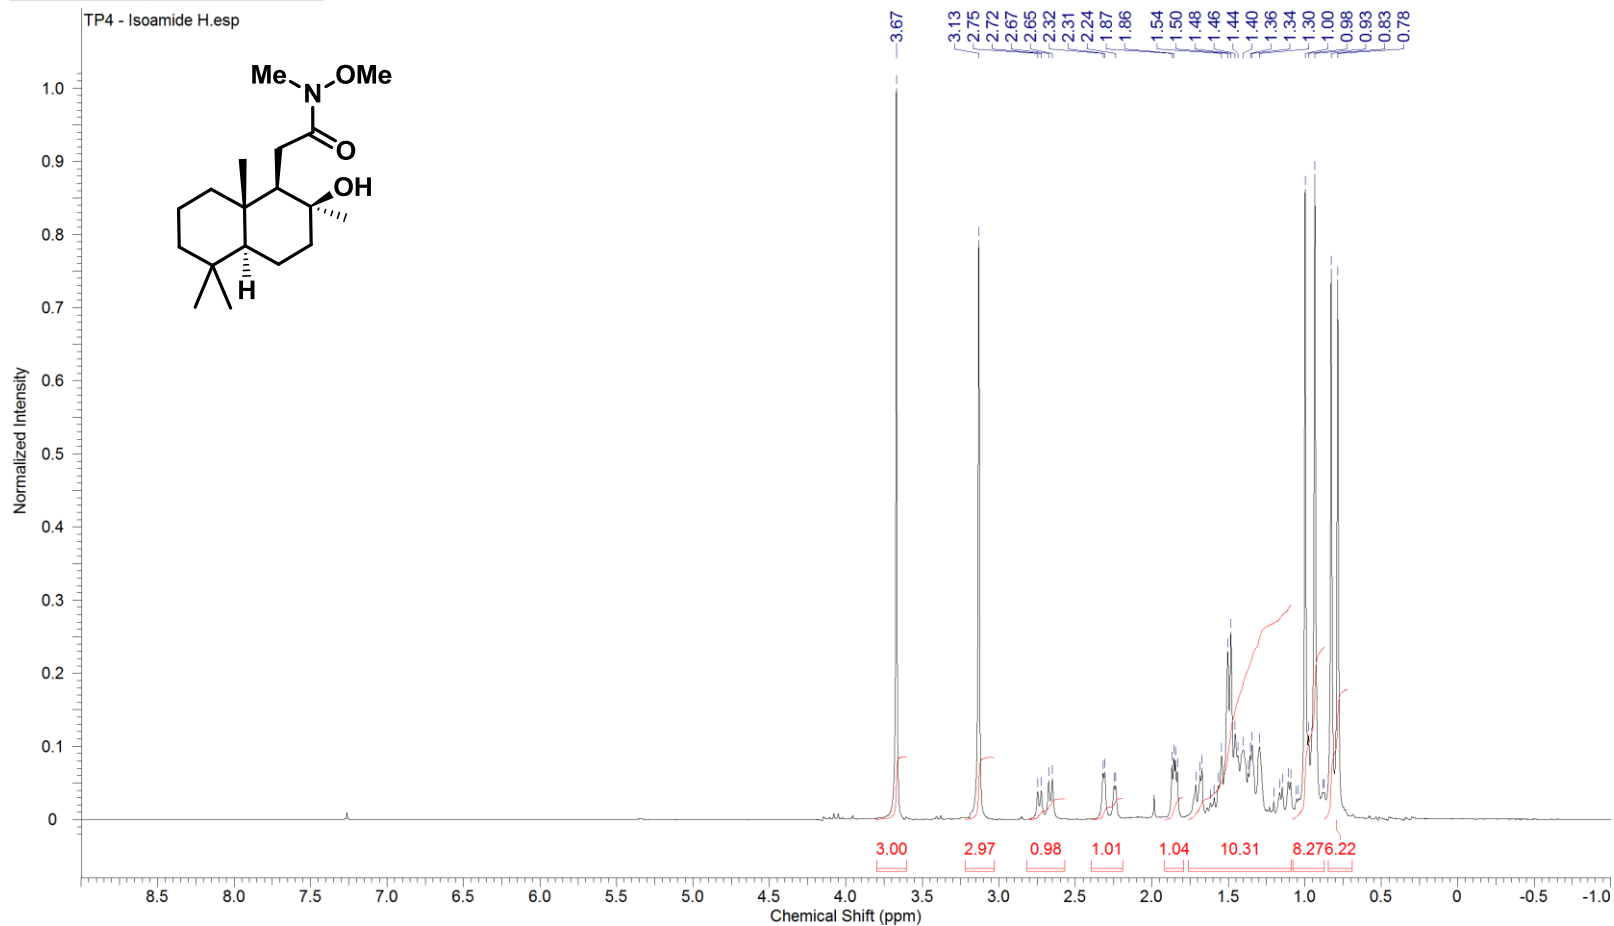

**Figure S7.**  $^1\text{H}$  NMR spectrum ( $\text{CDCl}_3$ , 250 MHz) of compound **11**.



|                        |                      |              |       |                      |                                                                     |                   |          |
|------------------------|----------------------|--------------|-------|----------------------|---------------------------------------------------------------------|-------------------|----------|
| Acquisition Time (sec) | 1.0879               | Comment      | LN223 | Date                 | 06 Apr 2017 14:12:32                                                |                   |          |
| Date Stamp             | 06 Apr 2017 14:12:32 |              |       | File Name            | C:\Users\Luiz\Desktop\Luiz\PhD\NMR\17-4-abr\abr06\ftH3\3\PDATA\1\1r |                   |          |
| Frequency (MHz)        | 62.90                | Nucleus      | 13C   | Number of Transients | 101                                                                 | Origin            | spect    |
| Owner                  | root                 | Points Count | 32768 | Pulse Sequence       | zgpg30                                                              | Receiver Gain     | 456.10   |
| Solvent                | CHLOROFORM-d         |              |       | Spectrum Offset (Hz) | 6284.4756                                                           | Spectrum Type     | STANDARD |
| Temperature (degree C) | 25.260               |              |       |                      |                                                                     | SW(cyclical) (Hz) | 15060.24 |
|                        |                      |              |       |                      |                                                                     | Sweep Width (Hz)  | 15059.78 |

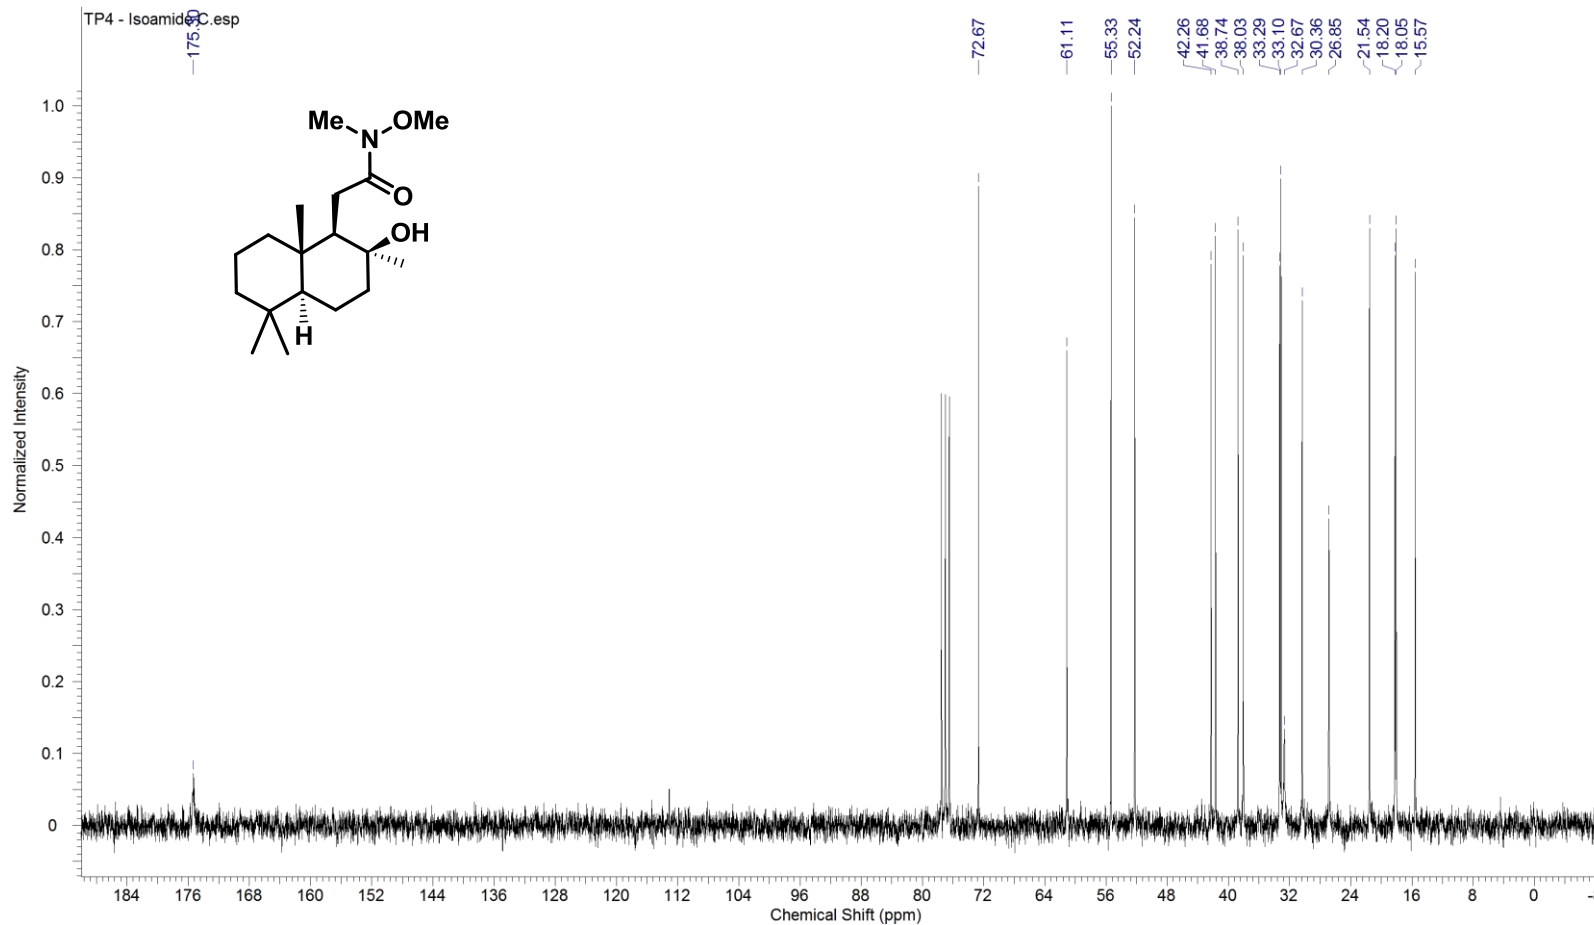

**Figure S8.**  $^{13}\text{C}$  NMR spectrum ( $\text{CDCl}_3$ , 62.9 MHz) of compound **11**.

|                        |                      |              |       |                      |                                                                     |                   |          |
|------------------------|----------------------|--------------|-------|----------------------|---------------------------------------------------------------------|-------------------|----------|
| Acquisition Time (sec) | 0.5439               | Comment      | LN223 | Date                 | 06 Apr 2017 14:10:24                                                |                   |          |
| Date Stamp             | 06 Apr 2017 14:10:24 |              |       | File Name            | C:\Users\Luiz\Desktop\Luiz\PhD\NMR\17-4-abr\abr06\ftH3\2\PDATA\1\1r |                   |          |
| Frequency (MHz)        | 62.90                | Nucleus      | 13C   | Number of Transients | 33                                                                  | Origin            | spect    |
| Owner                  | root                 | Points Count | 32768 | Pulse Sequence       | dept135                                                             | Receiver Gain     | 1824.60  |
| Solvent                | CHLOROFORM-d         |              |       | Spectrum Offset (Hz) | 6289.0518                                                           | Spectrum Type     | DEPT135  |
| Temperature (degree C) | 25.160               |              |       |                      |                                                                     | SW(cyclical) (Hz) | 15060.24 |
|                        |                      |              |       |                      |                                                                     | Sweep Width (Hz)  | 15059.78 |

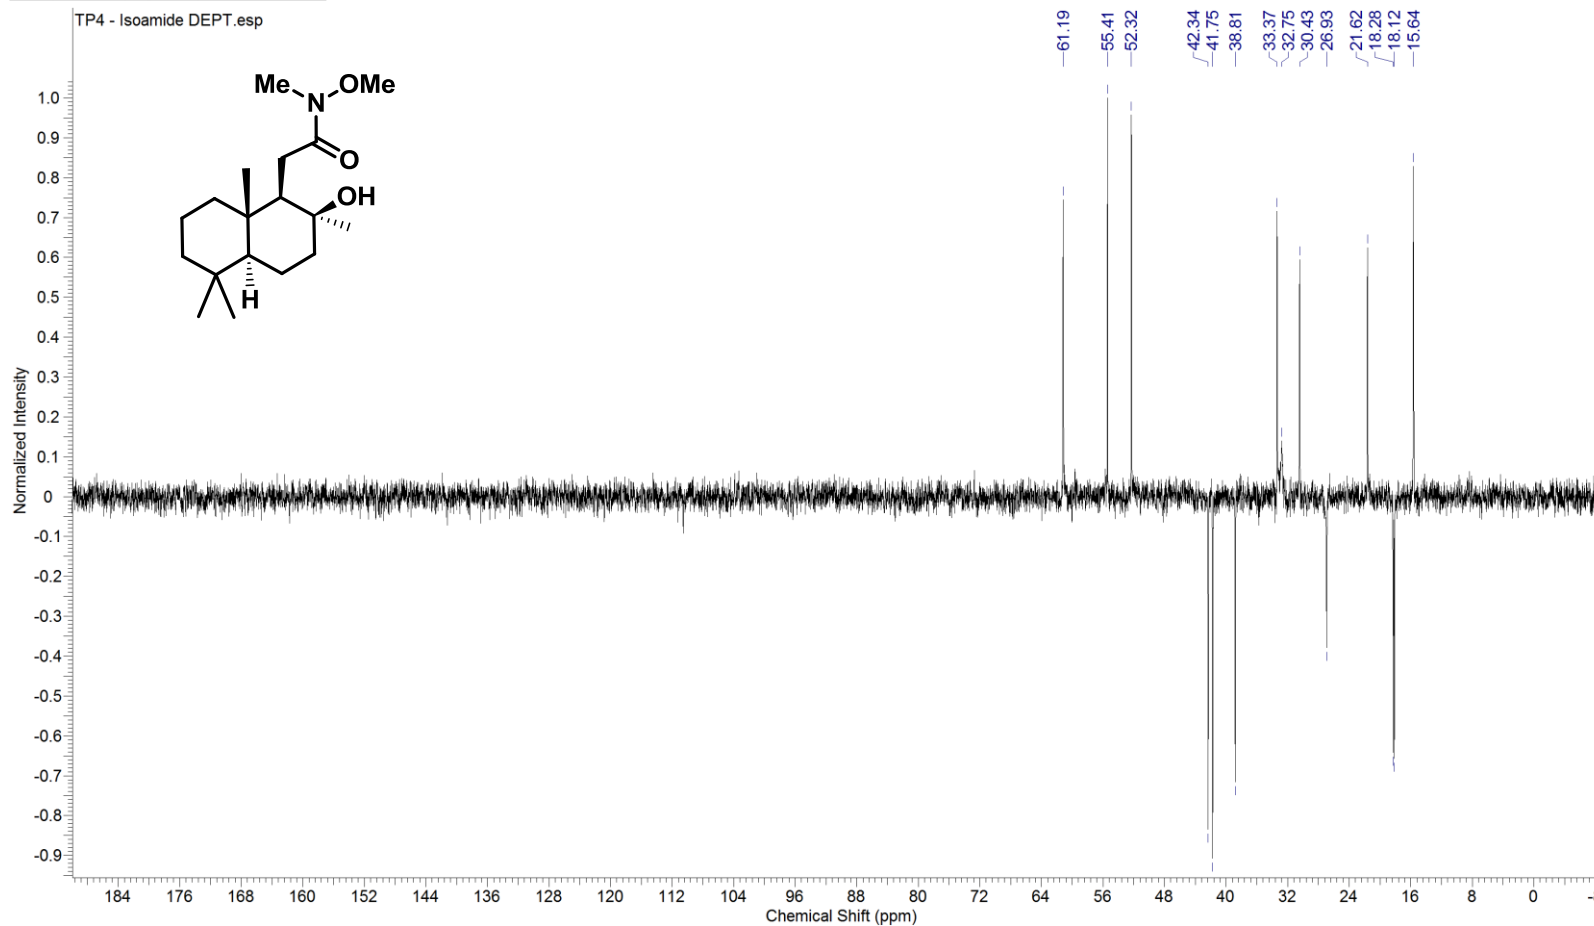

**Figure S9.** DEPT 135 NMR spectrum ( $\text{CDCl}_3$ , 62.9 MHz) of compound **11**.

# **X-Ray crystal structure of compound 11 (CCDC1543718)**

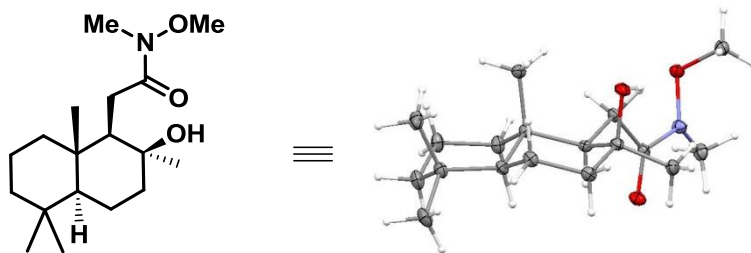

|                                             |                                                               |
|---------------------------------------------|---------------------------------------------------------------|
| Empirical formula                           | C <sub>18</sub> H <sub>33</sub> NO <sub>3</sub>               |
| Formula weight                              | 311.47                                                        |
| Temperature/K                               | 150.0                                                         |
| Crystal system                              | monoclinic                                                    |
| Space group                                 | P2 <sub>1</sub>                                               |
| a/Å                                         | 10.7535(5)                                                    |
| b/Å                                         | 6.9720(3)                                                     |
| c/Å                                         | 12.6570(6)                                                    |
| α/°                                         | 90                                                            |
| β/°                                         | 110.710(2)                                                    |
| γ/°                                         | 90                                                            |
| Volume/Å <sup>3</sup>                       | 887.62(7)                                                     |
| Z                                           | 2                                                             |
| ρ <sub>calc</sub> /cm <sup>3</sup>          | 1.1653                                                        |
| μ/mm <sup>-1</sup>                          | 0.614                                                         |
| F(000)                                      | 345.0                                                         |
| Crystal size/mm <sup>3</sup>                | 0.253 × 0.048 × 0.044                                         |
| Radiation                                   | Cu K <sub>α</sub> (λ = 1.54184)                               |
| 2θ range for data collection/°              | 7.46 to 135.98                                                |
| Index ranges                                | -12 ≤ h ≤ 12, -7 ≤ k ≤ 8, -14 ≤ l ≤ 11                        |
| Reflections collected                       | 6361                                                          |
| Independent reflections                     | 2757 [R <sub>int</sub> = 0.0329, R <sub>sigma</sub> = 0.0378] |
| Data/restraints/parameters                  | 2757/0/205                                                    |
| Goodness-of-fit on F <sup>2</sup>           | 0.908                                                         |
| Final R indexes [I ≥ 2σ (I)]                | R <sub>1</sub> = 0.0341, wR <sub>2</sub> = 0.1014             |
| Final R indexes [all data]                  | R <sub>1</sub> = 0.0349, wR <sub>2</sub> = 0.1034             |
| Largest diff. peak/hole / e Å <sup>-3</sup> | 0.22/-0.21                                                    |
| Flack parameter                             | 0.15(17)                                                      |

***N*-methoxy-*N*-methyl-2-((1*S*,4*aS*,8*aS*)-2,5,5,8*a*-tetramethyl-1,4,4*a*,5,6,7,8,8*a*-octahydronaphthalen-1-yl)acetamide (9) and *N*-methoxy-*N*-methyl-2-((1*S*,4*aS*,8*aS*)-5,5,8*a*-trimethyl-2-methylenedecahydronaphthalen-1-yl)acetamide (SI-1).**

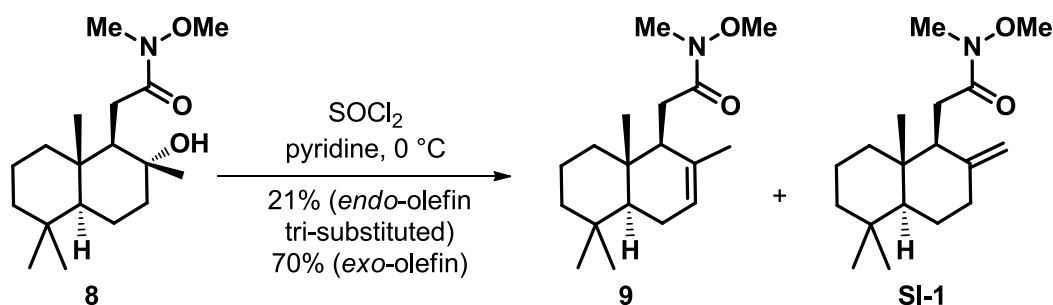

$\text{SOCl}_2$  (1.16 mL, 16 mmol, 10 equiv) was added to dry pyridine (7.5 mL) at  $0^\circ\text{C}$  (**CAUTION! exothermic process**), this solution was stirred for 5 min, then was transferred to a solution of alcohol **8** (498 mg, 1.60 mmol, 1 equiv) in dry pyridine (7.5 mL) at  $0^\circ\text{C}$ . After 30 min,  $\text{H}_2\text{O}$  (30 mL) was slowly added. The mixture was extracted with  $\text{CH}_2\text{Cl}_2$  (2 x 30 mL), the organic phases were combined, dried over anhydrous  $\text{Na}_2\text{SO}_4$  and concentrated under reduced pressure. The residue was purified by flash chromatography ( $\text{SiO}_2$ , hexanes/EtOAc 85:15) to furnish *endo*-olefin **9** (100 mg, 0.34 mmol) as a colorless oil in 21% yield, along *exo*-olefin **SI-1** (330 mg, 1.12 mmol) as a white solid in 70% yield.

**Note:** Attempts to isomerize the *exo*-olefin **SI-1** into the *endo*-olefin **9** as described by de la Torre and coworkers<sup>3</sup> led to poor results, obtaining at the best run 20% of the desired product as an inseparable mixture with isosclareolide (**10**).

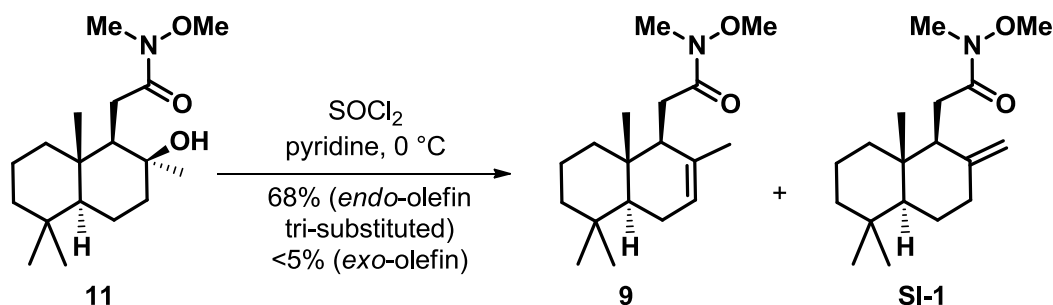

The experimental procedure was conducted as reported for its epimer (see above) to furnish the *endo*-olefin **9** (319 mg, 1.09 mmol) as a colorless oil in 68% yield, and trace amounts (less than 5% yield) of the *exo*-olefin **SI-1**.

#### Data for *endo*-olefin **9**:

**TLC** ( $\text{SiO}_2$ ):  $R_f = 0.26$  (hexanes/EtOAc 85:15);

$[\alpha]_D^{25} = +21$  (c 1.0,  $\text{CHCl}_3$ ),  $[\alpha]_{D,\text{lit}} = +15.2$  (c 0.25,  $\text{CHCl}_3$ );<sup>3</sup>

<sup>3</sup> de la Torre, M. C.; García, I.; Sierra, M. A. *J. Nat. Prod.* **2002**, *65*, 661-668.

**<sup>1</sup>H NMR** (250 MHz, CDCl<sub>3</sub>): δ 0.79 (s, 3H), 0.85 (s, 3H), 0.87 (s, 3H), 1.52 (s, 3H), 1.00-2.06 (m, 9H), 2.28 (dd, *J* = 16.7, 2.5 Hz, 1H), 2.46 (dd, *J* = 16.7, 9.2 Hz, 1H), 2.61-2.72 (m, 1H), 3.17 (s, 3H), 3.68 (s, 3H), 5.40 (br. s, 1H);

**<sup>13</sup>C NMR** (62.9 MHz, CDCl<sub>3</sub>): δ 14.0 (CH<sub>3</sub>), 18.5 (CH<sub>2</sub>), 21.1 (CH<sub>3</sub>), 21.6 (CH<sub>3</sub>), 23.5 (CH<sub>2</sub>), 28.9 (CH<sub>2</sub>), 32.6 (CH<sub>3</sub>), 32.7 (C), 32.9 (CH<sub>3</sub>), 35.7 (C), 38.7 (CH<sub>2</sub>), 41.9 (CH<sub>2</sub>), 48.8 (CH), 49.5 (CH), 60.9 (CH<sub>3</sub>), 121.9 (CH), 134.0 (C), 175.2 (C).

**Data for *exo*-olefin SI-1:**

**TLC (SiO<sub>2</sub>):** R<sub>f</sub> = 0.19 (hexanes/EtOAc 85:15);

**M.p.:** 82-85 °C (lit.: 84-86 °C);

[α]<sub>D</sub><sup>25</sup> = −29 (*c* 1.0, CHCl<sub>3</sub>), [α]<sub>D,lit</sub> = −30.9 (*c* 0.99, CHCl<sub>3</sub>);<sup>1</sup>

**<sup>1</sup>H NMR** (250 MHz, CDCl<sub>3</sub>): δ 0.64 (s, 3H), 0.72 (s, 3H), 0.79 (s, 3H), 0.98-1.70 (m, 9H), 1.93-2.11 (m, 1H), 2.21-2.34 (m, 2H), 2.39 (d, *J* = 10.3 Hz, 1H), 2.59 (dd, *J* = 15.5, 9.8 Hz, 1H), 3.05 (s, 3H), 3.62 (s, 3H), 4.34 (s, 1H), 4.62 (s, 1H);

**<sup>13</sup>C NMR** (62.9 MHz, CDCl<sub>3</sub>): δ 14.4 (CH<sub>3</sub>), 18.9 (CH<sub>2</sub>), 21.4 (CH<sub>3</sub>), 23.7 (CH<sub>2</sub>), 26.8 (CH<sub>2</sub>), 32.1 (CH<sub>3</sub>), 33.1 (C), 33.2 (CH<sub>3</sub>), 37.2 (CH<sub>2</sub>), 38.47 (CH<sub>2</sub>), 38.53 (C), 41.7 (CH<sub>2</sub>), 51.2 (CH), 54.7 (CH), 60.9 (CH<sub>3</sub>), 105.5 (CH<sub>2</sub>), 149.2 (C), 174.2 (C).

|                        |                      |              |        |                      |                                                                    |                   |          |
|------------------------|----------------------|--------------|--------|----------------------|--------------------------------------------------------------------|-------------------|----------|
| Acquisition Time (sec) | 3.1654               | Comment      | LN412A | Date                 | 19 Jan 2017 17:03:28                                               |                   |          |
| Date Stamp             | 19 Jan 2017 17:03:28 |              |        | File Name            | C:\Users\Luiz\Desktop\Luiz\PhD\NMR\jan17\jan19\ftH1\1\1\PDATA\1\1r |                   |          |
| Frequency (MHz)        | 250.13               | Nucleus      | 1H     | Number of Transients | 9                                                                  | Origin            | spect    |
| Owner                  | root                 | Points Count | 32768  | Pulse Sequence       | zg30                                                               | Receiver Gain     | 161.30   |
| Solvent                | CHLOROFORM-d         |              |        | Spectrum Offset (Hz) | 1544.4923                                                          | Spectrum Type     | STANDARD |
| Temperature (degree C) | 25.160               |              |        |                      |                                                                    | SW(cyclical) (Hz) | 5175.98  |
|                        |                      |              |        |                      |                                                                    | Sweep Width (Hz)  | 5175.83  |

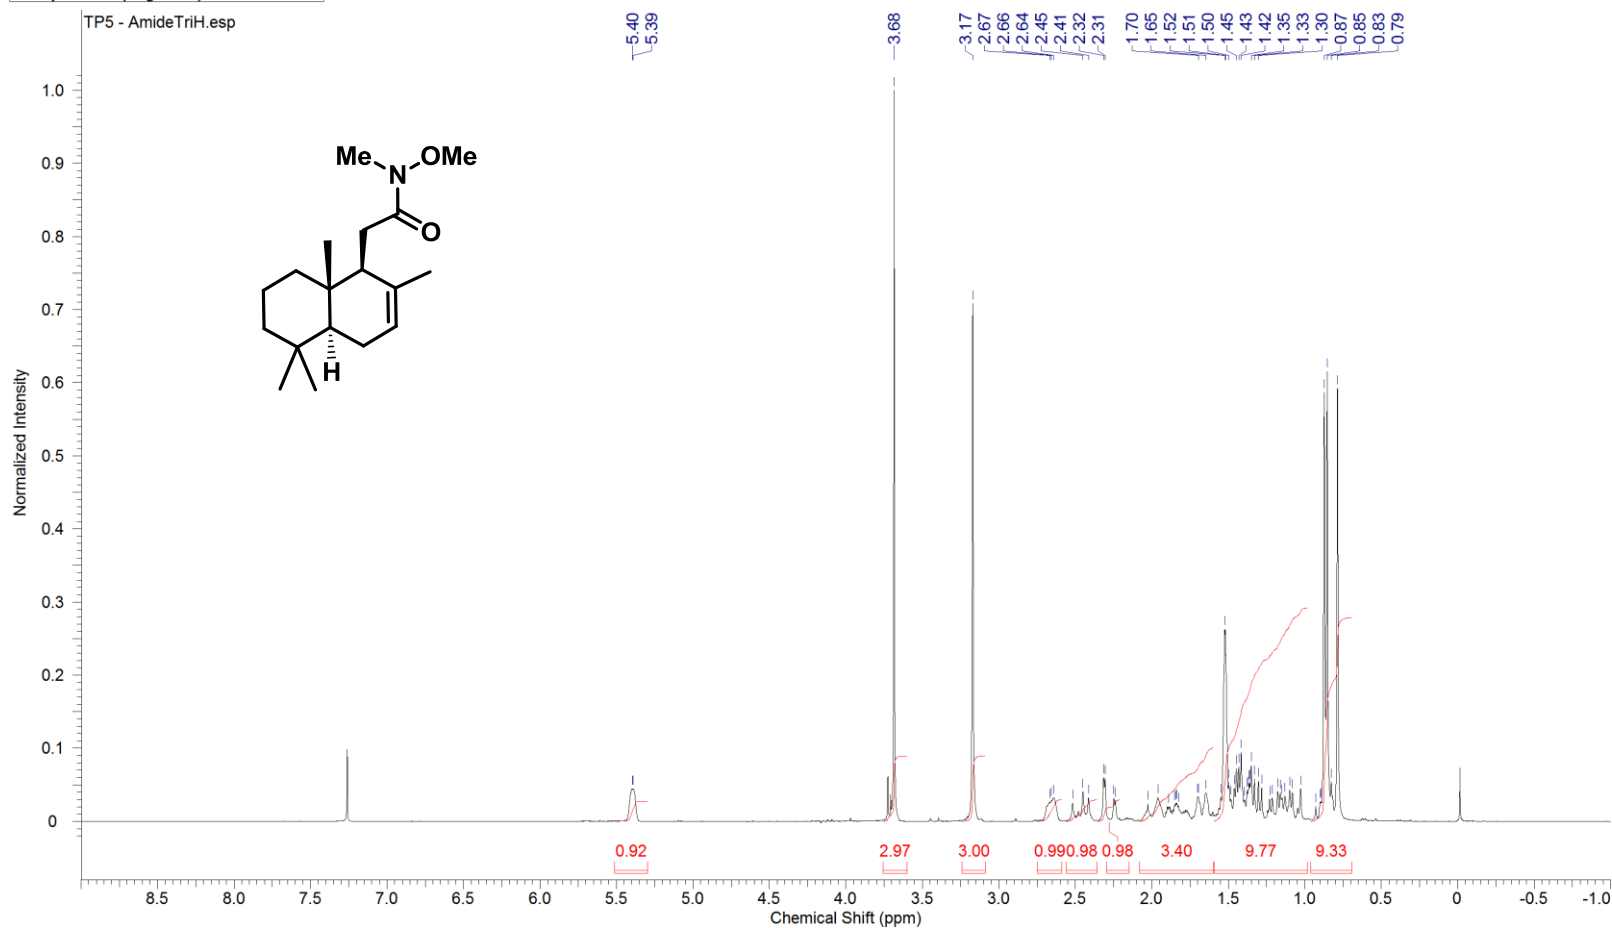

**Figure S10.**  $^1\text{H}$  NMR spectrum ( $\text{CDCl}_3$ , 250 MHz) of compound **9**.

|                        |                      |              |        |                      |                                                                  |                   |          |
|------------------------|----------------------|--------------|--------|----------------------|------------------------------------------------------------------|-------------------|----------|
| Acquisition Time (sec) | 1.0879               | Comment      | LN412B | Date                 | 20 Jan 2017 10:37:20                                             |                   |          |
| Date Stamp             | 20 Jan 2017 10:37:20 |              |        | File Name            | C:\Users\Luiz\Desktop\Luiz\PhD\NMR\jan17\jan20\ftH1\2\PDATA\1\1r |                   |          |
| Frequency (MHz)        | 62.90                | Nucleus      | 13C    | Number of Transients | 35                                                               | Origin            | spect    |
| Owner                  | root                 | Points Count | 32768  | Pulse Sequence       | zgpg30                                                           | Receiver Gain     | 812.70   |
| Solvent                | CHLOROFORM-d         |              |        | Spectrum Offset (Hz) | 6279.4194                                                        | Spectrum Type     | STANDARD |
| Temperature (degree C) | 25.260               |              |        |                      |                                                                  | SW(cyclical) (Hz) | 15060.24 |
|                        |                      |              |        |                      |                                                                  | Sweep Width (Hz)  | 15059.78 |

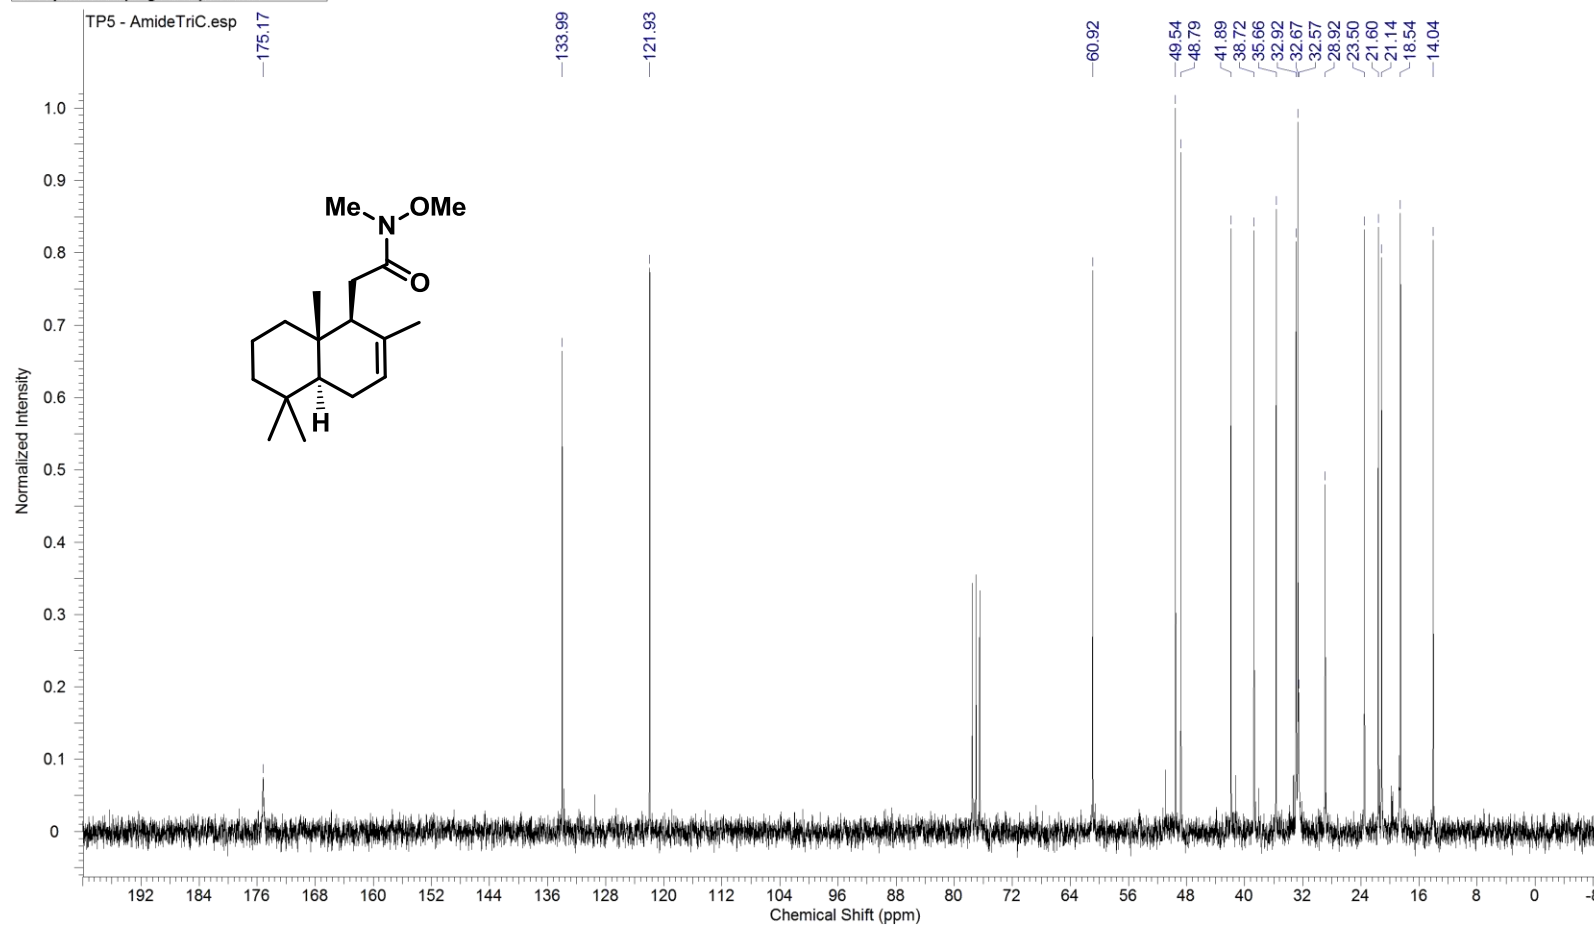

**Figure S11.**  $^{13}\text{C}$  NMR spectrum ( $\text{CDCl}_3$ , 62.9 MHz) of compound **9**.

|                        |                      |              |        |                      |                                                                  |                   |          |
|------------------------|----------------------|--------------|--------|----------------------|------------------------------------------------------------------|-------------------|----------|
| Acquisition Time (sec) | 0.5439               | Comment      | LN412A | Date                 | 19 Jan 2017 17:05:36                                             |                   |          |
| Date Stamp             | 19 Jan 2017 17:05:36 |              |        | File Name            | C:\Users\Luiz\Desktop\Luiz\PhD\NMR\jan17\jan19\ftH1\2\PDATA\1\1r |                   |          |
| Frequency (MHz)        | 62.90                | Nucleus      | 13C    | Number of Transients | 40                                                               | Origin            | spect    |
| Owner                  | root                 | Points Count | 32768  | Pulse Sequence       | dept135                                                          | Receiver Gain     | 2048.00  |
| Solvent                | CHLOROFORM-d         |              |        | Spectrum Offset (Hz) | 6275.6401                                                        | Spectrum Type     | DEPT135  |
| Temperature (degree C) | 25.160               |              |        |                      |                                                                  | SW(cyclical) (Hz) | 15060.24 |
|                        |                      |              |        |                      |                                                                  | Sweep Width (Hz)  | 15059.78 |

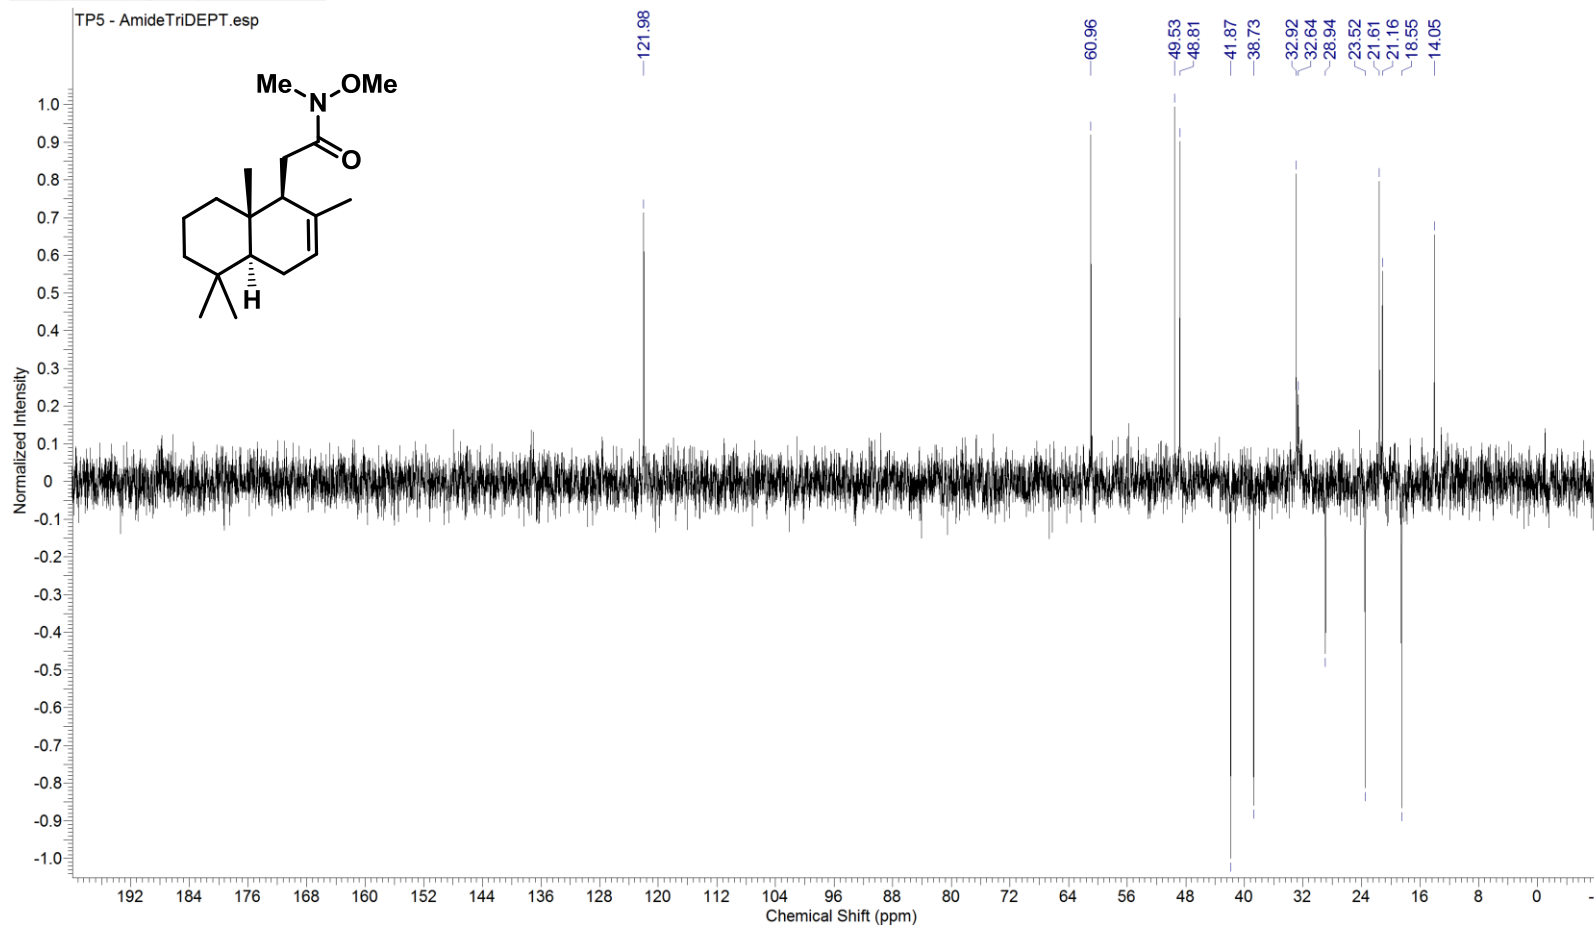

**Figure S12.** DEPT 135 NMR spectrum ( $\text{CDCl}_3$ , 62.9 MHz) of compound **9**.



|                        |                                                                                                       |                   |                |                        |                      |
|------------------------|-------------------------------------------------------------------------------------------------------|-------------------|----------------|------------------------|----------------------|
| Acquisition Time (sec) | 3.1654                                                                                                | Comment           | LN64B-D        | Date                   | 07 Nov 2015 18:16:00 |
| Date Stamp             | 07 Nov 2015 18:16:00                                                                                  |                   |                |                        |                      |
| File Name              | \\nmrsparc.iqm.unicamp.br\spectros\bruker250\2015\nov15\data\Julio Pastre\nmr\nov07\ftH3\1\PDATA\1\1r |                   |                |                        |                      |
| Frequency (MHz)        | 250.13                                                                                                | Nucleus           | <sup>1</sup> H | Number of Transients   | 9                    |
| Original Points Count  | 16384                                                                                                 | Owner             | root           | Points Count           | 32768                |
| Receiver Gain          | 45.30                                                                                                 | SW(cyclical) (Hz) | 5175.98        | Solvent                | CHLOROFORM-d         |
| Spectrum Offset (Hz)   | 1544.6561                                                                                             | Spectrum Type     | STANDARD       | Sweep Width (Hz)       | 5175.83              |
|                        |                                                                                                       |                   |                | Temperature (degree C) | 25.660               |

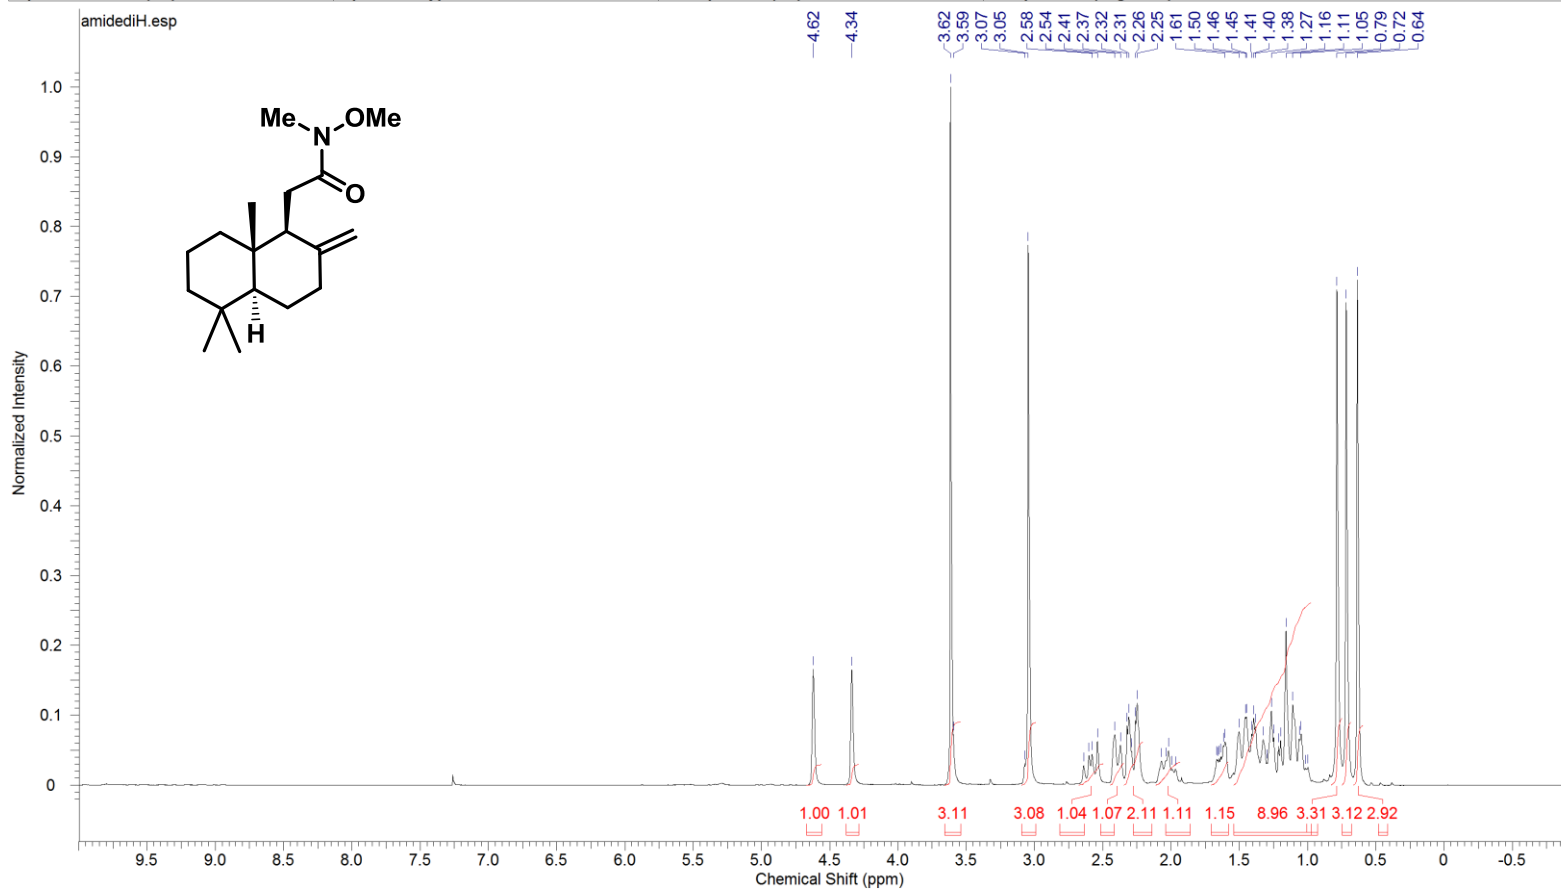

Figure S13. <sup>1</sup>H NMR spectrum (CDCl<sub>3</sub>, 250 MHz) of compound SI-1.

|                        |                                                                                                      |                      |              |                               |                      |                       |                      |           |
|------------------------|------------------------------------------------------------------------------------------------------|----------------------|--------------|-------------------------------|----------------------|-----------------------|----------------------|-----------|
| Acquisition Time (sec) | 1.0879                                                                                               | Comment              | LN64B-D      | Date                          | 07 Nov 2015 18:20:16 |                       |                      |           |
| Date Stamp             | 07 Nov 2015 18:20:16                                                                                 |                      |              |                               |                      |                       |                      |           |
| File Name              | \\nmrparc.lqm.unicamp.br\spectros\bruker250\2015\nov15\data\Julio Pastre\nmr\nov07\ftH3\3\PDATA\1\1r |                      |              |                               | Frequency (MHz)      | 62.90                 |                      |           |
| Nucleus                | 13C                                                                                                  | Number of Transients | 33           | Origin                        | spect                | Original Points Count | 16384                |           |
| Owner                  | root                                                                                                 | Points Count         | 32768        | Pulse Sequence                | zgpg30               | Receiver Gain         | 512.00               |           |
| SW(cyclical) (Hz)      | 15060.24                                                                                             | Solvent              | CHLOROFORM-d | Temperature (degree C) 25.560 |                      |                       | Spectrum Offset (Hz) | 6272.5254 |
| Spectrum Type          | STANDARD                                                                                             | Sweep Width (Hz)     | 15059.78     |                               |                      |                       |                      |           |

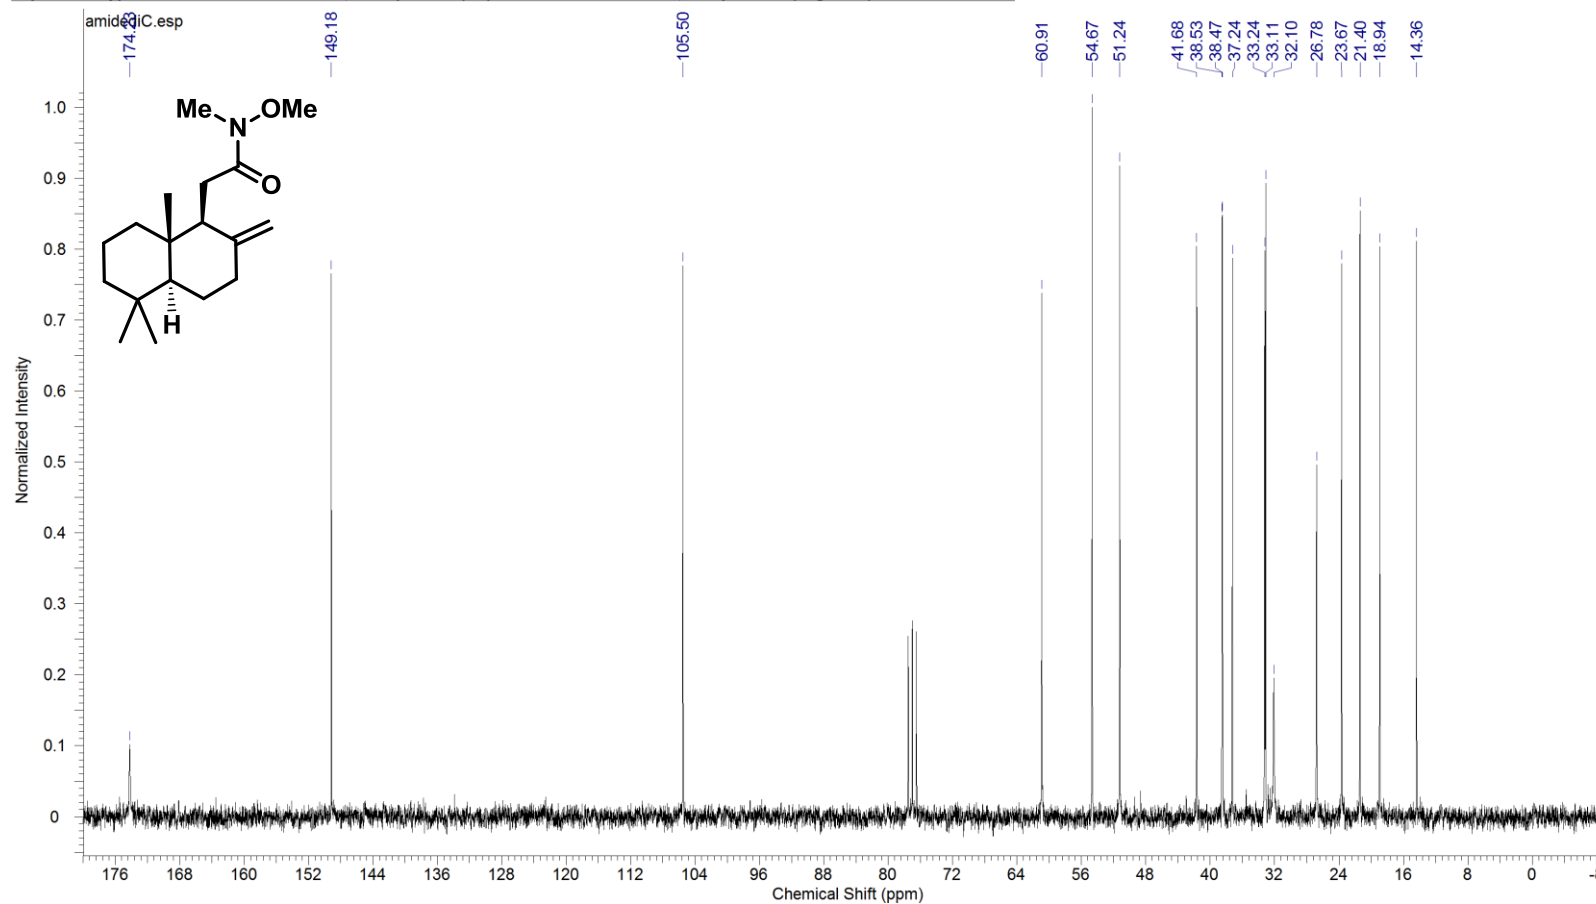

**Figure S14.** <sup>13</sup>C NMR spectrum (CDCl<sub>3</sub>, 62.9 MHz) of compound **SI-1**.

|                        |                      |              |         |                      |                                                                      |                   |          |
|------------------------|----------------------|--------------|---------|----------------------|----------------------------------------------------------------------|-------------------|----------|
| Acquisition Time (sec) | 0.5439               | Comment      | LN64B-D | Date                 | 07 Nov 2015 18:18:08                                                 |                   |          |
| Date Stamp             | 07 Nov 2015 18:18:08 |              |         | File Name            | C:\Users\Luiz\AppData\Local\Temp\Rar\Ra0.953\nov07\ftH3\2\PDATA\1\1r |                   |          |
| Frequency (MHz)        | 62.90                | Nucleus      | 13C     | Number of Transients | 13                                                                   | Origin            | spect    |
| Owner                  | root                 | Points Count | 32768   | Pulse Sequence       | dept135                                                              | Receiver Gain     | 812.70   |
| Solvent                | CHLOROFORM-d         |              |         | Spectrum Offset (Hz) | 6289.0518                                                            | Spectrum Type     | DEPT135  |
| Temperature (degree C) | 25.460               |              |         |                      |                                                                      | SW(cyclical) (Hz) | 15060.24 |
|                        |                      |              |         |                      |                                                                      | Sweep Width (Hz)  | 15059.78 |

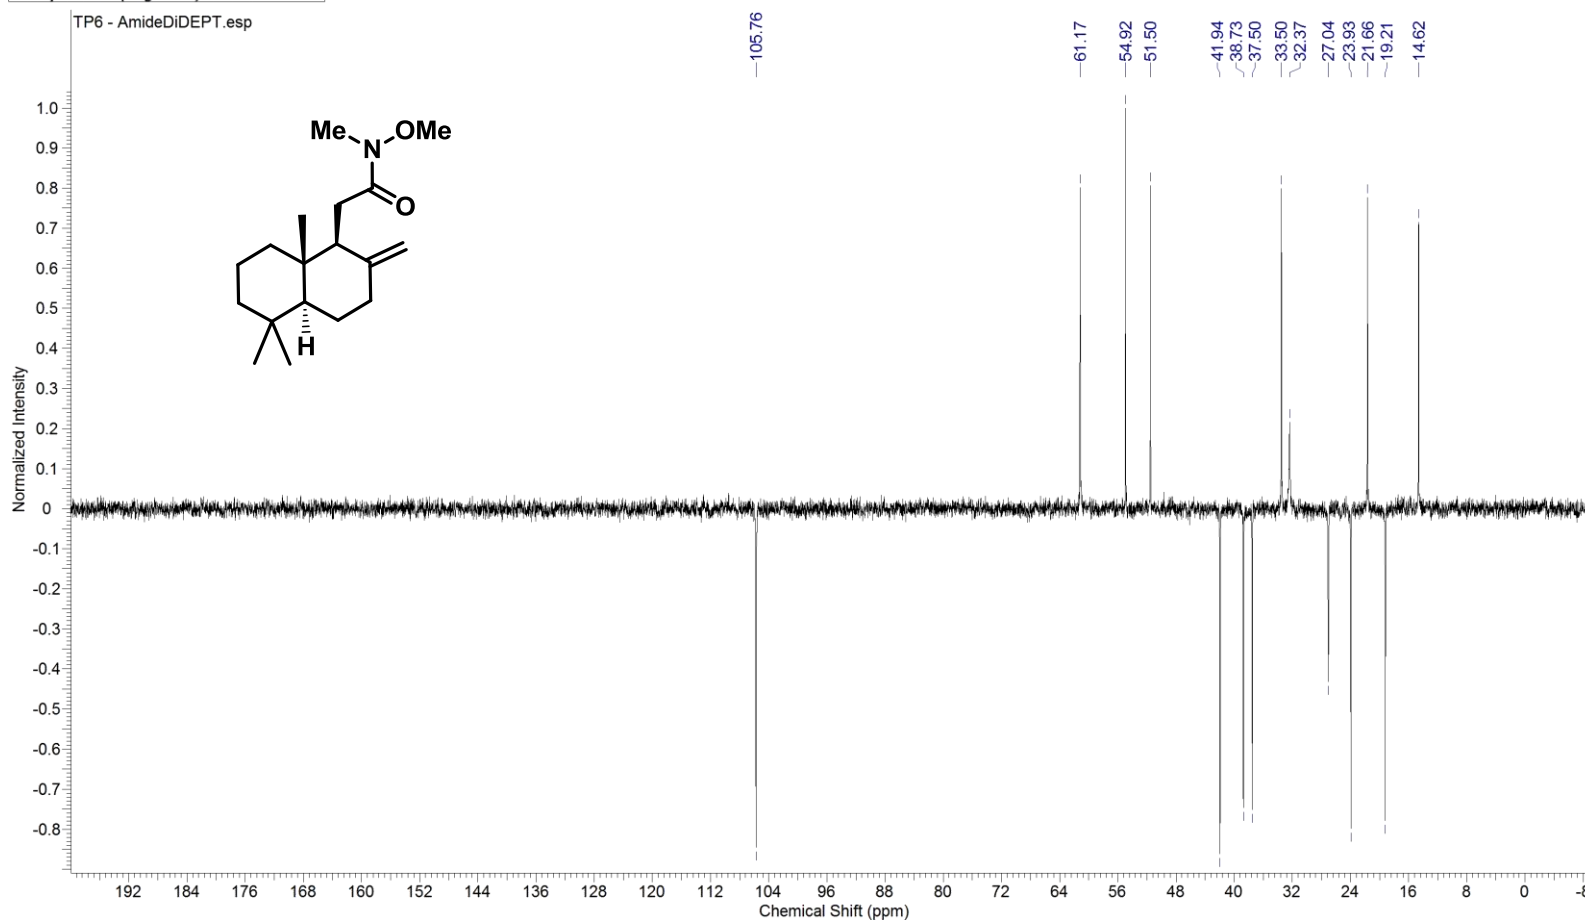

**Figure S15.** DEPT 135 NMR spectrum ( $\text{CDCl}_3$ , 62.9 MHz) of compound **SI-1**.

2-((1*S*,4*aS*,8*aS*)-2,5,5,8*a*-tetramethyl-1,4,4*a*,5,6,7,8,8*a*-octahydronaphthalen-1-yl)acetaldehyde (**12**).

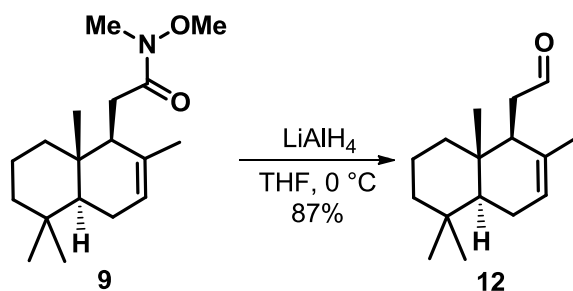

Solid LiAlH<sub>4</sub> (361 mg, 9.5 mmol, 5 equiv) was added to a solution of amide **9** (558 mg, 1.90 mmol, 1 equiv) in dry THF (38 mL) at 0 °C. After 2 h at the same temperature, an aqueous solution of HCl (1 M, 40 mL) was slowly added (*CAUTION! gas evolution*). The mixture was extracted with EtOAc (80 mL), the organic phase was dried over anhydrous MgSO<sub>4</sub> and concentrated under reduced pressure. The residue was purified by flash chromatography (SiO<sub>2</sub>, hexanes/EtOAc 95:5) to furnish aldehyde **12** (388 mg, 1.65 mmol) as a colorless oil in 87% yield.

**TLC** (SiO<sub>2</sub>): R<sub>f</sub> = 0.32 (hexanes/EtOAc 95:5);

[ $\alpha$ ]<sub>D</sub><sup>25</sup> = −15 (*c* 1.0, CHCl<sub>3</sub>), [ $\alpha$ ]<sub>D, lit</sub> = −29.2 (*c* 0.161, CHCl<sub>3</sub>);<sup>4</sup>

**<sup>1</sup>H NMR** (250 MHz, CDCl<sub>3</sub>):  $\delta$  0.77 (s, 3H), 0.87 (s, 3H), 0.88 (s, 3H), 1.51 (s, 3H), 1.00-2.06 (m, 9H), 2.37-2.59 (m, 3H), 5.46 (br. s, 1H), 9.84 (t, *J* = 1.6 Hz, 1H);

**<sup>13</sup>C NMR** (62.9 MHz, CDCl<sub>3</sub>):  $\delta$  14.2 (CH<sub>3</sub>), 18.7 (CH<sub>2</sub>), 21.8 (CH<sub>3</sub>), 22.5 (CH<sub>3</sub>), 23.6 (CH<sub>2</sub>), 32.9 (C), 33.1 (CH<sub>3</sub>), 36.0 (C), 39.5 (CH<sub>2</sub>), 42.0 (CH<sub>2</sub>), 42.3 (CH<sub>2</sub>), 48.5 (CH), 49.8 (CH), 123.4 (CH), 132.9 (C), 203.5 (CH).

<sup>4</sup> de la Torre, M. C.; García, I.; Sierra, M. A. *Tetrahedron Lett.* **2002**, 43, 6351-6353.

|                        |                                                                                                      |                   |          |                        |                      |
|------------------------|------------------------------------------------------------------------------------------------------|-------------------|----------|------------------------|----------------------|
| Acquisition Time (sec) | 3.1654                                                                                               | Comment           | LN170    | Date                   | 22 Mar 2016 17:01:04 |
| Date Stamp             | 22 Mar 2016 17:01:04                                                                                 |                   |          |                        |                      |
| File Name              | \\nmrparc.lqm.unicamp.br\spectros\bruker250\2016\mar16\data\Julio Pastre\nmr\mar22\ftH1\1\PDATA\1\1r |                   |          |                        |                      |
| Frequency (MHz)        | 250.13                                                                                               | Nucleus           | 1H       | Number of Transients   | 17                   |
| Original Points Count  | 16384                                                                                                | Owner             | root     | Points Count           | 32768                |
| Receiver Gain          | 287.40                                                                                               | SW(cyclical) (Hz) | 5175.98  | Solvent                | CHLOROFORM-d         |
| Spectrum Offset (Hz)   | 1544.6561                                                                                            | Spectrum Type     | STANDARD | Sweep Width (Hz)       | 5175.83              |
|                        |                                                                                                      |                   |          | Temperature (degree C) | 23.360               |

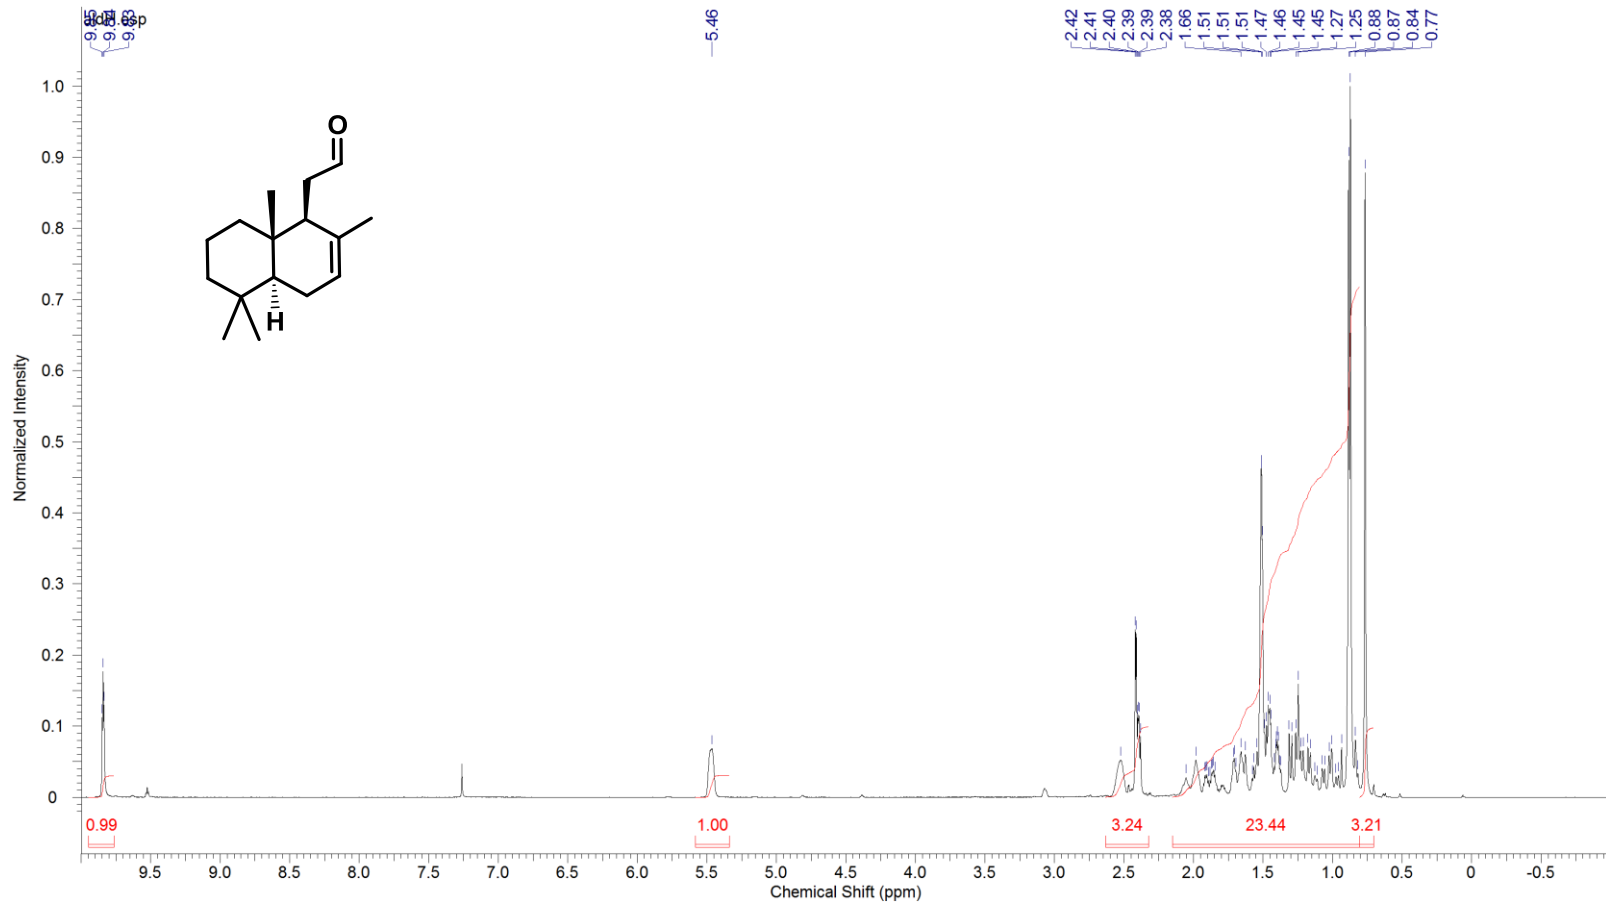

**Figure S16.**  $^1\text{H}$  NMR spectrum ( $\text{CDCl}_3$ , 250 MHz) of compound **12**.

|                        |                                                                                                      |                      |              |                        |                      |                       |                      |           |
|------------------------|------------------------------------------------------------------------------------------------------|----------------------|--------------|------------------------|----------------------|-----------------------|----------------------|-----------|
| Acquisition Time (sec) | 1.0879                                                                                               | Comment              | LN170        | Date                   | 22 Mar 2016 17:05:20 |                       |                      |           |
| Date Stamp             | 22 Mar 2016 17:05:20                                                                                 |                      |              |                        |                      |                       |                      |           |
| File Name              | \\nmrparc.iqm.unicamp.br\spectros\bruker250\2016\mar16\data\Julio Pastre\nmr\mar22\ftH1\3\PDATA\1\1r |                      |              |                        | Frequency (MHz)      | 62.90                 |                      |           |
| Nucleus                | <sup>13</sup> C                                                                                      | Number of Transients | 45           | Origin                 | spect                | Original Points Count | 16384                |           |
| Owner                  | root                                                                                                 | Points Count         | 32768        | Pulse Sequence         | zgpg30               | Receiver Gain         | 645.10               |           |
| SW(cyclical) (Hz)      | 15060.24                                                                                             | Solvent              | CHLOROFORM-d |                        |                      |                       | Spectrum Offset (Hz) | 6289.0518 |
| Spectrum Type          | STANDARD                                                                                             | Sweep Width (Hz)     | 15059.78     | Temperature (degree C) | 23.560               |                       |                      |           |

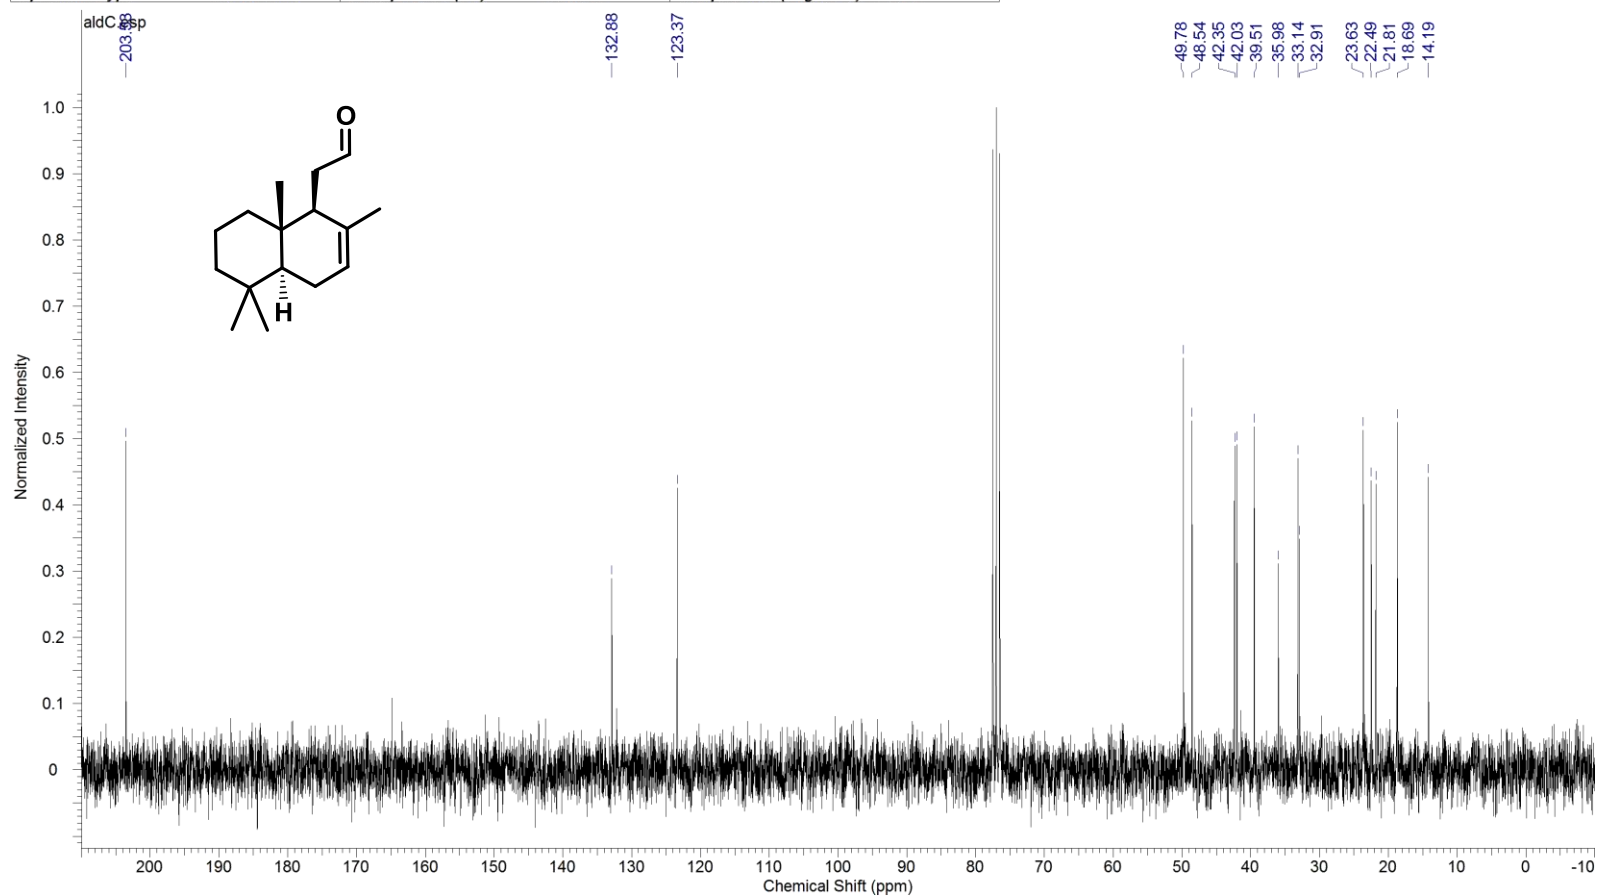

**Figure S17.** <sup>13</sup>C NMR spectrum (CDCl<sub>3</sub>, 62.9 MHz) of compound **12**.

|                        |                      |              |                 |                      |                                                                  |                   |          |
|------------------------|----------------------|--------------|-----------------|----------------------|------------------------------------------------------------------|-------------------|----------|
| Acquisition Time (sec) | 0.5439               | Comment      | LN170           | Date                 | 22 Mar 2016 17:03:12                                             |                   |          |
| Date Stamp             | 22 Mar 2016 17:03:12 |              |                 | File Name            | C:\Users\Luiz\Desktop\Luiz\PhD\NMR\mar16\mar22\ftH1\2\PDATA\1\1r |                   |          |
| Frequency (MHz)        | 62.90                | Nucleus      | <sup>13</sup> C | Number of Transients | 32                                                               | Origin            | spect    |
| Owner                  | root                 | Points Count | 32768           | Pulse Sequence       | dept135                                                          | Receiver Gain     | 2048.00  |
| Solvent                | CHLOROFORM-d         |              |                 | Spectrum Offset (Hz) | 6289.0518                                                        | Spectrum Type     | DEPT135  |
| Temperature (degree C) | 23.360               |              |                 |                      |                                                                  | SW(cyclical) (Hz) | 15060.24 |
|                        |                      |              |                 |                      |                                                                  | Sweep Width (Hz)  | 15059.78 |

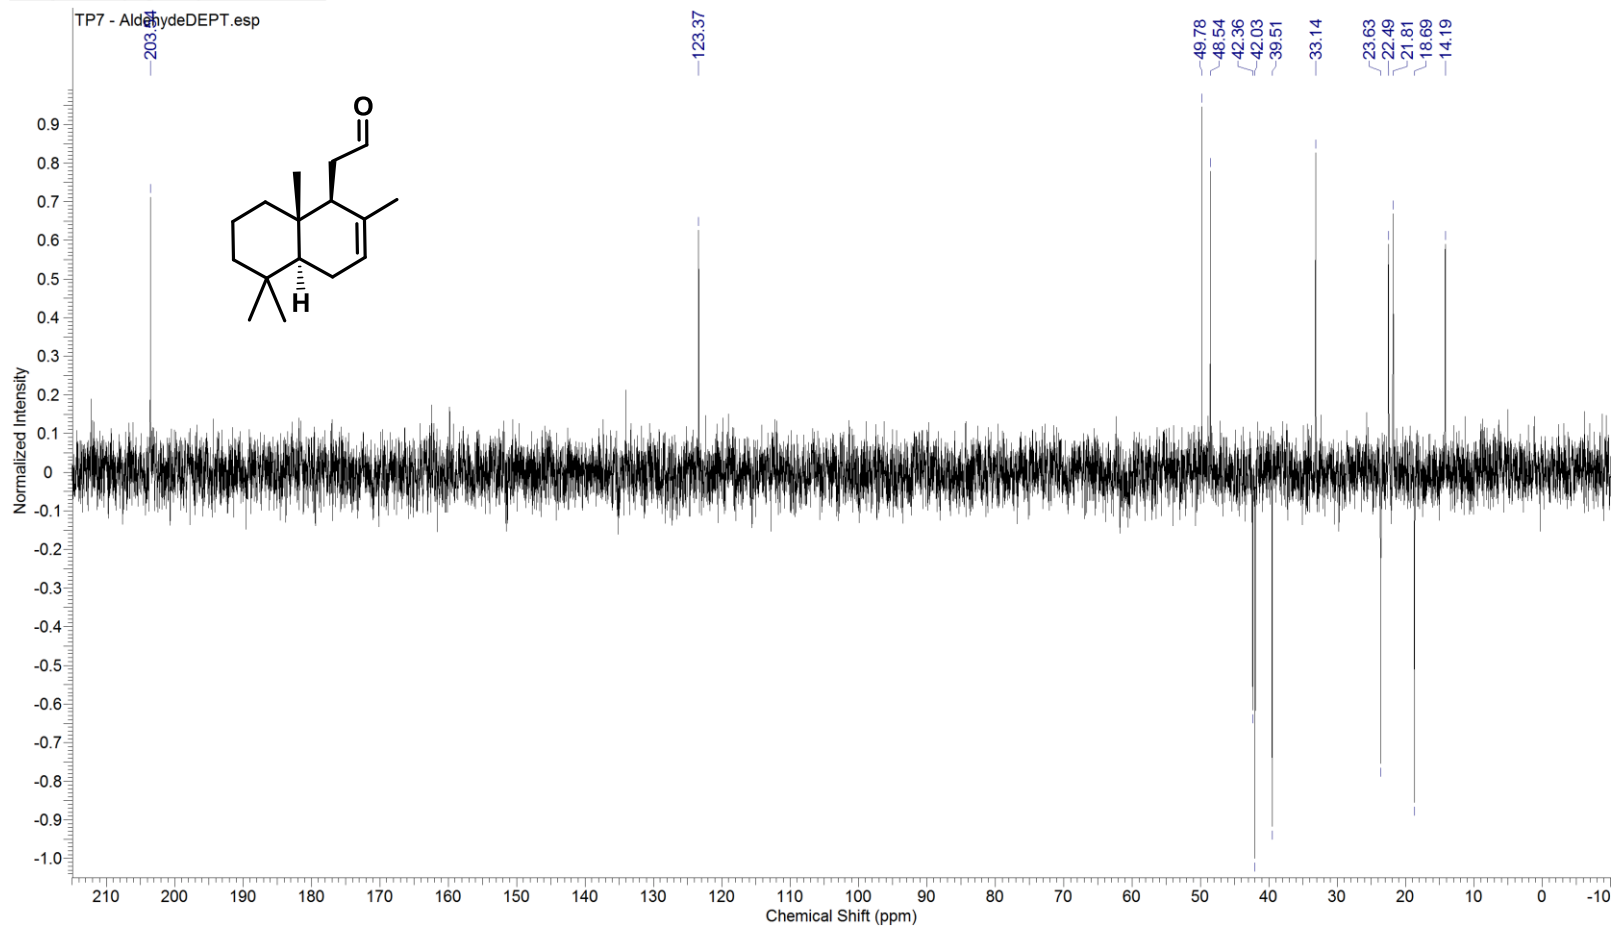

**Figure S18.** DEPT 135 NMR spectrum ( $\text{CDCl}_3$ , 62.9 MHz) of compound **12**.

3-((1*S*,4*aS*,8*aS*)-2,5,5,8*a*-tetramethyl-1,4,4*a*,5,6,7,8,8*a*-octahydronaphthalen-1-yl)propanenitrile (**13**).

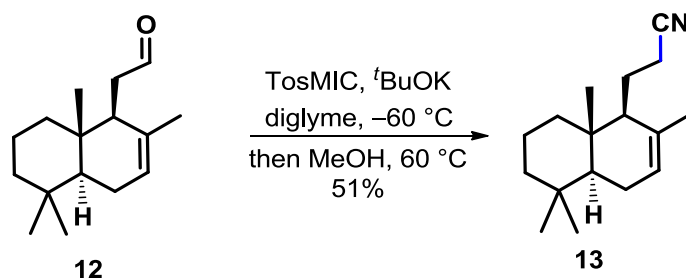

TosMIC (83.7 mg, 0.42 mmol, 2 equiv) in dry diglyme (2 mL) was added dropwise to a mixture of *t*-BuOK (74.4 mg, 0.63 mmol, 3 equiv) in diglyme (1 mL) at  $-60\text{ }^{\circ}\text{C}$ , and the resulting mixture was stirred for 10 min. A solution of aldehyde **12** (49.2 mg, 0.21 mmol, 1 equiv) in diglyme (2 mL) was added dropwise to the reaction at  $-60\text{ }^{\circ}\text{C}$ , the medium was stirred at this temperature for 1 h, and for 30 min at room temperature. Next, dry MeOH (2.5 mL) was added, and the reaction was stirred at  $60\text{ }^{\circ}\text{C}$  for 1 h. After that, the volatiles were removed under reduced pressure, and the residue was diluted with a saturated solution of  $\text{NH}_4\text{Cl}$  and the mixture was extracted with EtOAc (2 x 15 mL). The organic layers were combined, dried over anhydrous  $\text{Na}_2\text{SO}_4$ , and concentrated under reduced pressure. The residue was subjected to flash chromatography ( $\text{SiO}_2$ , hexanes/EtOAc 95:5 to 90:10) to give the nitrile **13** (26.5 mg, 0.108 mmol) as a colorless oil in 51% yield.

**TLC** ( $\text{SiO}_2$ ):  $R_f = 0.31$  (hexanes/EtOAc 95:5);

$[\alpha]_D^{25} = -1$  (*c* 1.0,  $\text{CHCl}_3$ );

**IR** (ATR,  $\text{cm}^{-1}$ ): 2923, 2848, 2245, 1457, 1388, 1168, 1051, 805;

**$^1\text{H}$  NMR** (250 MHz,  $\text{CDCl}_3$ ):  $\delta$  0.76 (s, 3H), 0.86 (s, 3H), 0.88 (s, 3H), 0.80-1.30 (m, 3H), 1.67 (s, 3H), 1.36-2.08 (m, 9H), 2.25-2.43 (m, 1H), 2.44-2.60 (m, 1H), 5.46 (br. s, 1H);

**$^{13}\text{C}$  NMR** (62.9 MHz,  $\text{CDCl}_3$ ):  $\delta$  13.6 ( $\text{CH}_3$ ), 18.6 ( $\text{CH}_2$ ), 18.9 ( $\text{CH}_2$ ), 21.8 ( $\text{CH}_3$ ), 22.0 ( $\text{CH}_3$ ), 23.1 ( $\text{CH}_2$ ), 23.7 ( $\text{CH}_2$ ), 32.9 (C), 33.1 ( $\text{CH}_3$ ), 36.6 (C), 39.0 ( $\text{CH}_2$ ), 42.0 ( $\text{CH}_2$ ), 49.8 (CH), 53.8 (CH), 119.9 (C), 123.9 (CH), 132.9 (C);

**HRMS** (ESI  $+$ ):  $m/z$  calculated for  $\text{C}_{17}\text{H}_{27}\text{NNa}^+$  [ $\text{M}+\text{Na}$ ] $^+$  268.2036, found 268.2031.



|                        |                      |              |       |                      |                                                                    |                   |          |
|------------------------|----------------------|--------------|-------|----------------------|--------------------------------------------------------------------|-------------------|----------|
| Acquisition Time (sec) | 3.1654               | Comment      | LN212 | Date                 | 18 Jul 2016 16:31:12                                               |                   |          |
| Date Stamp             | 18 Jul 2016 16:31:12 |              |       | File Name            | C:\Users\Luiz\Desktop\Luiz\PhD\NMR\jul16\jul18\ftH1\1\1\PDATA\1\1r |                   |          |
| Frequency (MHz)        | 250.13               | Nucleus      | 1H    | Number of Transients | 17                                                                 | Origin            | spect    |
| Owner                  | root                 | Points Count | 32768 | Pulse Sequence       | zg30                                                               | Receiver Gain     | 362.00   |
| Solvent                | CHLOROFORM-d         |              |       | Spectrum Offset (Hz) | 1544.9661                                                          | Spectrum Type     | STANDARD |
| Temperature (degree C) | 25.160               |              |       |                      |                                                                    | SW(cyclical) (Hz) | 5175.98  |
|                        |                      |              |       |                      |                                                                    | Sweep Width (Hz)  | 5175.83  |

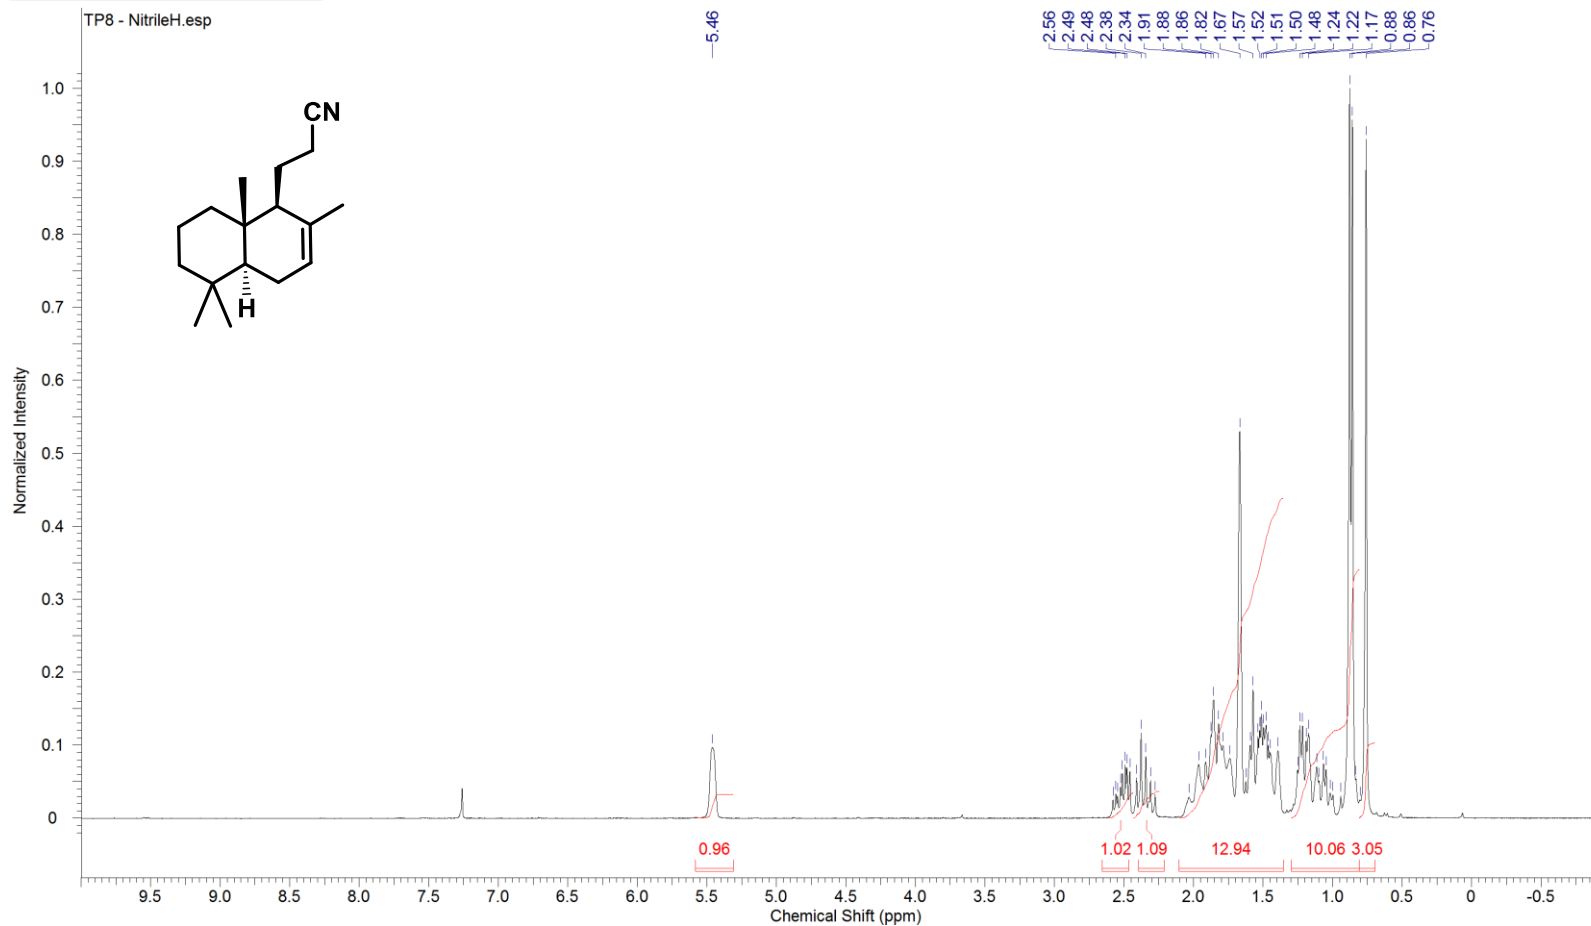

**Figure S19.**  $^1\text{H}$  NMR spectrum ( $\text{CDCl}_3$ , 250 MHz) of compound **13**.

|                        |                      |              |       |                      |                                                                  |                   |          |
|------------------------|----------------------|--------------|-------|----------------------|------------------------------------------------------------------|-------------------|----------|
| Acquisition Time (sec) | 1.0879               | Comment      | LN212 | Date                 | 18 Jul 2016 16:33:20                                             |                   |          |
| Date Stamp             | 18 Jul 2016 16:33:20 |              |       | File Name            | C:\Users\Luiz\Desktop\Luiz\PhD\NMR\jul16\jul18\ftH1\2\PDATA\1\1r |                   |          |
| Frequency (MHz)        | 62.90                | Nucleus      | 13C   | Number of Transients | 97                                                               | Origin            | spect    |
| Owner                  | root                 | Points Count | 32768 | Pulse Sequence       | zgpg30                                                           | Receiver Gain     | 724.10   |
| Solvent                | CHLOROFORM-d         |              |       | Spectrum Offset (Hz) | 6288.6118                                                        | Spectrum Type     | STANDARD |
| Temperature (degree C) | 25.160               |              |       |                      |                                                                  | SW(cyclical) (Hz) | 15060.24 |
|                        |                      |              |       |                      |                                                                  | Sweep Width (Hz)  | 15059.78 |

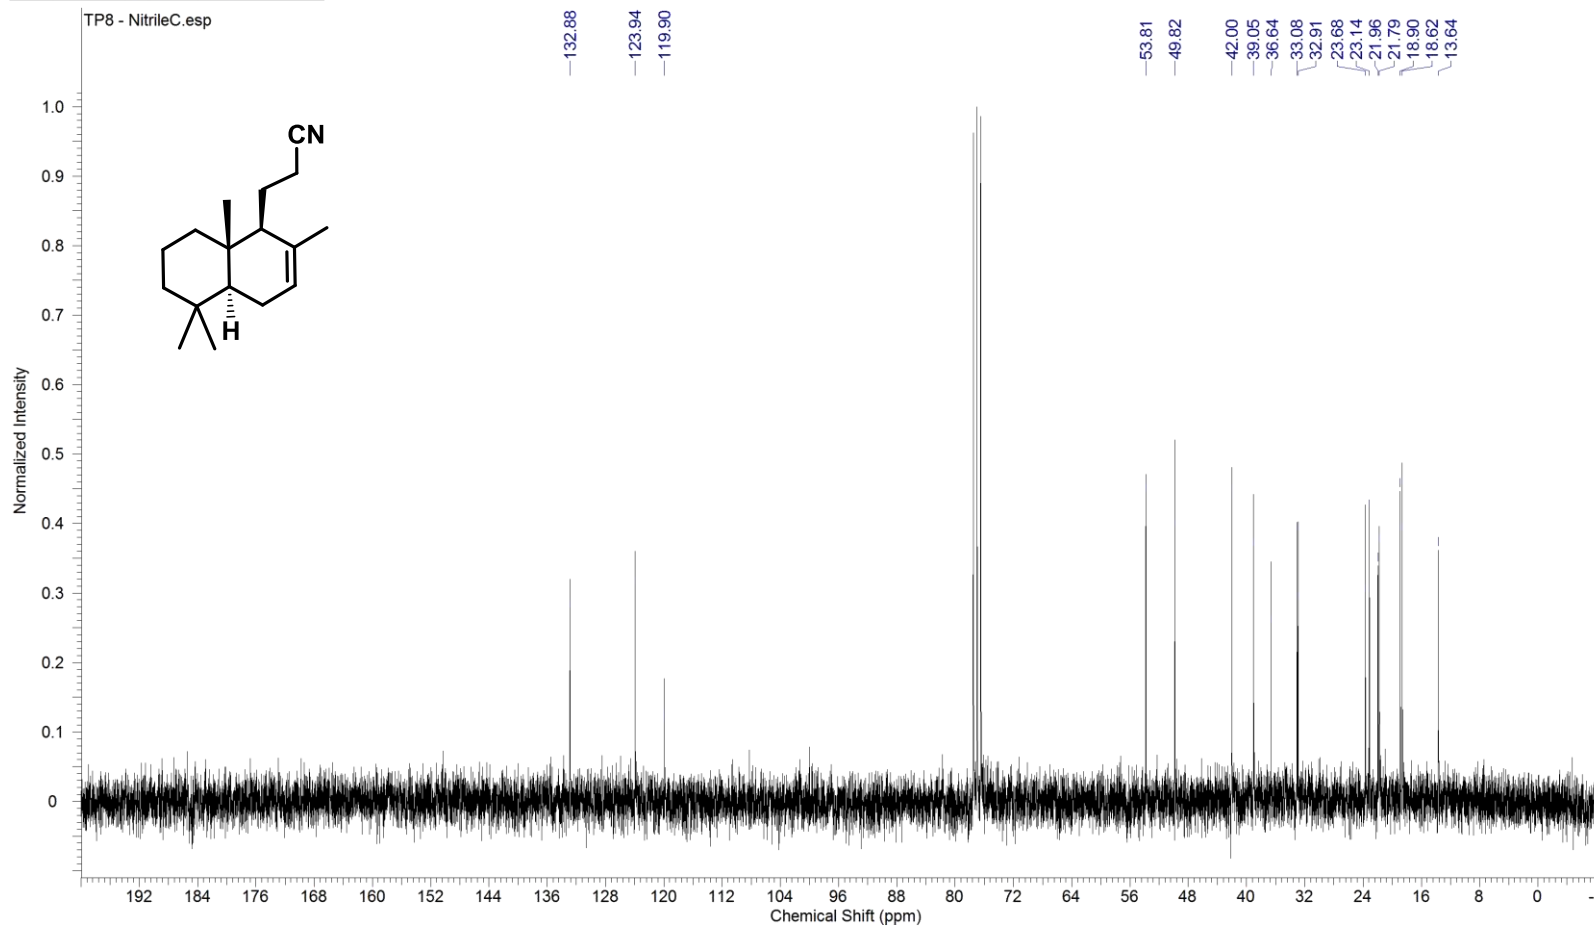

**Figure S20.**  $^{13}\text{C}$  NMR spectrum ( $\text{CDCl}_3$ , 62.9 MHz) of compound **13**.

|                        |                      |              |       |                      |                                                                  |                  |          |
|------------------------|----------------------|--------------|-------|----------------------|------------------------------------------------------------------|------------------|----------|
| Acquisition Time (sec) | 0.5439               | Comment      | LN212 | Date                 | 19 Jul 2016 08:24:48                                             |                  |          |
| Date Stamp             | 19 Jul 2016 08:24:48 |              |       | File Name            | C:\Users\Luiz\Desktop\Luiz\PhD\NMR\jul16\jul19\ftH1\2\PDATA\1\1r |                  |          |
| Frequency (MHz)        | 62.90                | Nucleus      | 13C   | Number of Transients | 56                                                               | Origin           | spect    |
| Owner                  | root                 | Points Count | 32768 | Pulse Sequence       | dept135                                                          | Receiver Gain    | 16384.00 |
| Solvent                | CHLOROFORM-d         |              |       | Spectrum Offset (Hz) | 6289.0518                                                        | Spectrum Type    | DEPT135  |
| Temperature (degree C) | 25.160               |              |       |                      |                                                                  | Sweep Width (Hz) | 15059.78 |

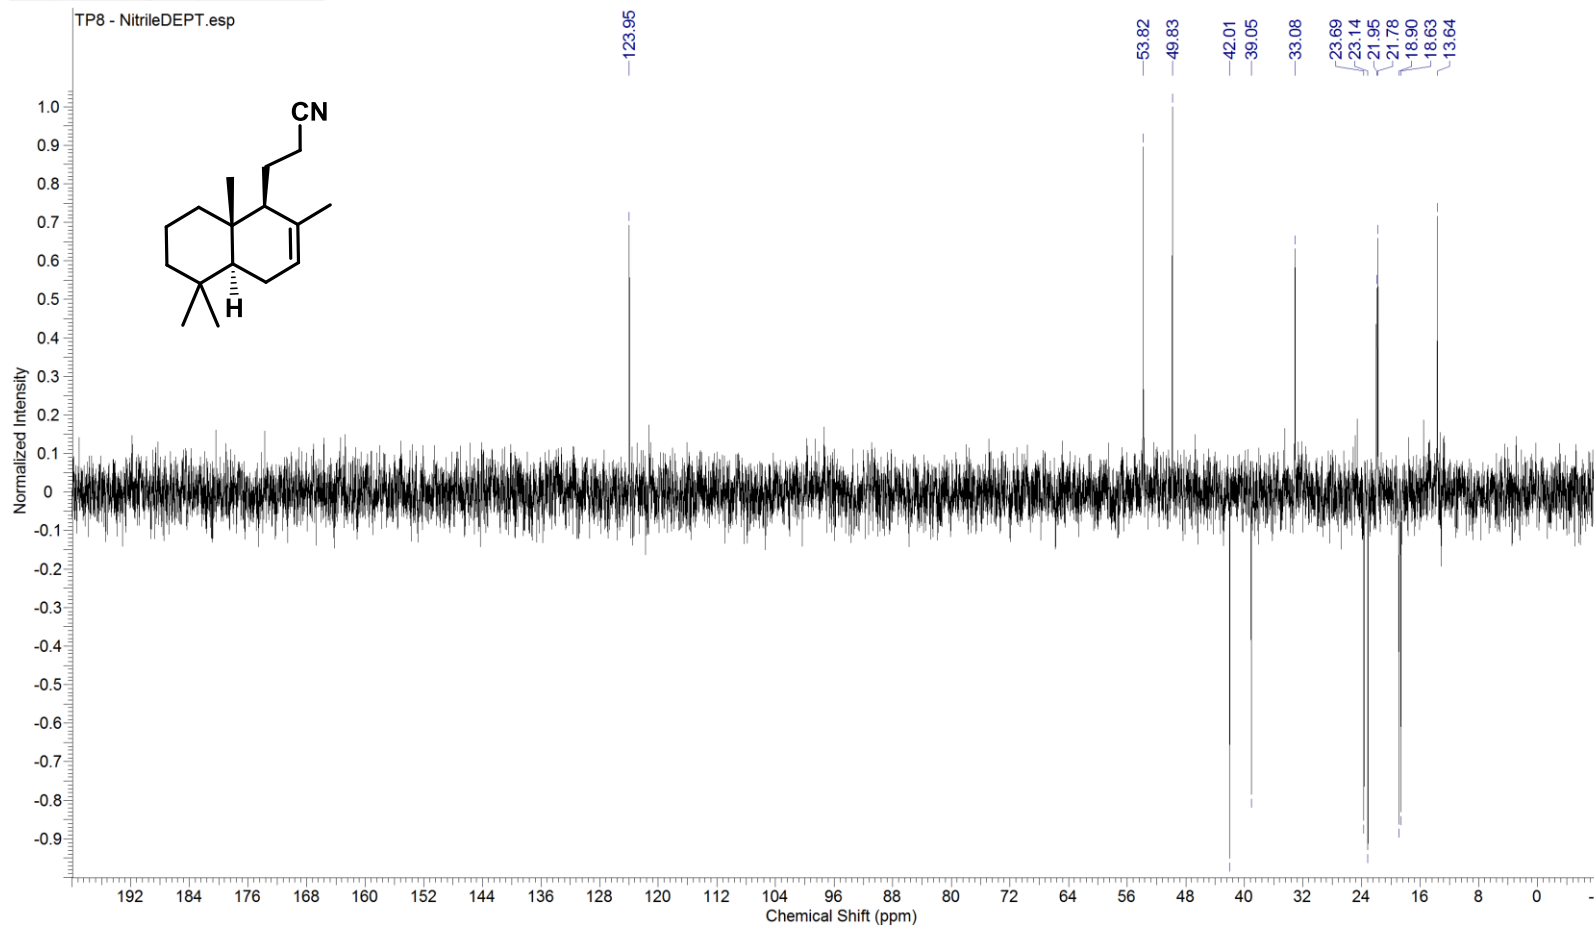

**Figure S21.** DEPT 135 NMR spectrum ( $\text{CDCl}_3$ , 62.9 MHz) of compound **13**.

**3-((1*S*,4*aS*,8*aS*)-2,5,5,8*a*-tetramethyl-1,4,4*a*,5,6,7,8,8*a*-octahydronaphthalen-1-yl)propanal (**15**).**

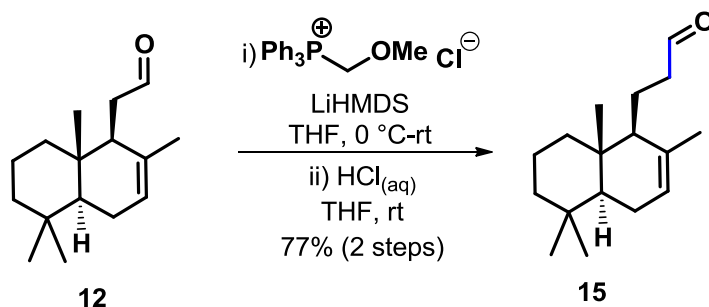

To a suspension of (methoxymethyl)triphenylphosphonium chloride (163 mg, 0.46 mmol, 2 equiv) in dry THF (2 mL) was added a solution of LiHMDS (1 M in THF, 345  $\mu\text{L}$ , 0.345 mmol, 1.5 equiv) at 0 ° and the reaction was stirred at this temperature for 30 min. After this period, the brownish mixture was transferred *via* cannula to a flask containing a solution of aldehyde **12** (53.9 mg, 0.230 mmol, 1 equiv) in dry THF (2 mL) at 0 °C, and the resulting mixture was stirred for 30 min at 0 °C and 4 h at room temperature. Next, the reaction was quenched by addition of saturated aqueous solution of  $\text{NH}_4\text{Cl}$  (10 mL), and was extracted with EtOAc (10 mL). The organic phase was washed with brine (5 mL), dried over anhydrous  $\text{MgSO}_4$  and concentrated under reduced pressure. The residue obtained was subjected to flash chromatography ( $\text{SiO}_2$ , hexanes/EtOAc 95:5) to afford a mixture of (*E*) and (*Z*)-enol ethers, which were immediately used in the next reaction.

**TLC** ( $\text{SiO}_2$ ):  $R_f = 0.45$  (hexanes:EtOAc 95:5).

The mixture of (*E*) and (*Z*)-enol ethers obtained above was diluted in THF (2 mL) and a solution of HCl (6 M in  $\text{H}_2\text{O}$ , 0.4 mL, 2.4 mmol, 10 equiv) was added dropwise at 0 °C. The mixture was stirred at room temperature for 2 h, and was diluted with  $\text{H}_2\text{O}$  (8 mL), followed by an extraction with EtOAc (8 mL). The organic phase was washed with brine (5 mL), dried over anhydrous  $\text{Na}_2\text{SO}_4$  and concentrated under reduced pressure. The residue was subjected to flash chromatography ( $\text{SiO}_2$ , hexanes/EtOAc 95:5) to give aldehyde **15** (44.0 mg, 0.177 mmol) as a colorless oil in 77% yield.

**TLC** ( $\text{SiO}_2$ ):  $R_f = 0.30$  (hexanes/EtOAc 95:5);

$[\alpha]_D^{25} = +21$  ( $c$  1.0,  $\text{CHCl}_3$ );

**IR** (ATR,  $\text{cm}^{-1}$ ): 2923, 2846, 1726, 1457, 1387, 1050, 983;

**$^1\text{H}$  NMR** (250 MHz,  $\text{CDCl}_3$ ):  $\delta$  0.79 (s, 3H), 0.85 (s, 3H), 0.88 (s, 3H), 0.81-1.04 (m, 1H), 1.15 (dd,  $J = 11.8, 5.0$  Hz, 2H), 1.66 (s, 3H), 1.36-1.71 (m, 5H), 1.79-2.03 (m, 4H), 2.43 (dddd,  $J = 17.4, 8.8, 6.5, 1.9$  Hz, 1H), 2.65 (dddd,  $J = 17.2, 9.9, 5.5, 1.6$  Hz, 1H), 5.42 (br. s, 1H), 9.76 (t,  $J = 1.7$  Hz, 1H);

**$^{13}\text{C}$  NMR** (62.9 MHz,  $\text{CDCl}_3$ ):  $\delta$  13.6 ( $\text{CH}_3$ ), 18.7 ( $\text{CH}_2$ ), 19.1 ( $\text{CH}_2$ ), 21.8 ( $\text{CH}_3$ ), 22.1 ( $\text{CH}_3$ ), 23.7 ( $\text{CH}_2$ ), 32.9 (C), 33.1 ( $\text{CH}_3$ ), 36.9 (C), 39.4 ( $\text{CH}_2$ ), 42.2 ( $\text{CH}_2$ ), 46.0 ( $\text{CH}_2$ ), 50.0 (CH), 54.3 (CH), 123.2 (CH), 134.1 (C), 202.4 (CH);

**HRMS** (ESI +):  $m/z$  calculated for  $\text{C}_{17}\text{H}_{28}\text{ONa}^+$   $[\text{M}+\text{Na}]^+$  271.2032, found 271.2013.



|                        |                      |              |       |                      |                                                                  |                   |          |
|------------------------|----------------------|--------------|-------|----------------------|------------------------------------------------------------------|-------------------|----------|
| Acquisition Time (sec) | 1.0879               | Comment      | LN227 | Date                 | 02 Aug 2016 16:09:52                                             |                   |          |
| Date Stamp             | 02 Aug 2016 16:09:52 |              |       | File Name            | C:\Users\Luiz\Desktop\Luiz\PhD\NMR\ago16\ago02\ftH3\2\PDATA\1\1r |                   |          |
| Frequency (MHz)        | 62.90                | Nucleus      | 13C   | Number of Transients | 27                                                               | Origin            | spect    |
| Owner                  | root                 | Points Count | 32768 | Pulse Sequence       | zgpg30                                                           | Receiver Gain     | 362.00   |
| Solvent                | CHLOROFORM-d         |              |       | Spectrum Offset (Hz) | 6289.0518                                                        | Spectrum Type     | STANDARD |
| Temperature (degree C) | 25.260               |              |       |                      |                                                                  | SW(cyclical) (Hz) | 15060.24 |
|                        |                      |              |       |                      |                                                                  | Sweep Width (Hz)  | 15059.78 |

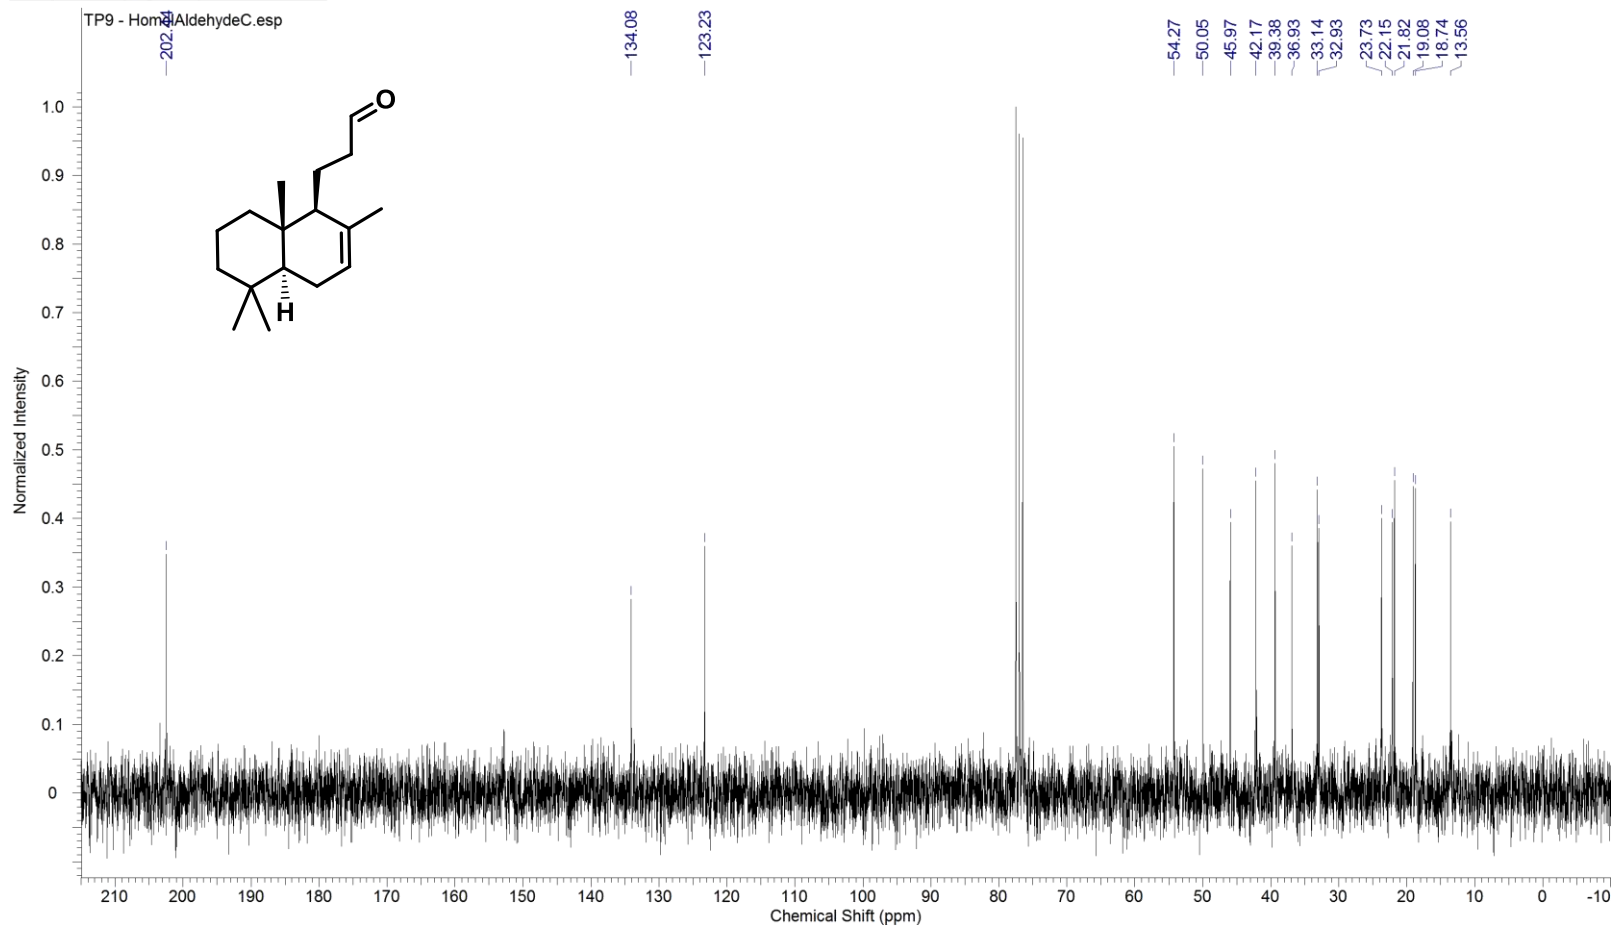

**Figure S23.**  $^{13}\text{C}$  NMR spectrum ( $\text{CDCl}_3$ , 62.9 MHz) of compound **15**.

|                        |                      |              |       |                      |                                                                  |                   |          |
|------------------------|----------------------|--------------|-------|----------------------|------------------------------------------------------------------|-------------------|----------|
| Acquisition Time (sec) | 0.5439               | Comment      | LN227 | Date                 | 02 Aug 2016 16:07:44                                             |                   |          |
| Date Stamp             | 02 Aug 2016 16:07:44 |              |       | File Name            | C:\Users\Luiz\Desktop\Luiz\PhD\NMR\ago16\ago02\ftH3\3\PDATA\1\1r |                   |          |
| Frequency (MHz)        | 62.90                | Nucleus      | 13C   | Number of Transients | 42                                                               | Origin            | spect    |
| Owner                  | root                 | Points Count | 32768 | Pulse Sequence       | dept135                                                          | Receiver Gain     | 2580.30  |
| Solvent                | CHLOROFORM-d         |              |       | Spectrum Offset (Hz) | 6289.0518                                                        | Spectrum Type     | DEPT135  |
| Temperature (degree C) | 25.160               |              |       |                      |                                                                  | SW(cyclical) (Hz) | 15060.24 |
|                        |                      |              |       |                      |                                                                  | Sweep Width (Hz)  | 15059.78 |

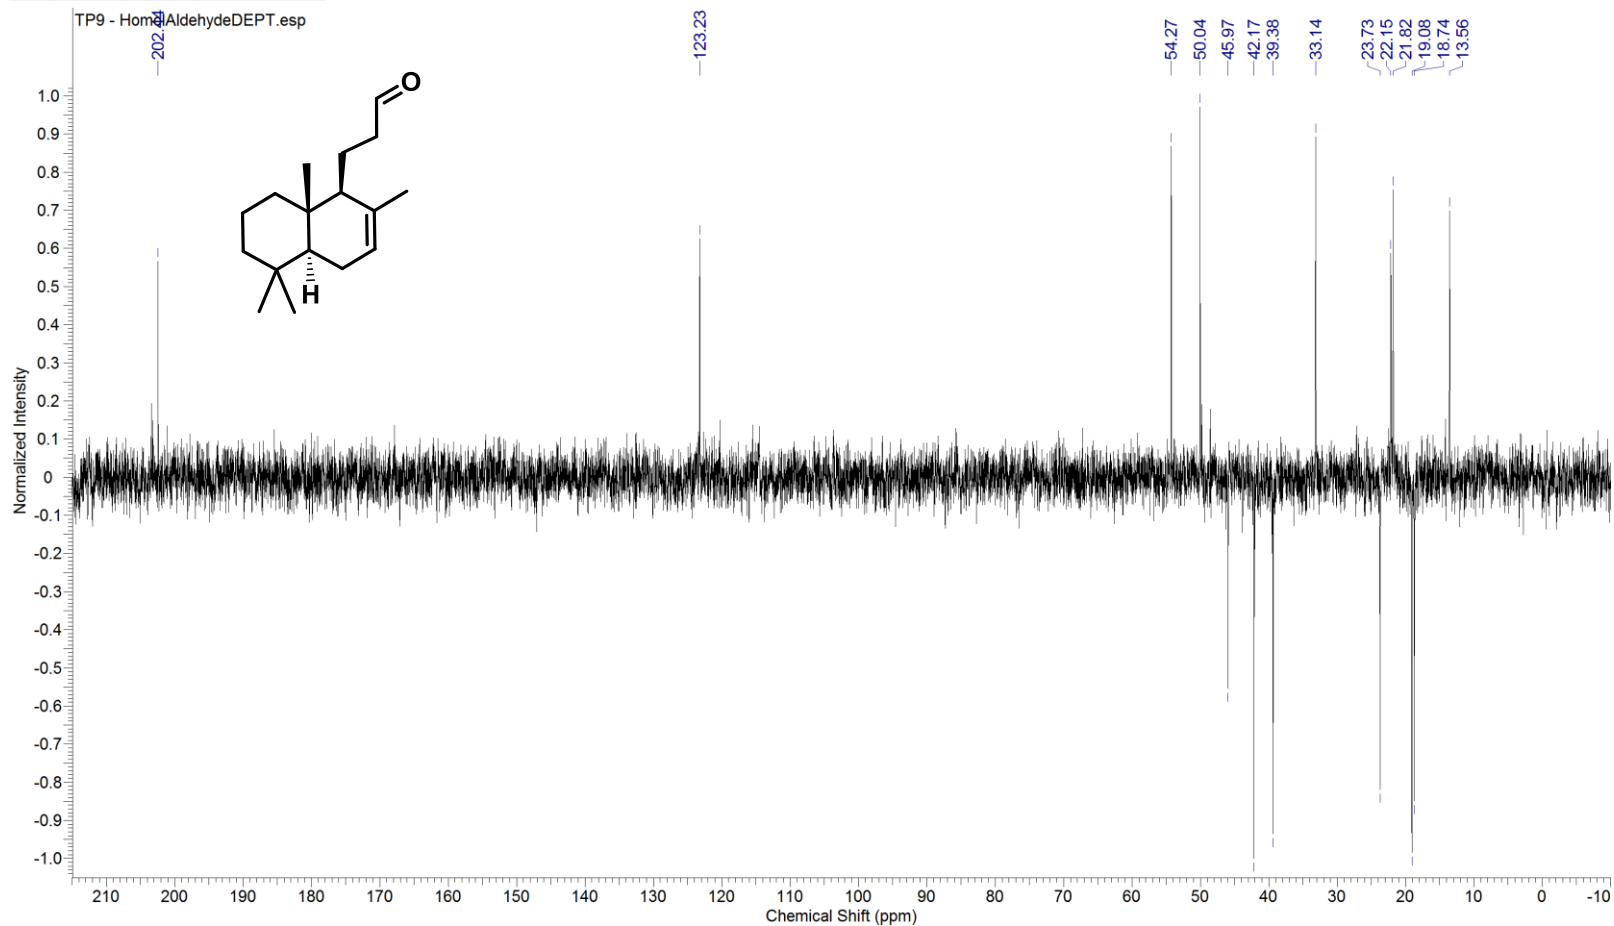

**Figure S24.** DEPT 135 NMR spectrum ( $\text{CDCl}_3$ , 62.9 MHz) of compound **15**.

(4a*S*,5*S*,8a*S*)-5-(but-3-yn-1-yl)-1,1,4a,6-tetramethyl-1,2,3,4,4a,5,8,8a-octahydronaphthalene (**16**).

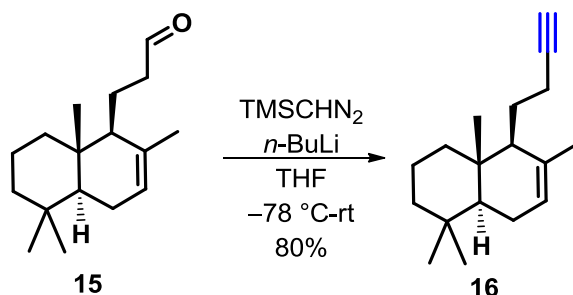

TMSCHN<sub>2</sub> solution (2 M in hexanes, 0.76 mL, 1.52 mmol, 4 equiv) was added to THF (5 mL), the resulting mixture was cooled to  $-78\text{ }^\circ\text{C}$ , then a solution of *n*-BuLi (2.5 M in hexanes, 0.46 mL, 1.15 mmol, 3 equiv) was added dropwisely and the reaction was stirred at the same temperature for 30 min. Next, a solution of aldehyde **15** (94.4 mg, 0.38 mmol, 1 equiv) in THF (3 mL) was added to the reaction and the resulting mixture was stirred at  $-78\text{ }^\circ\text{C}$  for 1 h, and then at room temperature for 1 h. The reaction was quenched by addition of saturated aqueous solution of NH<sub>4</sub>Cl (10 mL), followed by the extraction with Et<sub>2</sub>O (2 x 10 mL). The combined organic extracts were dried over anhydrous MgSO<sub>4</sub> and concentrated under reduced pressure. The residue was subjected to flash chromatography (SiO<sub>2</sub>, hexanes) to afford the alkyne **16** (74.4 mg, 0.30 mmol) as a colorless oil in 80% yield.

**TLC** (SiO<sub>2</sub>): R<sub>f</sub> = 0.72 (hexanes);

[ $\alpha$ ]<sub>D</sub><sup>25</sup> = +12 (*c* 1.0, CHCl<sub>3</sub>);

**IR** (ATR, cm<sup>-1</sup>): 3312, 2923, 2847, 2118, 1457, 1387, 1050, 983;

**<sup>1</sup>H NMR** (250 MHz, CDCl<sub>3</sub>):  $\delta$  0.76 (s, 3H), 0.86 (s, 3H), 0.88 (s, 3H), 0.80-1.29 (m, 4H), 1.96 (t, *J* = 2.6 Hz, 1H), 1.35-2.06 (m, 11H), 2.10-2.27 (m, 1H), 2.37 (dddd, *J* = 16.8, 9.0, 5.0, 2.5 Hz, 1H), 5.40 (br. s, 1H);

**<sup>13</sup>C NMR** (62.9 MHz, CDCl<sub>3</sub>):  $\delta$  13.6 (CH<sub>3</sub>), 18.7 (CH<sub>2</sub>), 20.3 (CH<sub>2</sub>), 21.8 (CH<sub>3</sub>), 22.1 (CH<sub>3</sub>), 23.8 (CH<sub>2</sub>), 26.2 (CH<sub>2</sub>), 32.9 (C), 33.1 (CH<sub>3</sub>), 36.6 (C), 39.1 (CH<sub>2</sub>), 42.2 (CH<sub>2</sub>), 50.0 (CH), 53.7 (CH), 68.3 (CH), 84.8 (C), 122.8 (CH), 134.5 (C);

**GC/MS** (EI): *m/z* calculated for C<sub>17</sub>H<sub>25</sub> [M-CH<sub>3</sub>]<sup>+</sup> 229, found: 229.



|                        |                      |              |       |                      |                                                                  |                   |          |
|------------------------|----------------------|--------------|-------|----------------------|------------------------------------------------------------------|-------------------|----------|
| Acquisition Time (sec) | 3.1654               | Comment      | LN378 | Date                 | 09 Dec 2016 16:42:08                                             |                   |          |
| Date Stamp             | 09 Dec 2016 16:42:08 |              |       | File Name            | C:\Users\Luiz\Desktop\Luiz\PhD\NMR\dez16\dez09\ftH2\1\PDATA\1\1r |                   |          |
| Frequency (MHz)        | 250.13               | Nucleus      | 1H    | Number of Transients | 17                                                               | Origin            | spect    |
| Owner                  | root                 | Points Count | 32768 | Pulse Sequence       | zg30                                                             | Receiver Gain     | 362.00   |
| Solvent                | CHLOROFORM-d         |              |       | Spectrum Offset (Hz) | 1544.6561                                                        | Spectrum Type     | STANDARD |
| Temperature (degree C) | 25.160               |              |       |                      |                                                                  | SW(cyclical) (Hz) | 5175.98  |
|                        |                      |              |       |                      |                                                                  | Sweep Width (Hz)  | 5175.83  |

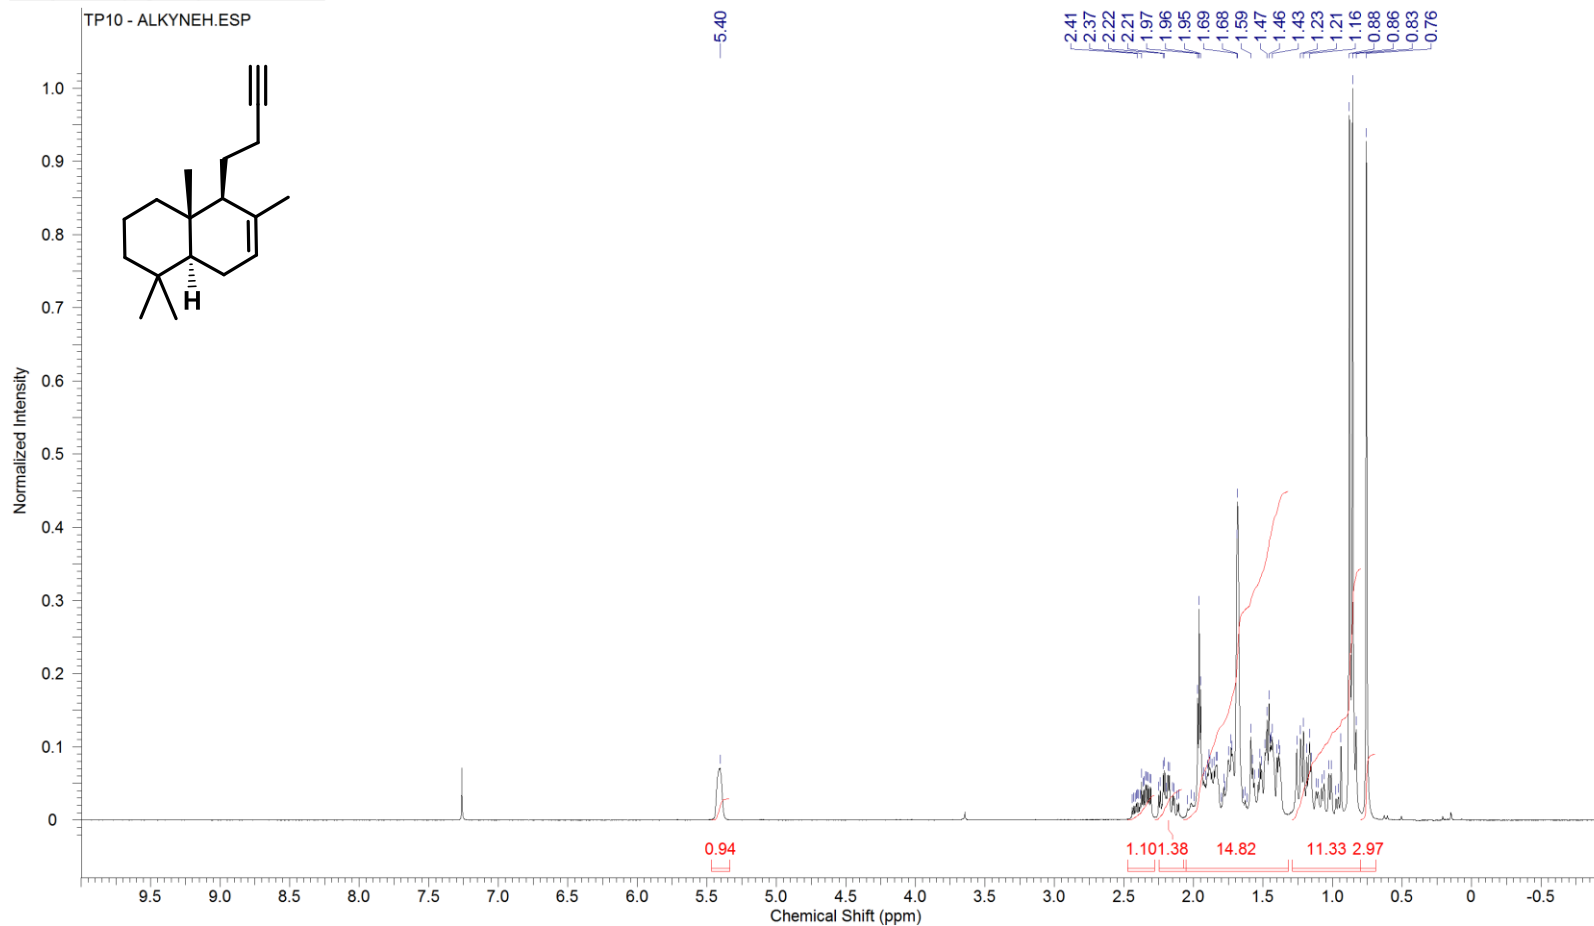

**Figure S25.**  $^1\text{H}$  NMR spectrum ( $\text{CDCl}_3$ , 250 MHz) of compound **16**.

|                        |                      |              |       |                      |                                                                  |                   |          |
|------------------------|----------------------|--------------|-------|----------------------|------------------------------------------------------------------|-------------------|----------|
| Acquisition Time (sec) | 1.0879               | Comment      | LN378 | Date                 | 09 Dec 2016 16:46:24                                             |                   |          |
| Date Stamp             | 09 Dec 2016 16:46:24 |              |       | File Name            | C:\Users\Luiz\Desktop\Luiz\PhD\NMR\dez16\dez09\ftH2\2\PDATA\1\1r |                   |          |
| Frequency (MHz)        | 62.90                | Nucleus      | 13C   | Number of Transients | 120                                                              | Origin            | spect    |
| Owner                  | root                 | Points Count | 32768 | Pulse Sequence       | zgpg30                                                           | Receiver Gain     | 645.10   |
| Solvent                | CHLOROFORM-d         |              |       | Spectrum Offset (Hz) | 6289.0518                                                        | Spectrum Type     | STANDARD |
| Temperature (degree C) | 25.160               |              |       |                      |                                                                  | SW(cyclical) (Hz) | 15060.24 |
|                        |                      |              |       |                      |                                                                  | Sweep Width (Hz)  | 15059.78 |

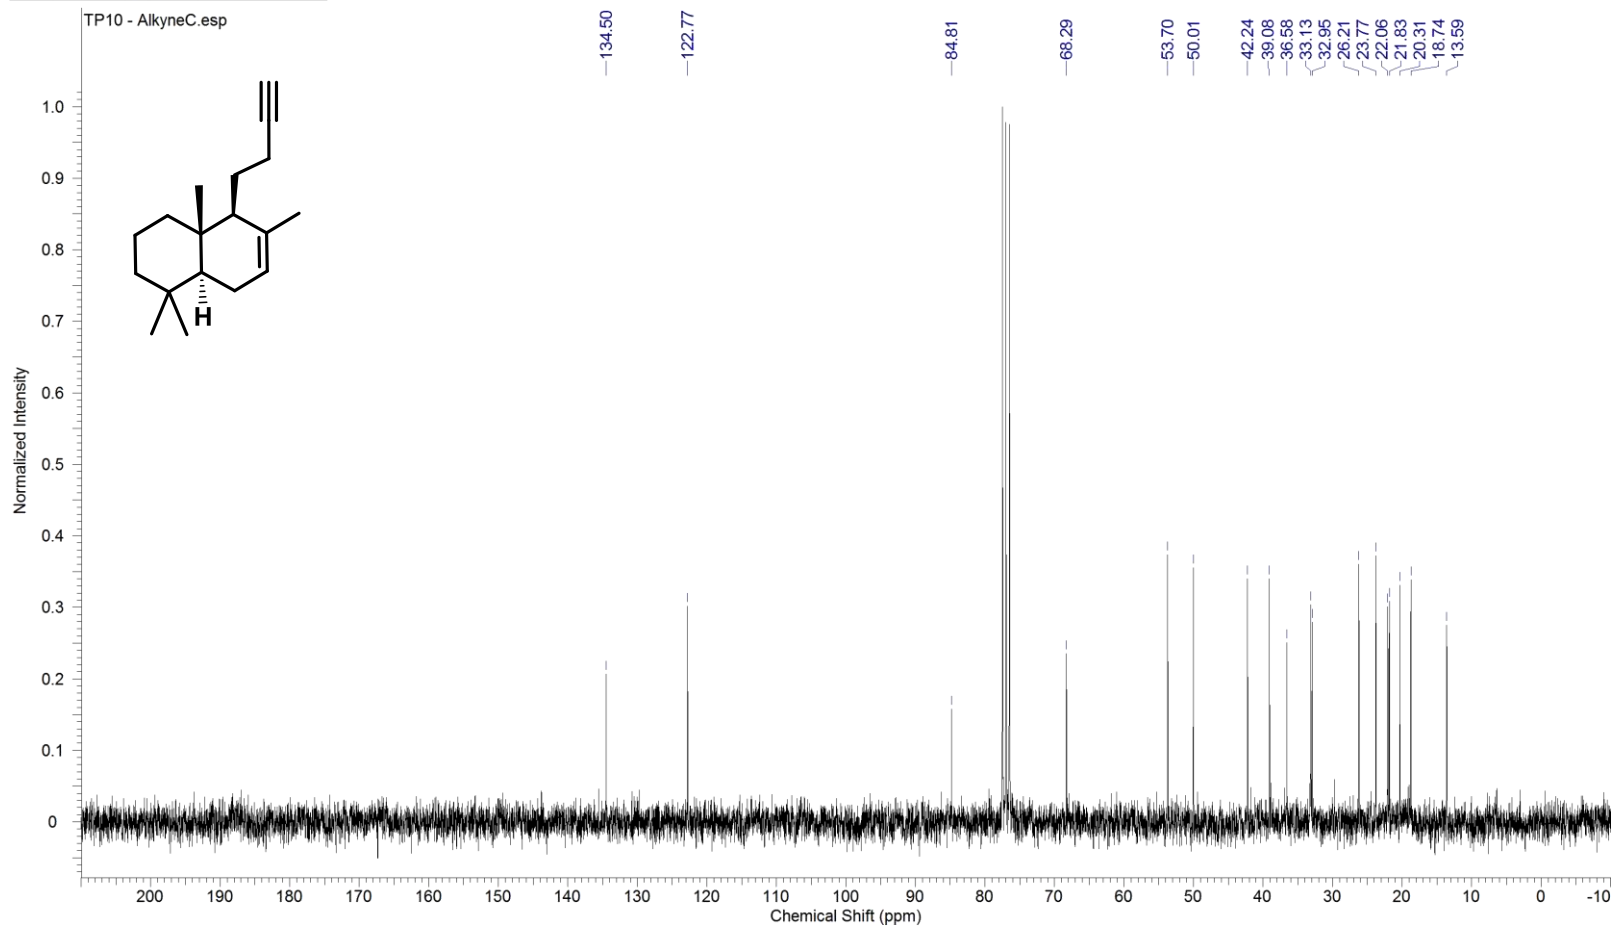

**Figure S26.**  $^{13}\text{C}$  NMR spectrum ( $\text{CDCl}_3$ , 62.9 MHz) of compound **16**.

|                        |                      |              |       |                      |                                                                  |                   |          |
|------------------------|----------------------|--------------|-------|----------------------|------------------------------------------------------------------|-------------------|----------|
| Acquisition Time (sec) | 0.5439               | Comment      | LN378 | Date                 | 09 Dec 2016 16:52:48                                             |                   |          |
| Date Stamp             | 09 Dec 2016 16:52:48 |              |       | File Name            | C:\Users\Luiz\Desktop\Luiz\PhD\NMR\dez16\dez09\ftH2\3\PDATA\1\1r |                   |          |
| Frequency (MHz)        | 62.90                | Nucleus      | 13C   | Number of Transients | 163                                                              | Origin            | spect    |
| Owner                  | root                 | Points Count | 32768 | Pulse Sequence       | dept135                                                          | Receiver Gain     | 16384.00 |
| Solvent                | CHLOROFORM-d         |              |       | Spectrum Offset (Hz) | 6289.0518                                                        | Spectrum Type     | DEPT135  |
| Temperature (degree C) | 25.160               |              |       |                      |                                                                  | SW(cyclical) (Hz) | 15060.24 |
|                        |                      |              |       |                      |                                                                  | Sweep Width (Hz)  | 15059.78 |

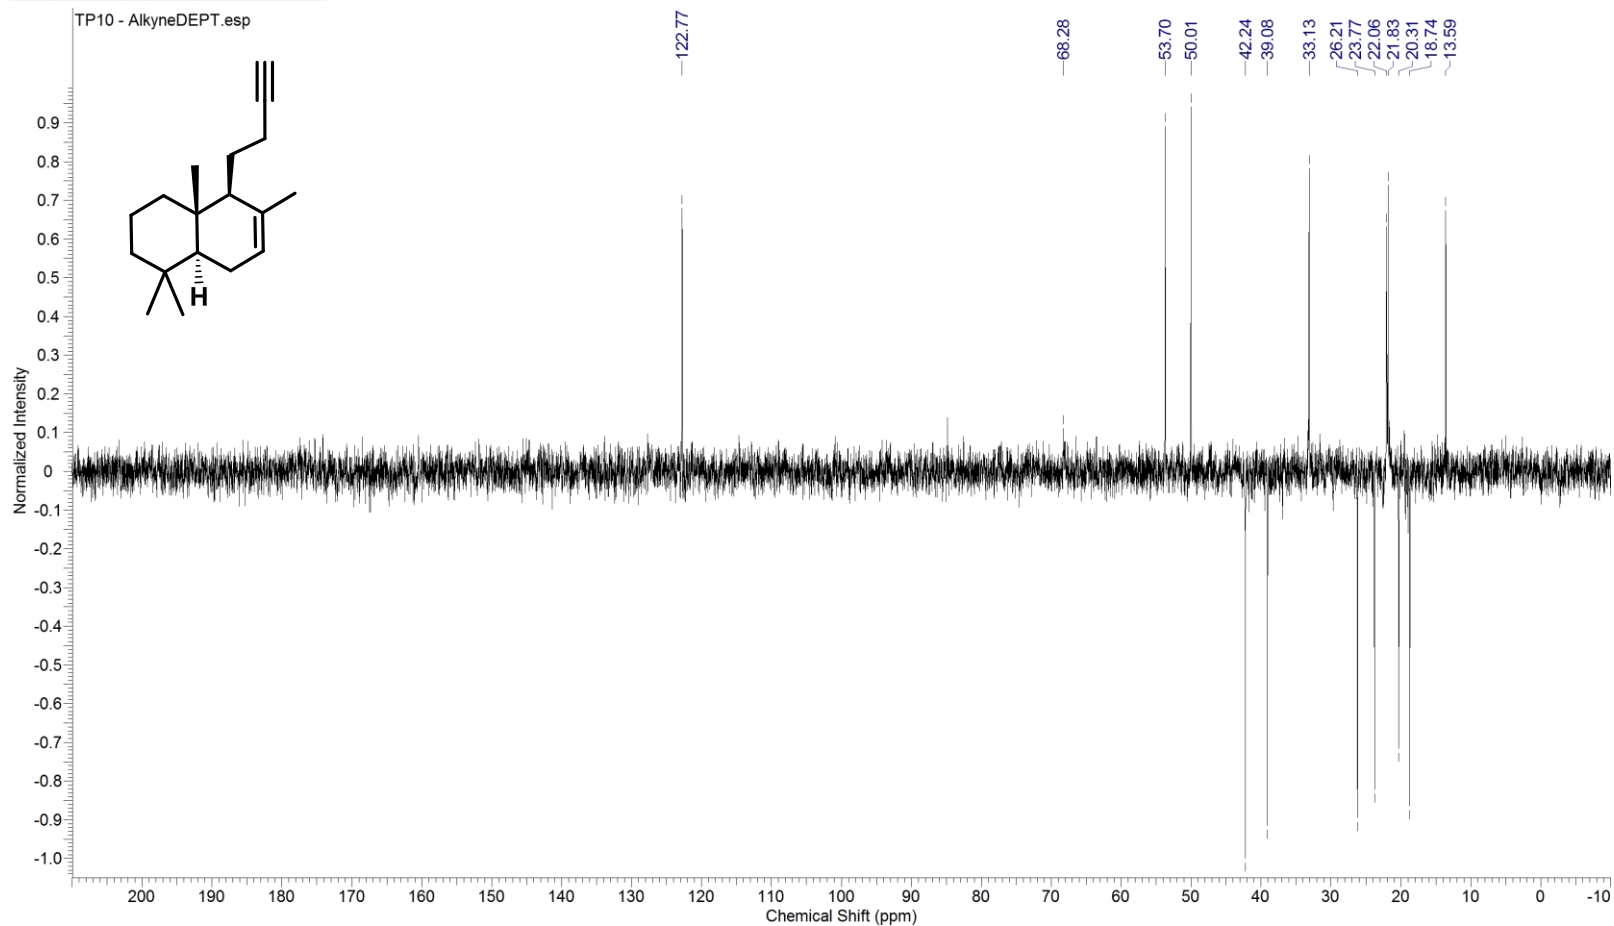

**Figure S27.** DEPT 135 NMR spectrum ( $\text{CDCl}_3$ , 62.9 MHz) of compound **16**.

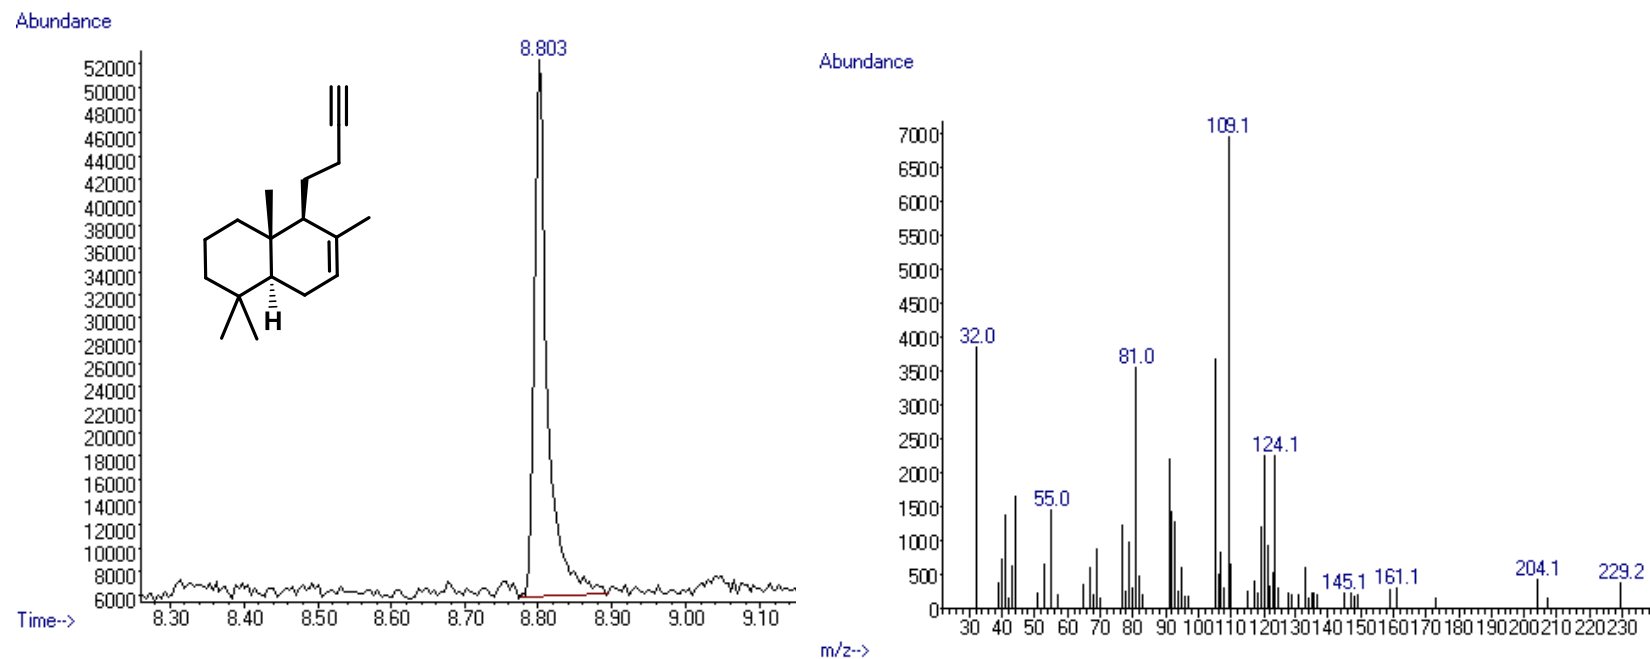

$t_R = 8.803 \text{ min}$ ,  $[M-CH_3]^+ = 229$

**Figure S28.** GC/MS analysis of compound 16.

**4-((1*S*,4*aS*,8*aS*)-2,5,5,8*a*-tetramethyl-1,4,4*a*,5,6,7,8,8*a*-octahydronaphthalen-1-yl)butan-2-one (**14**).**

Procedure A:

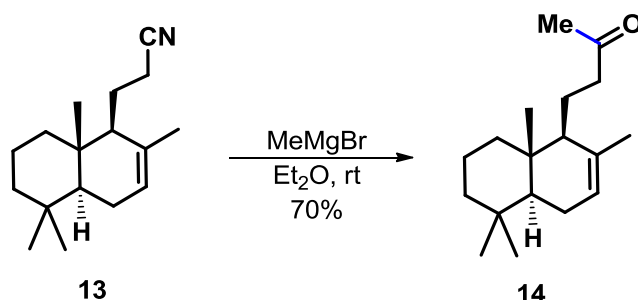

MeMgBr solution (3 M in Et<sub>2</sub>O, 1.6 mL, 4.8 mmol, 3 equiv) was added dropwise to a solution of nitrile **13** (393 mg, 1.6 mmol, 1 equiv) in dry Et<sub>2</sub>O (15 mL) at 0 °C, the reaction was warmed to room temperature and was stirred for 16 h. The reaction was quenched by addition of saturated aqueous solution of NH<sub>4</sub>Cl (10 mL), followed by extraction with EtOAc (2 x 20 mL). The combined organic extracts were dried over anhydrous MgSO<sub>4</sub> and concentrated under reduced pressure. The residue was subjected to flash chromatography (SiO<sub>2</sub>, hexanes/EtOAc 90:10) to give the ketone **14** (295 mg, 1.1 mmol) as a colorless oil in 70% yield.

**Note:** Nitrile **13** and ketone **14** presented similar R<sub>f</sub> using TLC with SiO<sub>2</sub> and different eluents, the progress of reaction was monitored by GC/MS analysis.

Procedure B:

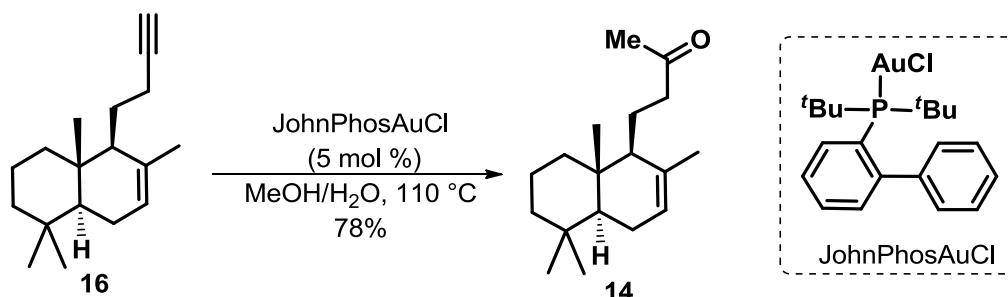

A pressure tube was charged with alkyne **16** (16.0 mg, 64 μmol, 1 equiv), methanol (2 mL) and H<sub>2</sub>O (1 mL) were added followed by JohnPhosAuCl (1.7 mg, 3.2 μmol, 5 mol %), the pressure tube was sealed and heated at 110 °C for 90 min. The mixture was cooled to room temperature, then methanol was removed under reduced pressure. The remaining residue was extracted with CH<sub>2</sub>Cl<sub>2</sub> (2 x 5 mL), the combined organic phases were dried over anhydrous Na<sub>2</sub>SO<sub>4</sub> and concentrated under reduced pressure. The residue was subjected to flash chromatography (SiO<sub>2</sub>, hexanes/EtOAc 95:5 to 90:10) to give ketone **14** (13.1 mg, 50 μmol) as a colorless oil in 78% yield.

**TLC (SiO<sub>2</sub>):** R<sub>f</sub> = 0.40 (hexanes/EtOAc 90:10);

**[α]<sub>D</sub><sup>25</sup>** = +20 (c 1.0, CHCl<sub>3</sub>);

**IR (ATR, cm<sup>-1</sup>):** 2924, 2851, 1717, 1662, 1463, 1365, 1331, 1162;

**<sup>1</sup>H NMR** (250 MHz, CDCl<sub>3</sub>): δ 0.77 (s, 3H), 0.85 (s, 3H), 0.88 (s, 3H), 0.81-1.24 (m, 4H), 1.66 (s, 3H), 1.33-1.71 (m, 4H), 1.72-2.05 (m, 4H), 2.14 (s, 3H), 2.41 (ddd, *J* = 16.1, 9.9, 6.0 Hz, 1H), 2.64 (ddd, *J* = 16.7, 10.7, 5.3 Hz, 1H), 5.41 (br. s, 1H);

**<sup>13</sup>C NMR** (62.9 MHz, CDCl<sub>3</sub>): δ 13.6 (CH<sub>3</sub>), 18.7 (CH<sub>2</sub>), 20.9 (CH<sub>2</sub>), 21.8 (CH<sub>3</sub>), 22.1 (CH<sub>3</sub>), 23.7 (CH<sub>2</sub>), 29.9 (CH<sub>2</sub>), 32.9 (C), 33.2 (CH<sub>3</sub>), 36.9 (C), 39.3 (CH<sub>2</sub>), 42.2 (CH<sub>2</sub>), 45.9 (CH<sub>2</sub>), 50.1 (CH), 54.3 (CH), 123.0 (CH), 134.4 (C), 208.8 (C);

**HRMS (ESI +):** *m/z* calculated for C<sub>18</sub>H<sub>30</sub>ONa<sup>+</sup> [M+Na]<sup>+</sup> 285.2189, found 285.2200.

|                        |                      |              |       |                      |                                                                  |                   |          |
|------------------------|----------------------|--------------|-------|----------------------|------------------------------------------------------------------|-------------------|----------|
| Acquisition Time (sec) | 3.1654               | Comment      | LN499 | Date                 | 20 Mar 2017 08:31:12                                             |                   |          |
| Date Stamp             | 20 Mar 2017 08:31:12 |              |       | File Name            | C:\Users\Luiz\Desktop\Luiz\PhD\NMR\mar17\mar20\ftH1\1\PDATA\1\1r |                   |          |
| Frequency (MHz)        | 250.13               | Nucleus      | 1H    | Number of Transients | 9                                                                | Origin            | spect    |
| Owner                  | root                 | Points Count | 32768 | Pulse Sequence       | zg30                                                             | Receiver Gain     | 574.70   |
| Solvent                | CHLOROFORM-d         |              |       | Spectrum Offset (Hz) | 1544.6561                                                        | Spectrum Type     | STANDARD |
| Temperature (degree C) | 25.160               |              |       |                      |                                                                  | SW(cyclical) (Hz) | 5175.98  |
|                        |                      |              |       |                      |                                                                  | Sweep Width (Hz)  | 5175.83  |

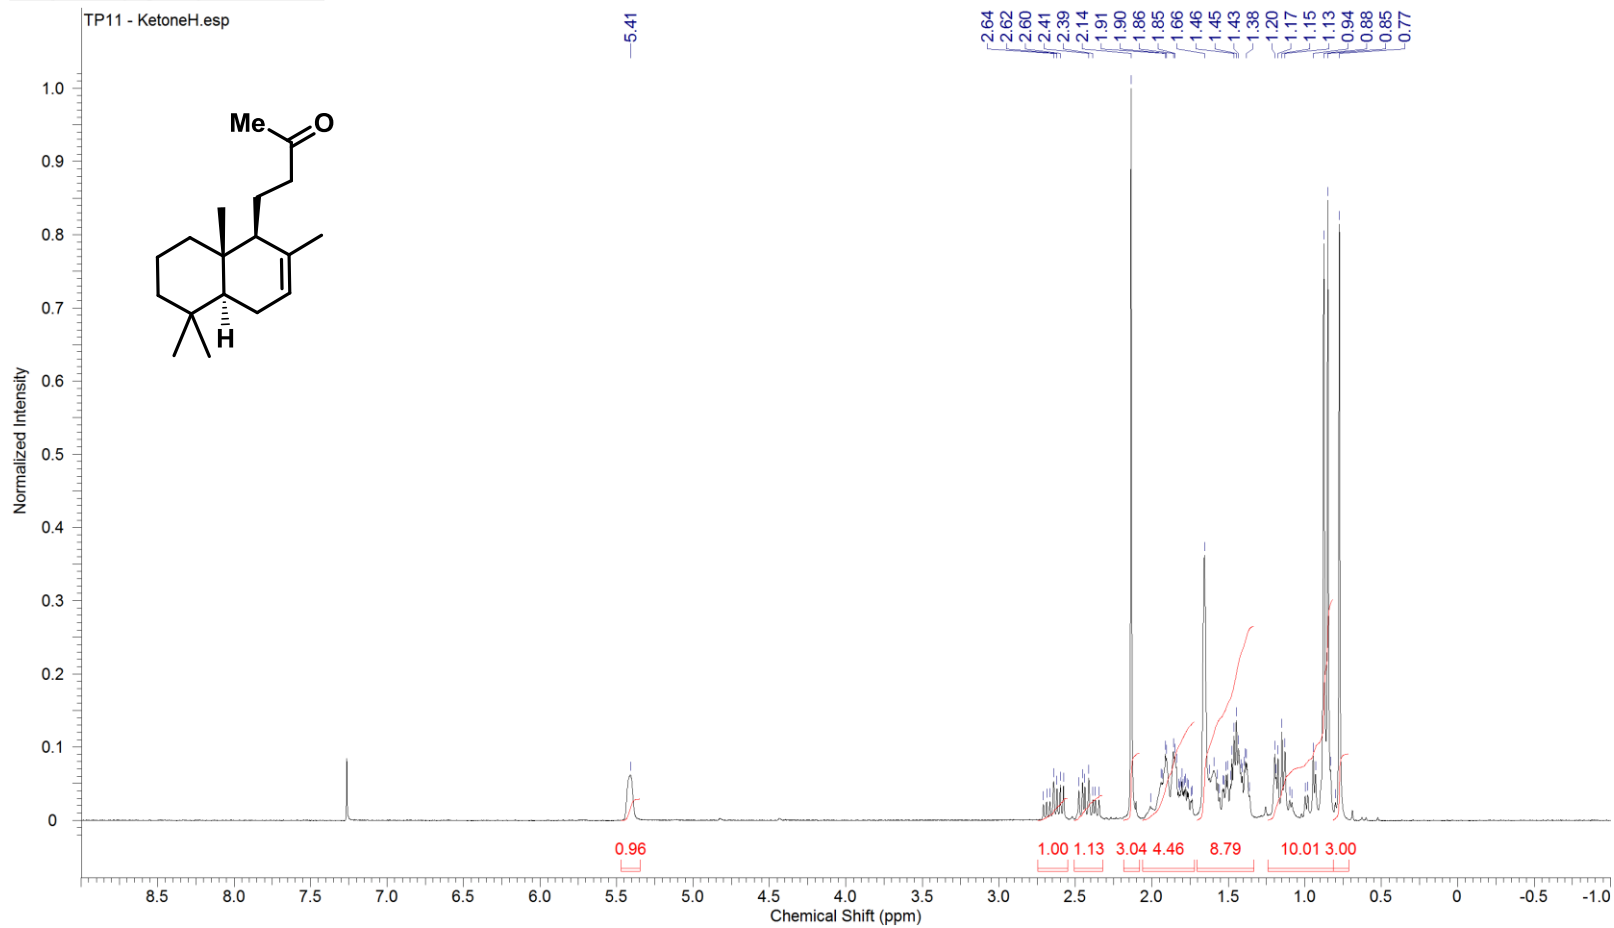

**Figure S29.**  $^1\text{H}$  NMR spectrum ( $\text{CDCl}_3$ , 250 MHz) of compound **14**.

|                        |                      |              |         |                      |                                                                  |                   |          |
|------------------------|----------------------|--------------|---------|----------------------|------------------------------------------------------------------|-------------------|----------|
| Acquisition Time (sec) | 1.0879               | Comment      | LN232-I | Date                 | 03 Aug 2016 13:12:48                                             |                   |          |
| Date Stamp             | 03 Aug 2016 13:12:48 |              |         | File Name            | C:\Users\Luiz\Desktop\Luiz\PhD\NMR\ago16\ago03\ftH2\3\PDATA\1\1r |                   |          |
| Frequency (MHz)        | 62.90                | Nucleus      | 13C     | Number of Transients | 70                                                               | Origin            | spect    |
| Owner                  | root                 | Points Count | 32768   | Pulse Sequence       | zgpg30                                                           | Receiver Gain     | 512.00   |
| Solvent                | CHLOROFORM-d         |              |         | Spectrum Offset (Hz) | 6289.0518                                                        | Spectrum Type     | STANDARD |
| Temperature (degree C) | 25.160               |              |         |                      |                                                                  | SW(cyclical) (Hz) | 15060.24 |
|                        |                      |              |         |                      |                                                                  | Sweep Width (Hz)  | 15059.78 |

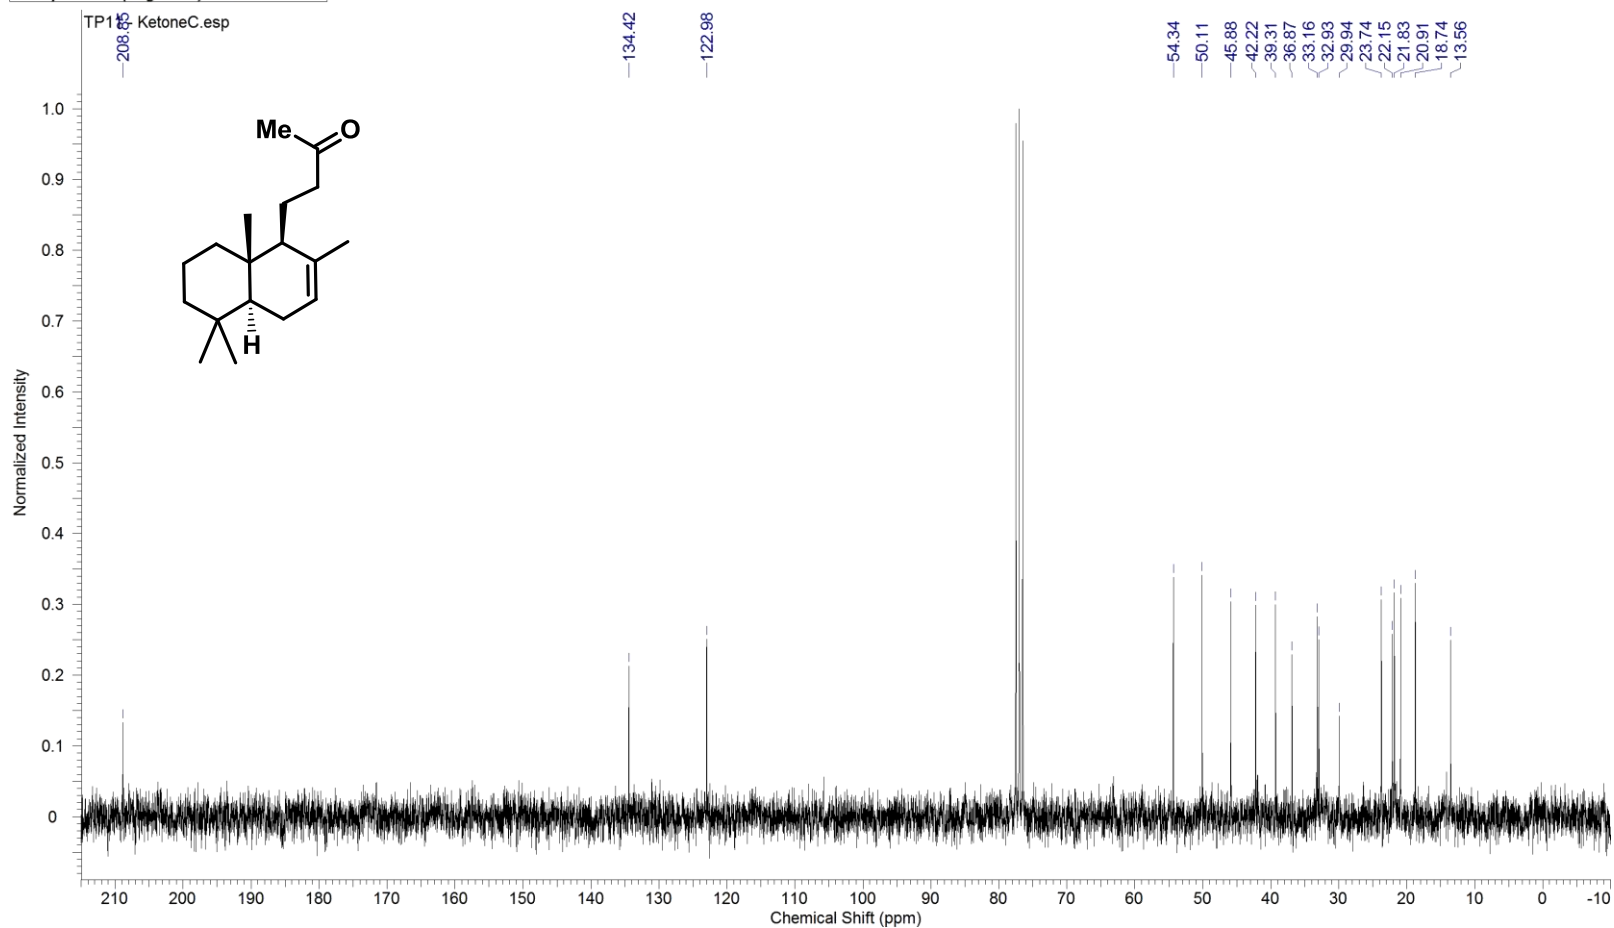

**Figure S30.**  $^{13}\text{C}$  NMR spectrum ( $\text{CDCl}_3$ , 62.9 MHz) of compound **14**.



|                        |                      |              |       |                      |                                                                  |                   |          |
|------------------------|----------------------|--------------|-------|----------------------|------------------------------------------------------------------|-------------------|----------|
| Acquisition Time (sec) | 0.5439               | Comment      | LN246 | Date                 | 22 Aug 2016 19:26:08                                             |                   |          |
| Date Stamp             | 22 Aug 2016 19:26:08 |              |       | File Name            | C:\Users\Luiz\Desktop\Luiz\PhD\NMR\ago16\ago22\ftH1\2\PDATA\1\1r |                   |          |
| Frequency (MHz)        | 62.90                | Nucleus      | 13C   | Number of Transients | 166                                                              | Origin            | spect    |
| Owner                  | root                 | Points Count | 32768 | Pulse Sequence       | dept135                                                          | Receiver Gain     | 2580.30  |
| Solvent                | CHLOROFORM-d         |              |       | Spectrum Offset (Hz) | 6289.0518                                                        | Spectrum Type     | DEPT135  |
| Temperature (degree C) | 25.160               |              |       |                      |                                                                  | SW(cyclical) (Hz) | 15060.24 |
|                        |                      |              |       |                      |                                                                  | Sweep Width (Hz)  | 15059.78 |

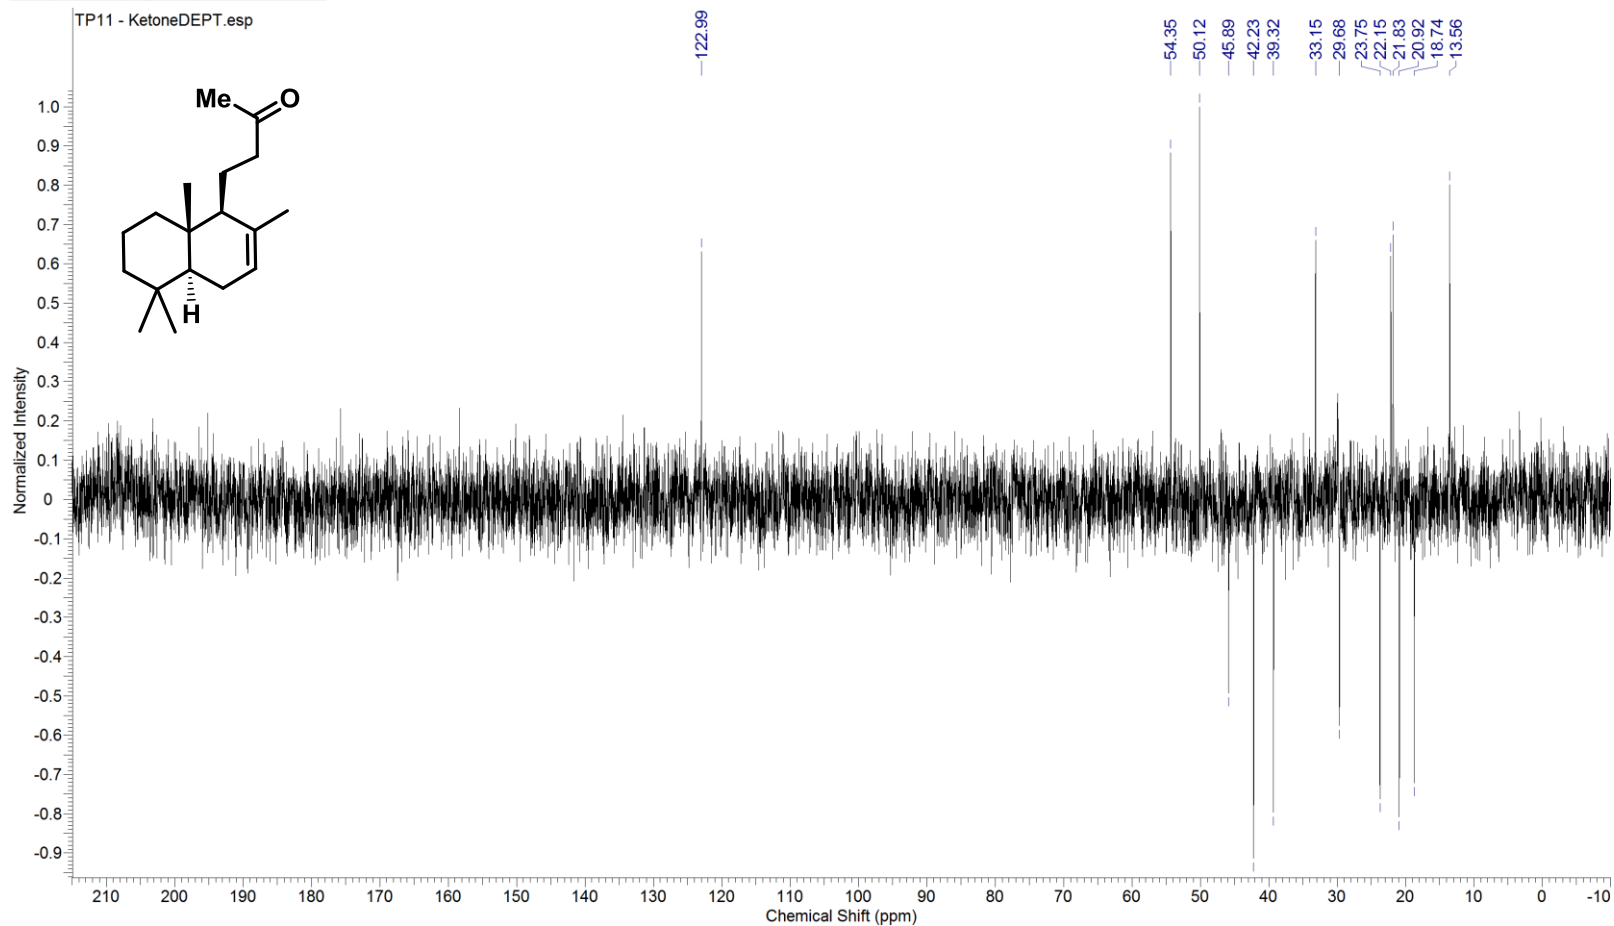

**Figure S31.** DEPT 135 NMR spectrum (CDCl<sub>3</sub>, 62.9 MHz) of compound **14**.

**(E)-ethyl 3-methyl-5-((1*S*,4*aS*,8*aS*)-2,5,5,8*a*-tetramethyl-1,4,4*a*,5,6,7,8,8*a*-octahydronaphthalen-1-yl)pent-2-enoate (**3**).**

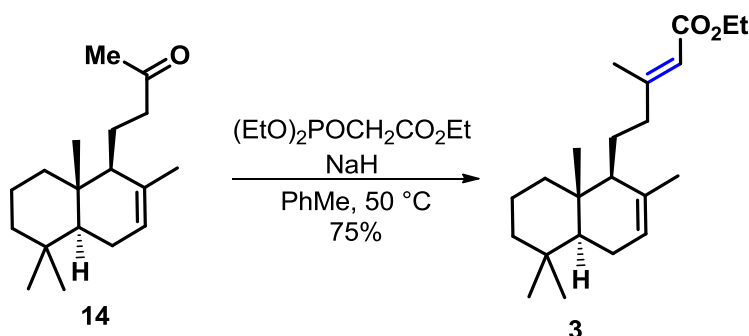

Triethyl phosphonoacetate (583  $\mu\text{L}$ , 2.85 mmol, 3 equiv) was added to a solution of ketone **14** (249 mg, 0.95 mmol, 1 equiv) in dry toluene (9.5 mL) at room temperature. Next, sodium hydride (60% w/w in mineral oil, 110 mg, 2.75 mmol, 2.9 equiv) was added to the mixture, which was then stirred for 10 min at room temperature and for 14 h at 50  $^\circ\text{C}$ . After cooling to room temperature, the reaction was quenched by the addition of brine (20 mL) and EtOAc (20 mL) was added to the mixture. The organic phase was separated, dried over anhydrous  $\text{MgSO}_4$  and concentrated under reduced pressure. The residue was subjected to flash chromatography ( $\text{SiO}_2$ , hexanes/EtOAc 97:3) to give the ester **3** (236 mg, 0.71 mmol) as a colorless oil in 75% yield.

**Note:** The minor (*Z*)-isomer was detected by GC/MS analysis of the crude (ca. 5.5% of the product) and was separated from the (*E*)-isomer during the chromatographic separation.

**TLC ( $\text{SiO}_2$ ):**  $R_f$  = 0.48 (hexanes/EtOAc 95:5);

$[\alpha]_D^{25}$  = +27 (*c* 1.0,  $\text{CHCl}_3$ );

**IR (ATR,  $\text{cm}^{-1}$ ):** 2923, 1716, 1648, 1457, 1386, 1221, 1143, 1040, 861;

**$^1\text{H}$  NMR** (250 MHz,  $\text{CDCl}_3$ ):  $\delta$  0.75 (s, 3H), 0.85 (s, 3H), 0.87 (s, 3H), 1.27 (t,  $J$  = 7.1 Hz, 3H), 1.69 (s, 3H), 0.79-1.74 (m, 9H), 2.16 (d,  $J$  = 1.3 Hz, 3H), 1.74-2.22 (m, 4H), 2.26-2.43 (m, 1H), 4.15 (q,  $J$  = 7.2 Hz, 2H), 5.40 (br. s, 1H), 5.66 (q,  $J$  = 1.0 Hz, 1H);

**$^{13}\text{C}$  NMR** (62.9 MHz,  $\text{CDCl}_3$ ):  $\delta$  13.5 ( $\text{CH}_3$ ), 14.3 ( $\text{CH}_3$ ), 18.7 ( $\text{CH}_2$ ), 18.9 ( $\text{CH}_3$ ), 21.8 ( $\text{CH}_3$ ), 22.1 ( $\text{CH}_3$ ), 23.8 ( $\text{CH}_2$ ), 25.3 ( $\text{CH}_2$ ), 32.9 (C), 33.1 ( $\text{CH}_3$ ), 36.8 (C), 39.1 ( $\text{CH}_2$ ), 42.2 ( $\text{CH}_2$ ), 43.4 ( $\text{CH}_2$ ), 50.1 (CH), 54.4 (CH), 59.4 ( $\text{CH}_2$ ), 115.5 (CH), 122.7 (CH), 134.7 (C), 160.3 (C), 166.8 (C);

**HRMS (ESI +):**  $m/z$  calculated for  $\text{C}_{22}\text{H}_{36}\text{O}_2\text{Na}^+$   $[\text{M}+\text{Na}]^+$  355.2608, found 355.2613.

|                        |                      |              |       |                      |                                                                  |                   |          |
|------------------------|----------------------|--------------|-------|----------------------|------------------------------------------------------------------|-------------------|----------|
| Acquisition Time (sec) | 3.1654               | Comment      | LN385 | Date                 | 14 Dec 2016 14:29:52                                             |                   |          |
| Date Stamp             | 14 Dec 2016 14:29:52 |              |       | File Name            | C:\Users\Luiz\Desktop\Luiz\PhD\NMR\dez16\dez14\ftH1\1\PDATA\1\1r |                   |          |
| Frequency (MHz)        | 250.13               | Nucleus      | 1H    | Number of Transients | 17                                                               | Origin            | spect    |
| Owner                  | root                 | Points Count | 32768 | Pulse Sequence       | zg30                                                             | Receiver Gain     | 256.00   |
| Solvent                | CHLOROFORM-d         |              |       | Spectrum Offset (Hz) | 1544.6561                                                        | Spectrum Type     | STANDARD |
| Temperature (degree C) | 25.160               |              |       |                      |                                                                  | SW(cyclical) (Hz) | 5175.98  |
|                        |                      |              |       |                      |                                                                  | Sweep Width (Hz)  | 5175.83  |

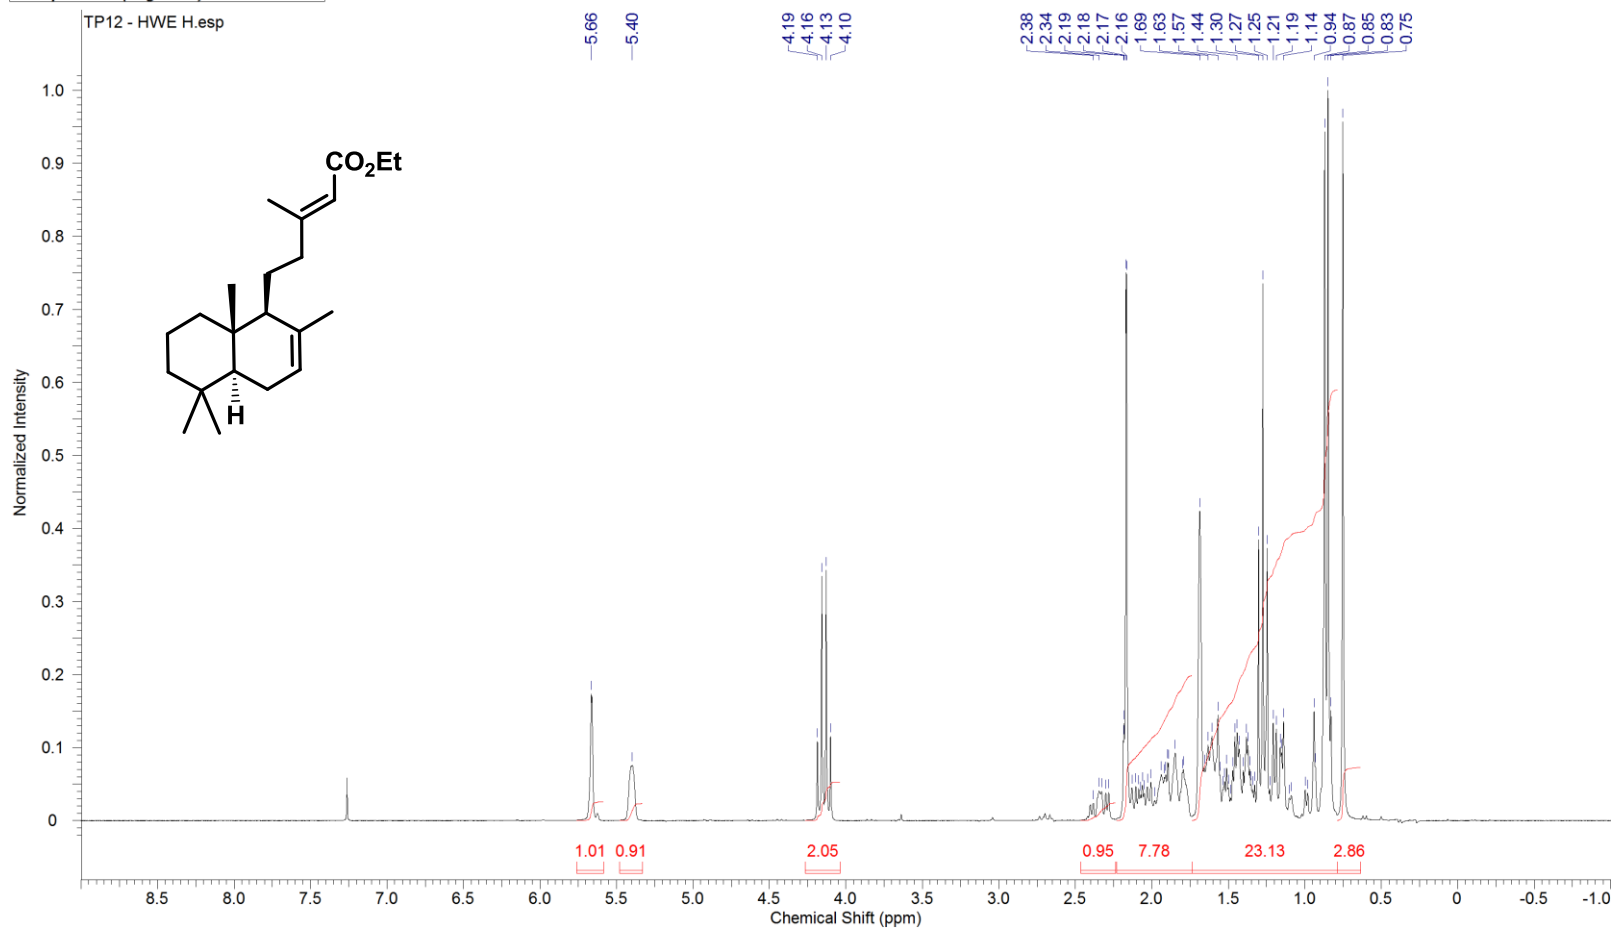

**Figure S32.** <sup>1</sup>H NMR spectrum (CDCl<sub>3</sub>, 250 MHz) of compound **3**.

|                        |                      |              |       |                      |                                                                  |                   |          |
|------------------------|----------------------|--------------|-------|----------------------|------------------------------------------------------------------|-------------------|----------|
| Acquisition Time (sec) | 1.0879               | Comment      | LN385 | Date                 | 14 Dec 2016 14:40:32                                             |                   |          |
| Date Stamp             | 14 Dec 2016 14:40:32 |              |       | File Name            | C:\Users\Luiz\Desktop\Luiz\PhD\NMR\dez16\dez14\ftH1\3\PDATA\1\1r |                   |          |
| Frequency (MHz)        | 62.90                | Nucleus      | 13C   | Number of Transients | 121                                                              | Origin            | spect    |
| Owner                  | root                 | Points Count | 32768 | Pulse Sequence       | zgpg30                                                           | Receiver Gain     | 456.10   |
| Solvent                | CHLOROFORM-d         |              |       | Spectrum Offset (Hz) | 6289.0518                                                        | Spectrum Type     | STANDARD |
| Temperature (degree C) | 25.160               |              |       |                      |                                                                  | SW(cyclical) (Hz) | 15060.24 |
|                        |                      |              |       |                      |                                                                  | Sweep Width (Hz)  | 15059.78 |

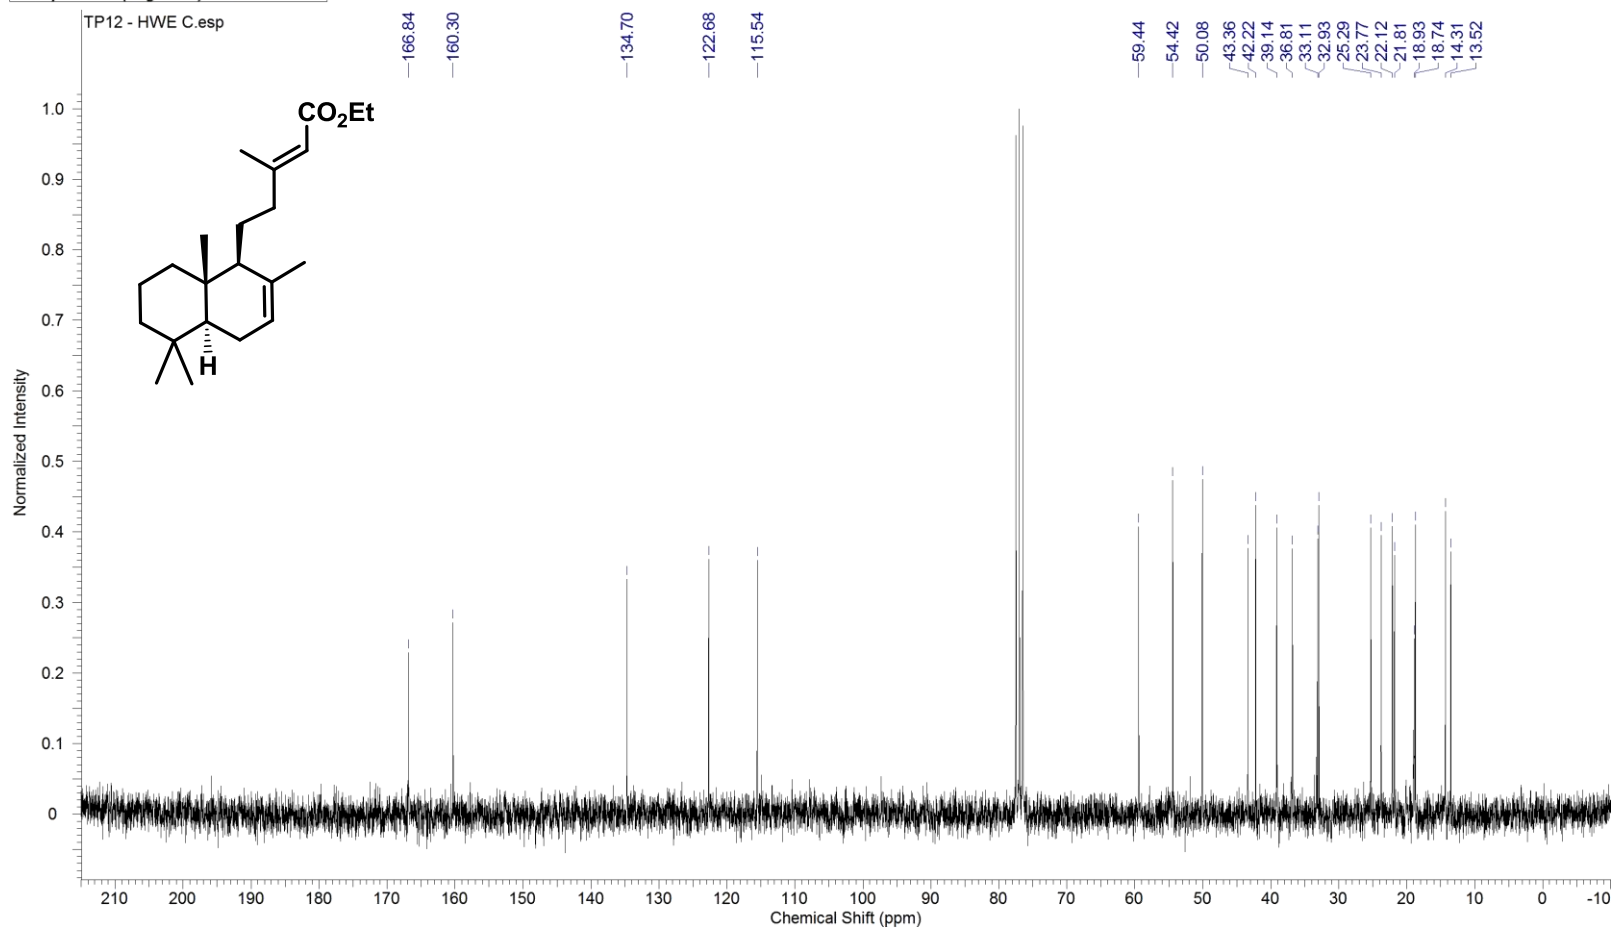

**Figure S33.**  $^{13}\text{C}$  NMR spectrum ( $\text{CDCl}_3$ , 62.9 MHz) of compound **3**.

|                        |                      |              |                 |                      |                                                                  |                   |          |
|------------------------|----------------------|--------------|-----------------|----------------------|------------------------------------------------------------------|-------------------|----------|
| Acquisition Time (sec) | 0.5439               | Comment      | LN385           | Date                 | 14 Dec 2016 14:34:08                                             |                   |          |
| Date Stamp             | 14 Dec 2016 14:34:08 |              |                 | File Name            | C:\Users\Luiz\Desktop\Luiz\PhD\NMR\dez16\dez14\ftH1\2\PDATA\1\1r |                   |          |
| Frequency (MHz)        | 62.90                | Nucleus      | <sup>13</sup> C | Number of Transients | 104                                                              | Origin            | spect    |
| Owner                  | root                 | Points Count | 32768           | Pulse Sequence       | dept135                                                          | Receiver Gain     | 912.30   |
| Solvent                | CHLOROFORM-d         |              |                 | Spectrum Offset (Hz) | 6289.0518                                                        | Spectrum Type     | DEPT135  |
| Temperature (degree C) | 25.160               |              |                 |                      |                                                                  | SW(cyclical) (Hz) | 15060.24 |
|                        |                      |              |                 |                      |                                                                  | Sweep Width (Hz)  | 15059.78 |

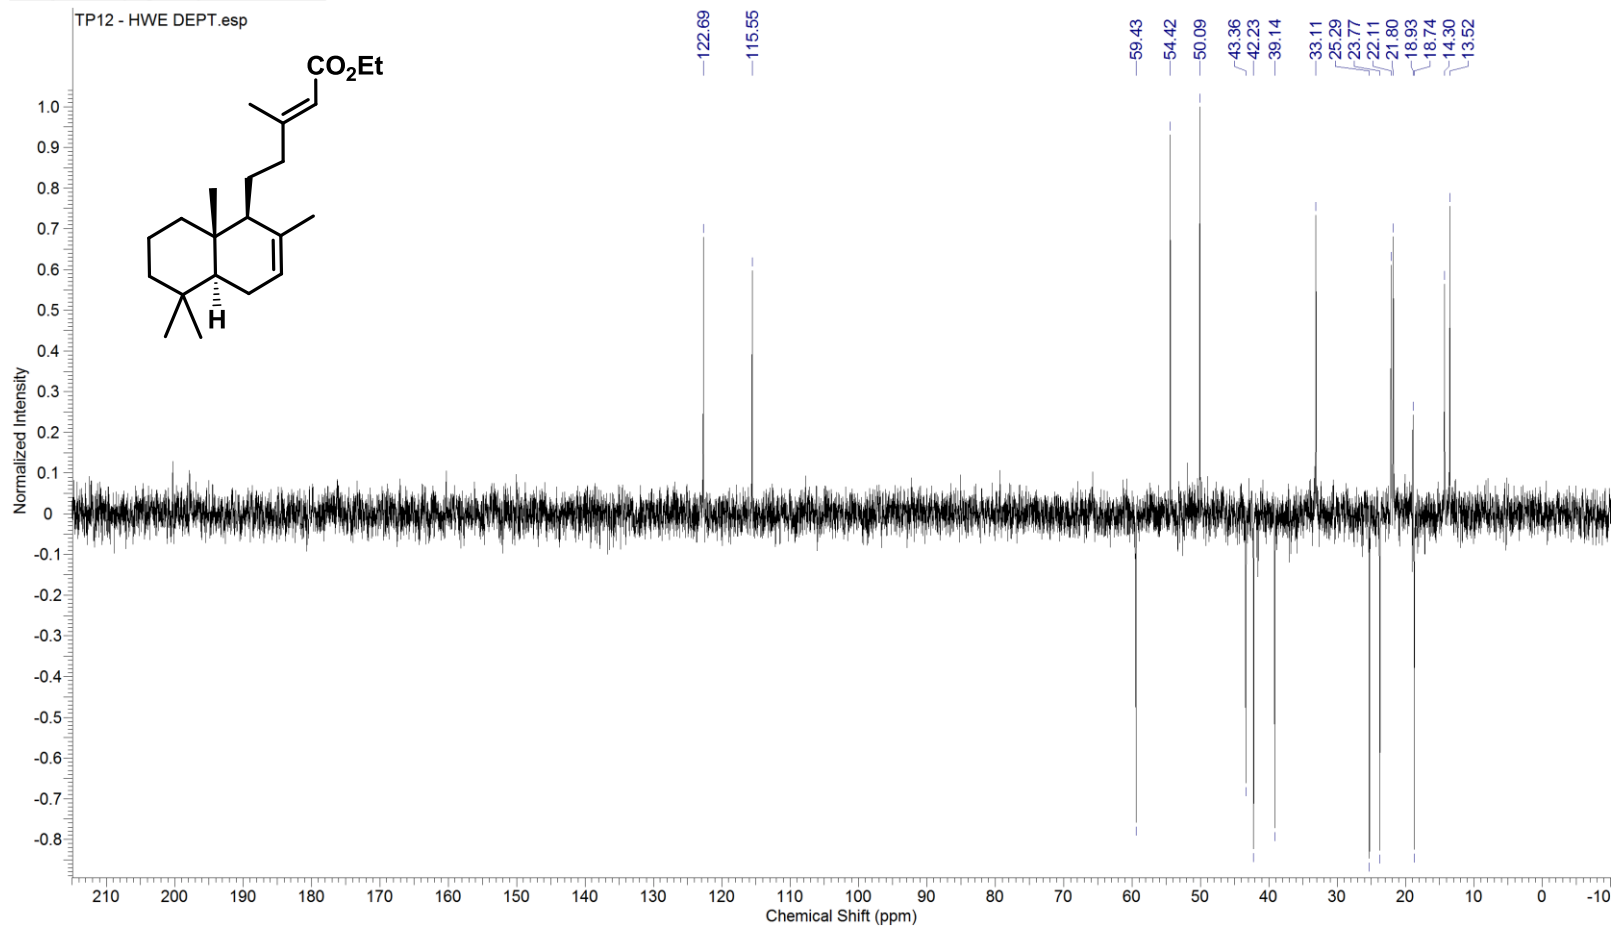

**Figure S34.** DEPT 135 NMR spectrum ( $\text{CDCl}_3$ , 62.9 MHz) of compound **3**.

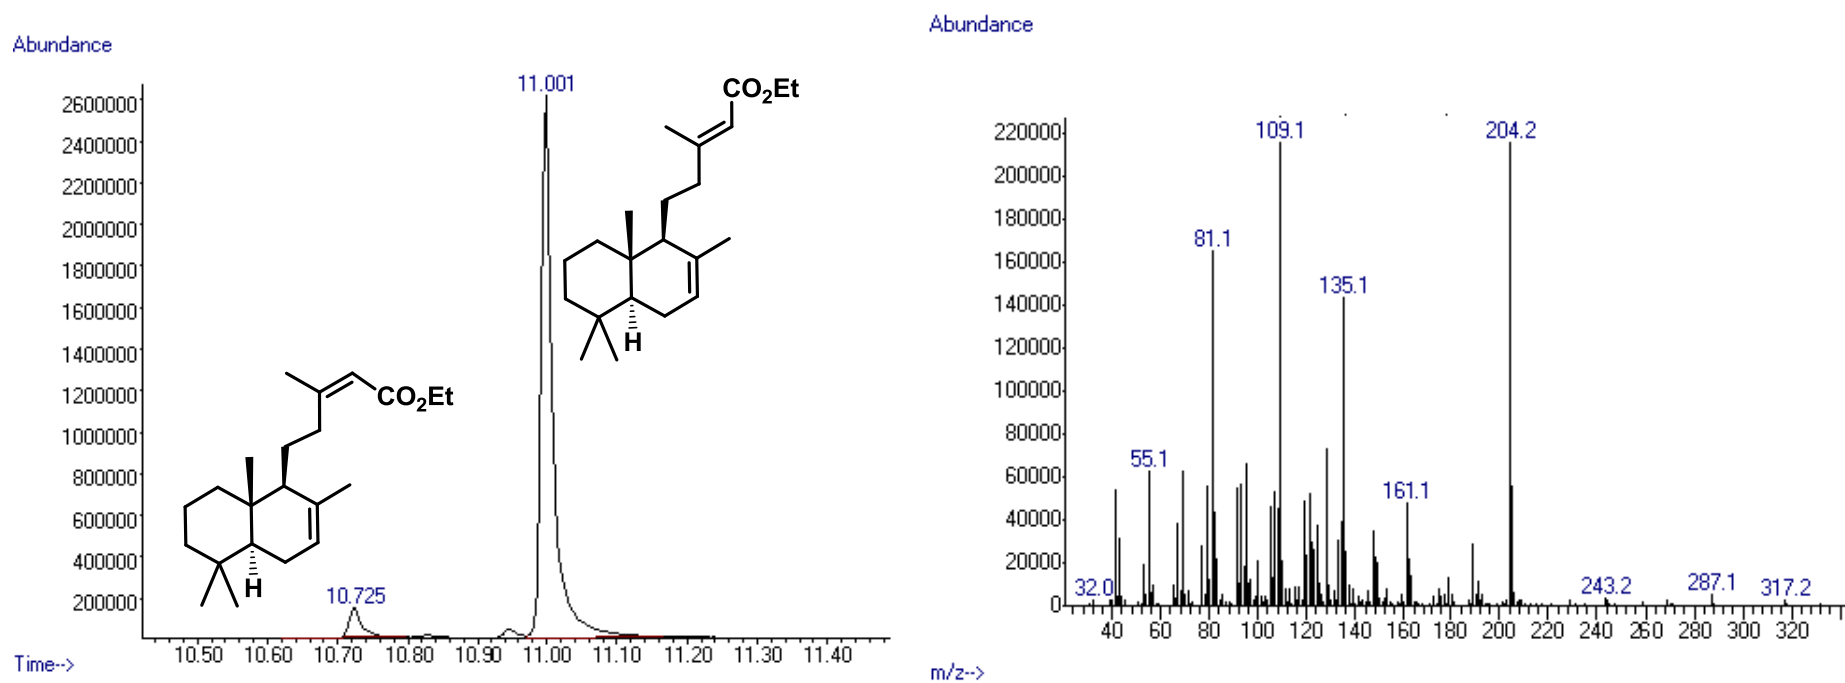

$t_R$  (Z-isomer) = 10.725 min,  $[M-CH_3]^+ = 317.2$ , area: 5.5%

$t_R$  (E-isomer) = 11.001 min,  $[M-CH_3]^+ = 317.2$ , area: 94.5%

**Figure S35.** GC/MS analysis of compound **3** before the chromatographic separation.

**(*E*)-3-methyl-5-((1*S*,4*aS*,8*aS*)-2,5,5,8*a*-tetramethyl-1,4,4*a*,5,6,7,8,8*a*-octahydronaphthalen-1-yl)pent-2-enoic acid (**17**).**

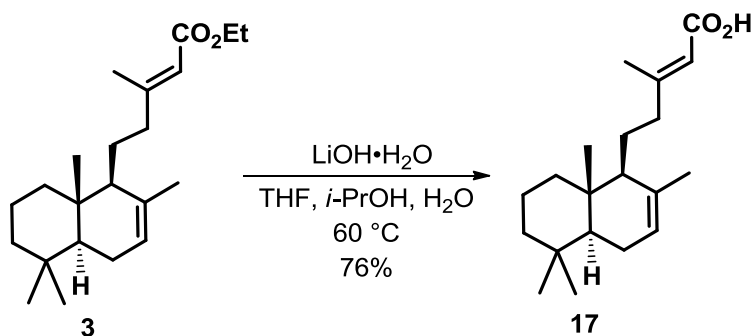

Solid LiOH·H<sub>2</sub>O (298 mg, 12.2 mmol, 20 equiv) was added to a solution of ester **3** (203 mg, 0.610 mmol, 1 equiv) in a mixture of THF, *i*-PrOH and H<sub>2</sub>O (21 mL, 1:1:1). The reaction was stirred at 60 °C for 20 h, then the volatiles were removed under reduced pressure. To the remaining residue, EtOAc (30 mL) and HCl solution (1 M, 30 mL) were added. The organic phase was separated, washed with brine (20 mL), dried over anhydrous MgSO<sub>4</sub> and concentrated under reduced pressure. The residue was subjected to flash chromatography (SiO<sub>2</sub>, hexanes/EtOAc 85:15) to give the carboxylic acid **17** (141 mg, 0.463 mmol) as a white solid in 76% yield.

**TLC (SiO<sub>2</sub>):** R<sub>f</sub> = 0.46 (hexanes/EtOAc 75:25);

[α]<sub>D</sub><sup>25</sup> = +34 (*c* 1.0, CHCl<sub>3</sub>);

**IR (ATR, cm<sup>-1</sup>):** 3441 (broad), 2946 (broad), 2924, 2849, 1693, 1639, 1437, 1257, 1173, 867;

**<sup>1</sup>H NMR** (250 MHz, CDCl<sub>3</sub>): δ 0.76 (s, 3H), 0.86 (s, 3H), 0.88 (s, 3H), 0.80-1.03 (m, 2H), 1.08-1.73 (m, 7H), 1.70 (s, 3H), 2.19 (d, *J* = 1.1 Hz, 3H), 1.75-2.25 (m, 4H), 2.30-2.46 (m, 1H), 5.41 (br. s, 1H), 5.70 (q, *J* = 0.8 Hz, 1H), 11.46 (br. s, 1H);

**<sup>13</sup>C NMR** (62.9 MHz, CDCl<sub>3</sub>): δ 13.5 (CH<sub>3</sub>), 18.7 (CH<sub>2</sub>), 19.3 (CH<sub>3</sub>), 21.8 (CH<sub>3</sub>), 22.1 (CH<sub>3</sub>), 23.8 (CH<sub>2</sub>), 25.3 (CH<sub>2</sub>), 32.9 (C), 33.1 (CH<sub>3</sub>), 36.8 (C), 39.2 (CH<sub>2</sub>), 42.2 (CH<sub>2</sub>), 43.6 (CH<sub>2</sub>), 50.1 (CH), 54.4 (CH), 115.1 (CH), 122.8 (CH), 134.6 (C), 163.6 (C), 172.2 (C);

**HRMS (ESI +):** *m/z* calculated for C<sub>20</sub>H<sub>32</sub>O<sub>2</sub>Na<sup>+</sup> [M+Na]<sup>+</sup> 327.2295, found 327.2286.

|                        |                      |              |       |                      |                                                                     |                   |          |
|------------------------|----------------------|--------------|-------|----------------------|---------------------------------------------------------------------|-------------------|----------|
| Acquisition Time (sec) | 3.1654               | Comment      | LN504 | Date                 | 29 Mar 2017 16:50:24                                                |                   |          |
| Date Stamp             | 29 Mar 2017 16:50:24 |              |       | File Name            | C:\Users\Luiz\Desktop\Luiz\PhD\NMR\17-3-mar\mar29\ftH4\1\PDATA\1\1r |                   |          |
| Frequency (MHz)        | 250.13               | Nucleus      | 1H    | Number of Transients | 9                                                                   | Origin            | spect    |
| Owner                  | root                 | Points Count | 32768 | Pulse Sequence       | zg30                                                                | Receiver Gain     | 322.50   |
| Solvent                | CHLOROFORM-d         |              |       | Spectrum Offset (Hz) | 1544.6561                                                           | Spectrum Type     | STANDARD |
| Temperature (degree C) | 25.160               |              |       |                      |                                                                     | SW(cyclical) (Hz) | 5175.98  |
|                        |                      |              |       |                      |                                                                     | Sweep Width (Hz)  | 5175.83  |

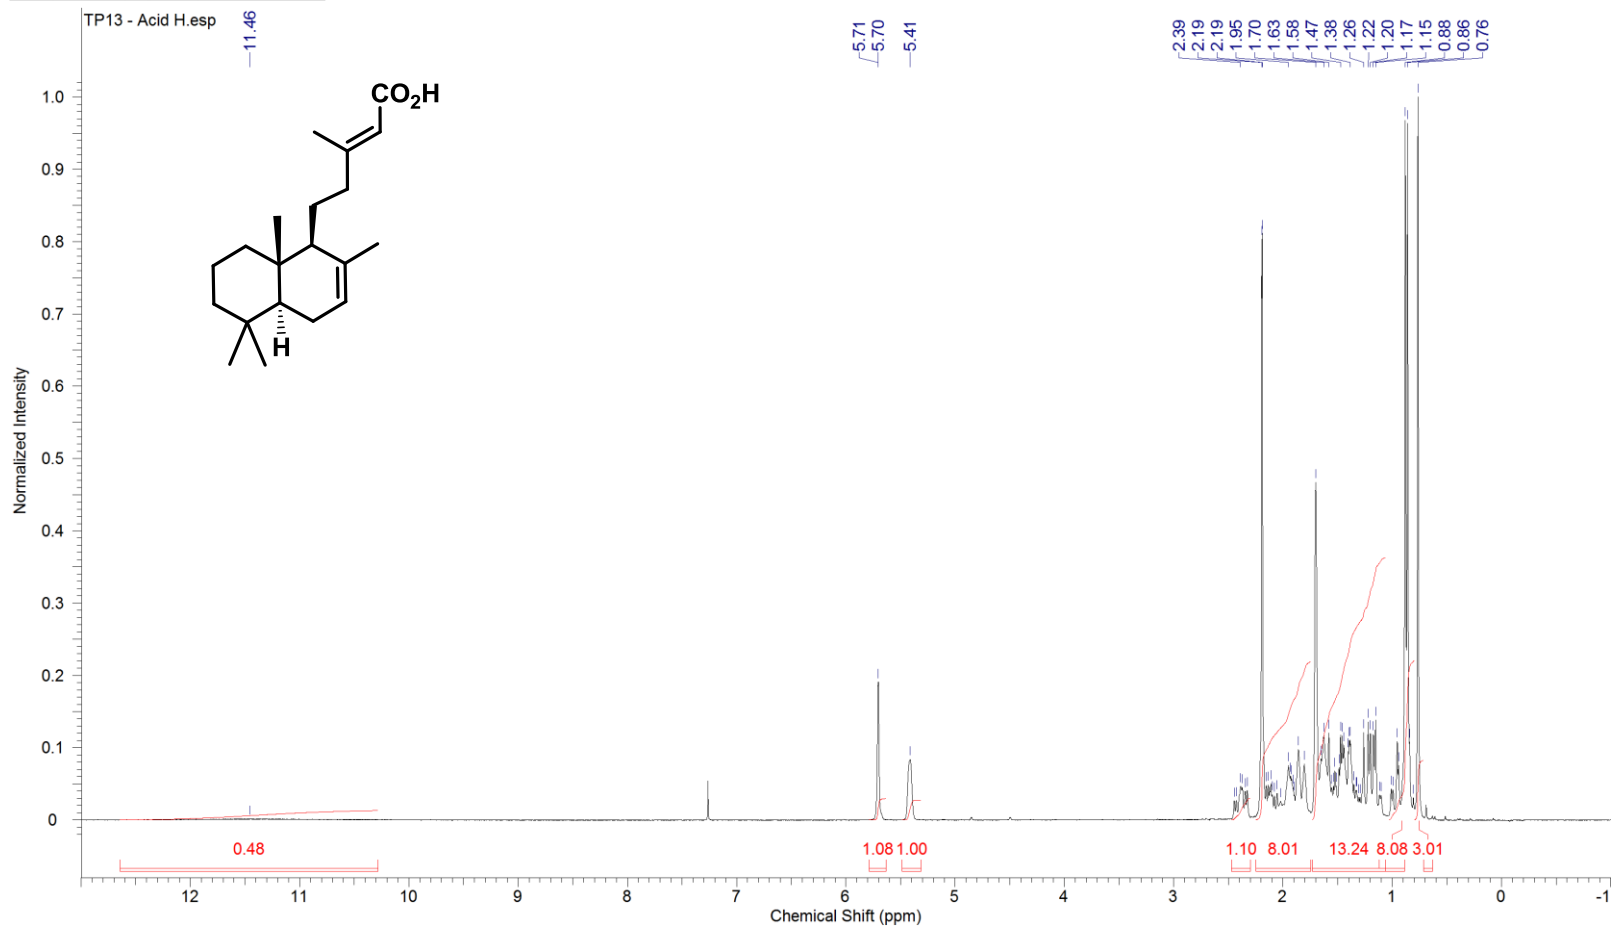

**Figure S36.** <sup>1</sup>H NMR spectrum (CDCl<sub>3</sub>, 250 MHz) of compound **17**.



|                        |                      |              |                 |                      |                                                                     |                   |          |
|------------------------|----------------------|--------------|-----------------|----------------------|---------------------------------------------------------------------|-------------------|----------|
| Acquisition Time (sec) | 1.0879               | Comment      | LN504           | Date                 | 29 Mar 2017 16:54:40                                                |                   |          |
| Date Stamp             | 29 Mar 2017 16:54:40 |              |                 | File Name            | C:\Users\Luiz\Desktop\Luiz\PhD\NMR\17-3-mar\mar29\ftH4\2\PDATA\1\1r |                   |          |
| Frequency (MHz)        | 62.90                | Nucleus      | <sup>13</sup> C | Number of Transients | 100                                                                 | Origin            | spect    |
| Owner                  | root                 | Points Count | 32768           | Pulse Sequence       | zgpg30                                                              | Receiver Gain     | 912.30   |
| Solvent                | CHLOROFORM-d         |              |                 | Spectrum Offset (Hz) | 6289.0518                                                           | Spectrum Type     | STANDARD |
| Temperature (degree C) | 25.160               |              |                 |                      |                                                                     | SW(cyclical) (Hz) | 15060.24 |
|                        |                      |              |                 |                      |                                                                     | Sweep Width (Hz)  | 15059.78 |

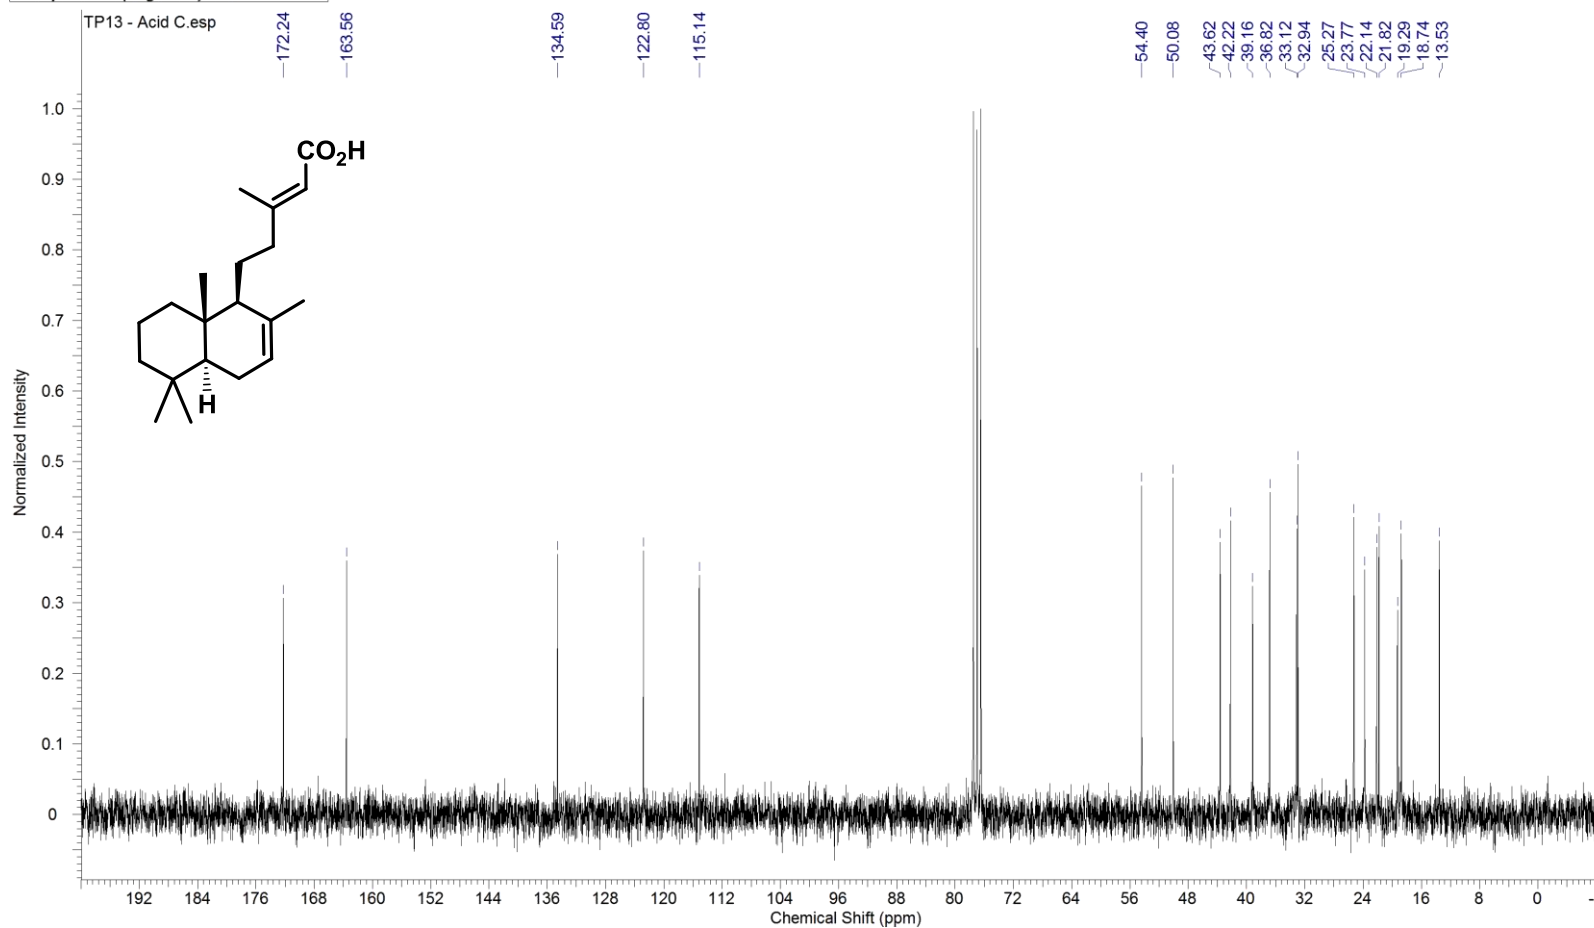

**Figure S37.** <sup>13</sup>C NMR spectrum (CDCl<sub>3</sub>, 62.9 MHz) of compound **17**.

|                        |                      |              |       |                      |                                                                      |                   |          |
|------------------------|----------------------|--------------|-------|----------------------|----------------------------------------------------------------------|-------------------|----------|
| Acquisition Time (sec) | 0.5439               | Comment      | LN386 | Date                 | 19 Dec 2016 12:30:24                                                 |                   |          |
| Date Stamp             | 19 Dec 2016 12:30:24 |              |       | File Name            | C:\Users\Luiz\Desktop\Luiz\PhD\NMR\16-12-dez\dez19\ftH1\2\PDATA\1\1r |                   |          |
| Frequency (MHz)        | 62.90                | Nucleus      | 13C   | Number of Transients | 137                                                                  | Origin            | spect    |
| Owner                  | root                 | Points Count | 32768 | Pulse Sequence       | dept135                                                              | Receiver Gain     | 16384.00 |
| Solvent                | CHLOROFORM-d         |              |       | Spectrum Offset (Hz) | 6289.0518                                                            | Spectrum Type     | DEPT135  |
| Temperature (degree C) | 22.460               |              |       |                      |                                                                      | SW(cyclical) (Hz) | 15060.24 |
|                        |                      |              |       |                      |                                                                      | Sweep Width (Hz)  | 15059.78 |

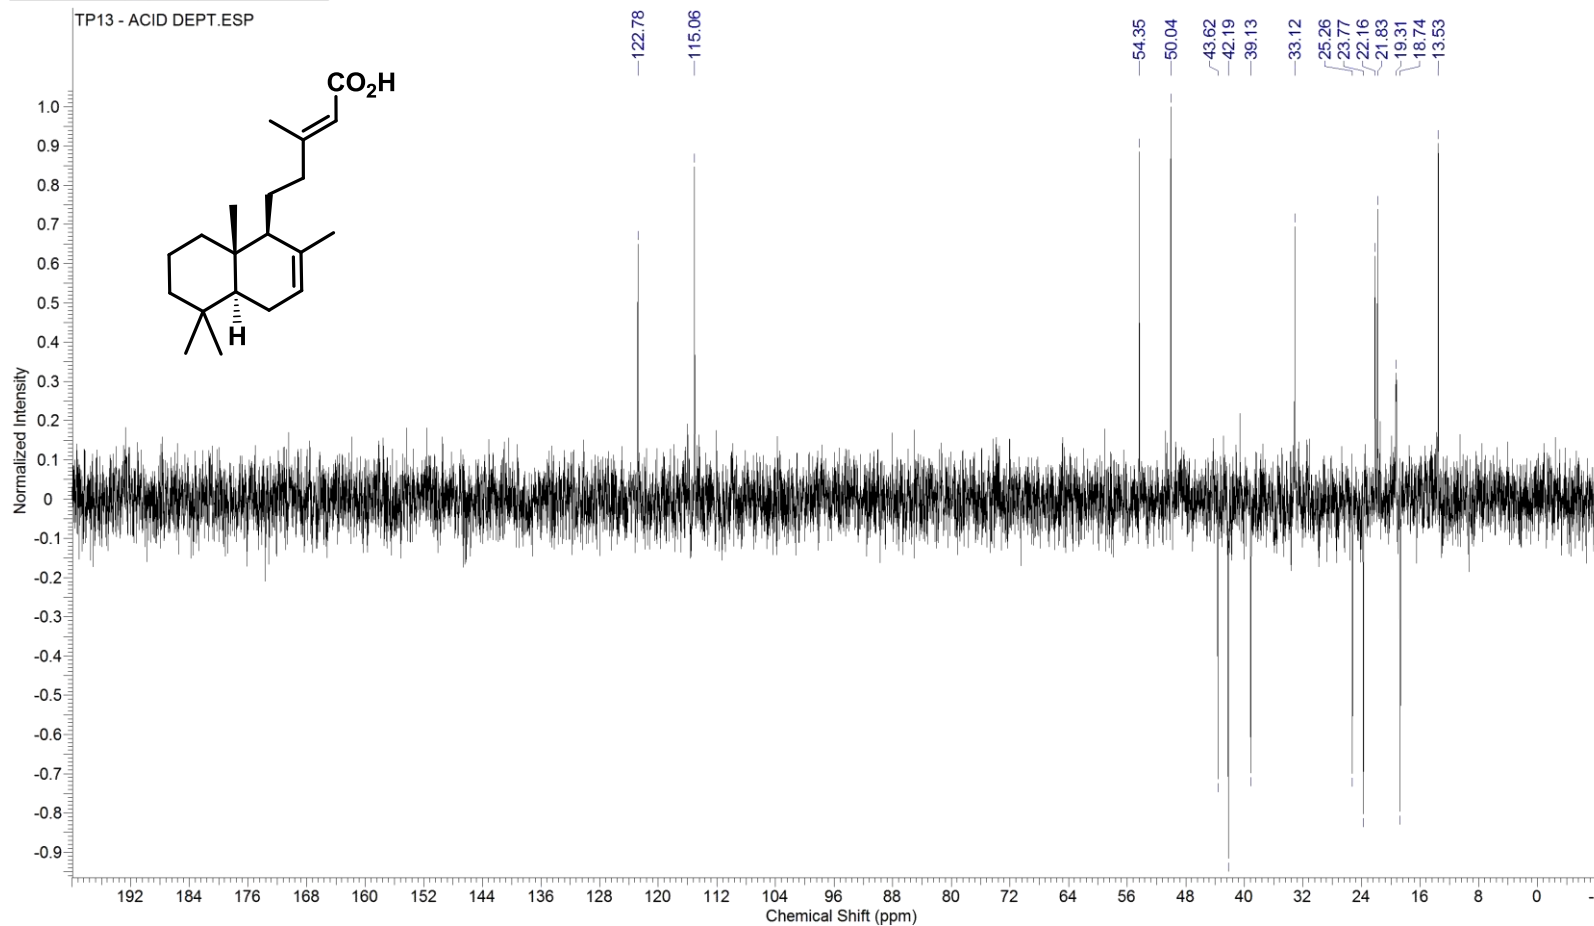

**Figure S38.** DEPT 135 NMR spectrum (CDCl<sub>3</sub>, 62.9 MHz) of compound **17**.

(4a*S*,5*S*,8a*S*)-5-((*E*)-4-iodo-3-methylbut-3-en-1-yl)-1,1,4a,6-tetramethyl-1,2,3,4,4a,5,8,8a-octahydronaphthalene (**2**).

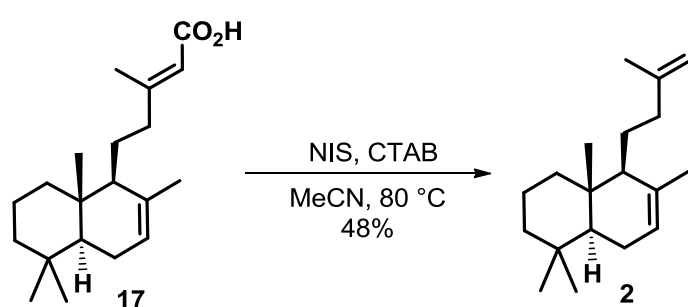

A flask was charged with carboxylic acid **17** (93.2 mg, 0.306 mmol, 1 equiv) and CTAB (113 mg, 0.306 mmol, 1 equiv), the flask was purged with nitrogen, and dry acetonitrile (7 mL) was added followed by NIS (138 mg, 0.612 mmol, 2 equiv). The reaction mixture was heated at 80 °C for 1 h and, after cooling to room temperature, solvent was partially removed under reduced pressure to ~1 mL of crude reaction mixture. This residue was subjected to flash chromatography (SiO<sub>2</sub>, hexanes) to give the iodide **2** (56.5 mg, 0.146 mmol) as a colorless oil in 48% yield.

**TLC (SiO<sub>2</sub>):** R<sub>f</sub> = 0.90 (hexanes);

[ $\alpha$ ]<sub>D</sub><sup>25</sup> = +35 (*c* 1.0, CHCl<sub>3</sub>), [ $\alpha$ ]<sub>D,lit</sub><sup>20</sup> = +33 (*c* 0.8, CHCl<sub>3</sub>);<sup>5</sup>

**<sup>1</sup>H NMR** (250 MHz, CDCl<sub>3</sub>):  $\delta$  0.75 (s, 3H), 0.86 (s, 3H), 0.88 (s, 3H), 0.80-1.02 (m, 2H) 1.07-1.64 (m, 10H), 1.68 (s, 3H), 1.85 (d, *J* = 0.8 Hz, 3H), 1.75-2.06 (m, 3H), 2.16 (ddd, *J* = 14.1, 10.3, 6.3 Hz, 1H), 2.40 (ddd, *J* = 14.4, 11.4, 4.6 Hz, 1H), 5.40 (br. s, 1H), 5.90 (q, *J* = 0.8 Hz, 1H);

**<sup>13</sup>C NMR** (62.9 MHz, CDCl<sub>3</sub>):  $\delta$  13.6 (CH<sub>3</sub>), 18.8 (CH<sub>2</sub>), 21.8 (CH<sub>3</sub>), 22.2 (CH<sub>3</sub>), 23.8 (CH<sub>2</sub>), 24.0 (CH<sub>3</sub>), 25.6 (CH<sub>3</sub>), 32.9 (C), 33.1 (CH<sub>3</sub>), 36.8 (C), 39.2 (CH<sub>2</sub>), 42.0 (CH<sub>2</sub>), 42.3 (CH<sub>2</sub>), 50.1 (CH), 54.3 (CH), 74.9 (CH), 122.6 (CH), 134.8 (C), 148.5 (C).

<sup>5</sup> Guo, Y.-a.; Zhao, M.; Xu, Z.; Ye, T. *Chem. Eur. J.* **2017**, *23*, 3572-3576.

|                        |                      |              |       |                      |                                                                     |                   |          |
|------------------------|----------------------|--------------|-------|----------------------|---------------------------------------------------------------------|-------------------|----------|
| Acquisition Time (sec) | 3.1654               | Comment      | LN513 | Date                 | 01 Apr 2017 17:11:44                                                |                   |          |
| Date Stamp             | 01 Apr 2017 17:11:44 |              |       | File Name            | C:\Users\Luiz\Desktop\Luiz\PhD\NMR\17-4-abr\abr01\ftH2\1\PDATA\1\1r |                   |          |
| Frequency (MHz)        | 250.13               | Nucleus      | 1H    | Number of Transients | 17                                                                  | Origin            | spect    |
| Owner                  | root                 | Points Count | 32768 | Pulse Sequence       | zg30                                                                | Receiver Gain     | 287.40   |
| Solvent                | CHLOROFORM-d         |              |       | Spectrum Offset (Hz) | 1544.6561                                                           | Spectrum Type     | STANDARD |
| Temperature (degree C) | 25.160               |              |       |                      |                                                                     | SW(cyclical) (Hz) | 5175.98  |
|                        |                      |              |       |                      |                                                                     | Sweep Width (Hz)  | 5175.83  |

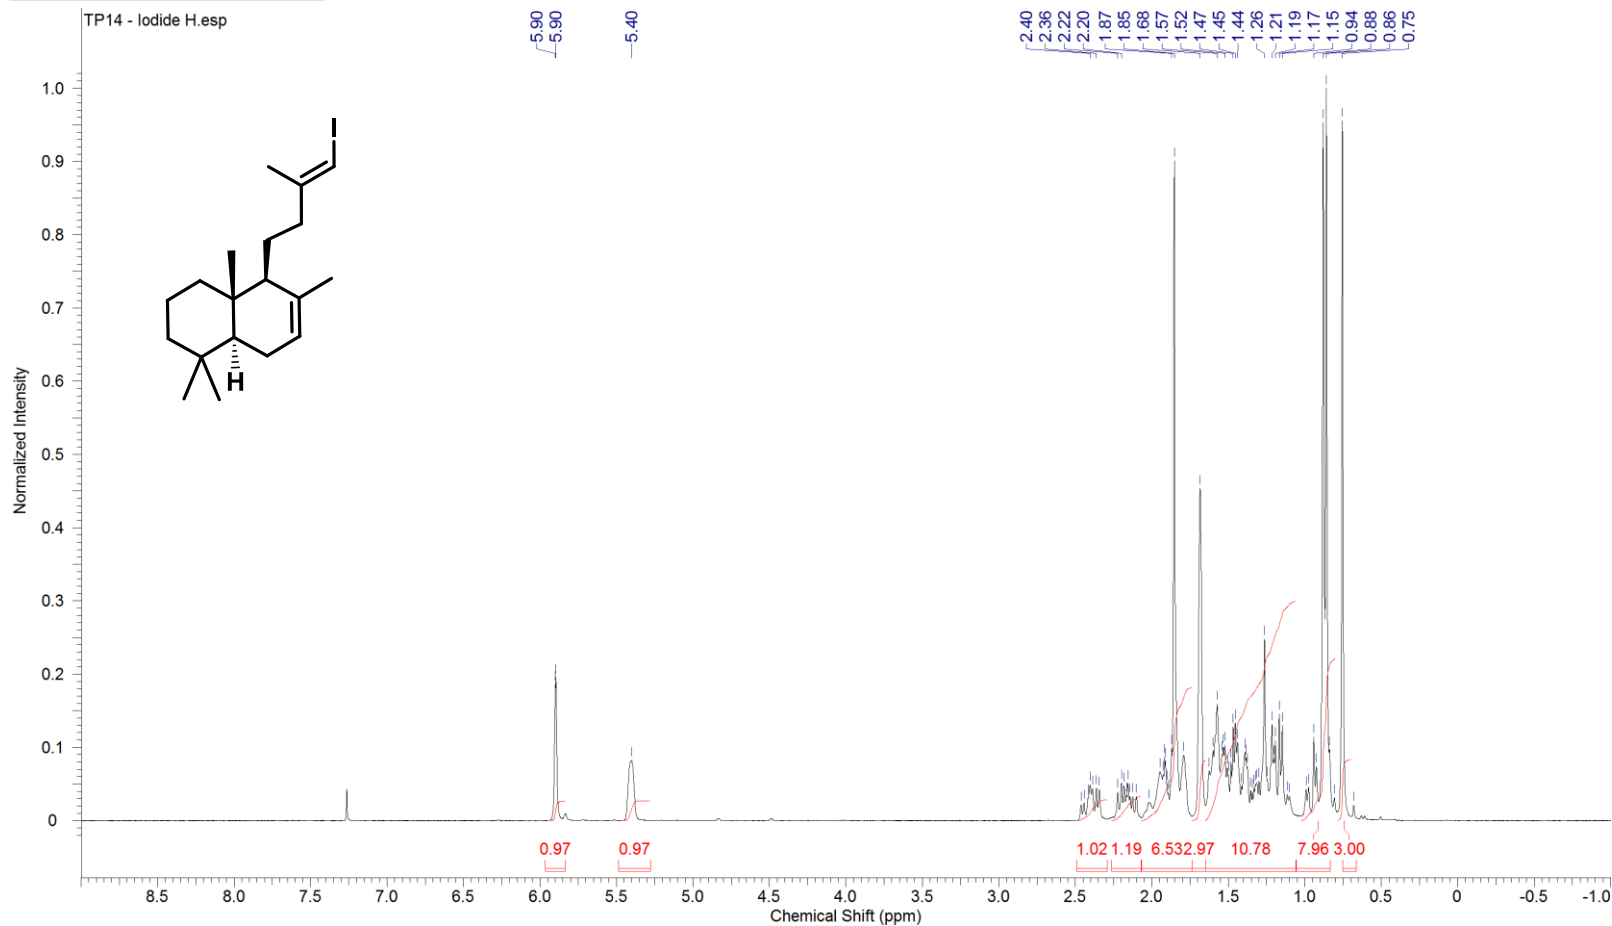

**Figure S39.**  $^1\text{H}$  NMR spectrum ( $\text{CDCl}_3$ , 250 MHz) of compound **2**.

|                        |                      |              |       |                      |                                                                      |                   |          |
|------------------------|----------------------|--------------|-------|----------------------|----------------------------------------------------------------------|-------------------|----------|
| Acquisition Time (sec) | 1.0879               | Comment      | LN513 | Date                 | 01 Apr 2017 17:20:16                                                 |                   |          |
| Date Stamp             | 01 Apr 2017 17:20:16 |              |       | File Name            | C:\Users\Luiz\Desktop\Luiz\PhD\NMR\17-4-abr\abr01\ftH2\3\IPDATA\1\1r |                   |          |
| Frequency (MHz)        | 62.90                | Nucleus      | 13C   | Number of Transients | 64                                                                   | Origin            | spect    |
| Owner                  | root                 | Points Count | 32768 | Pulse Sequence       | zgpg30                                                               | Receiver Gain     | 1824.60  |
| Solvent                | CHLOROFORM-d         |              |       | Spectrum Offset (Hz) | 6289.0518                                                            | Spectrum Type     | STANDARD |
| Temperature (degree C) | 25.160               |              |       |                      |                                                                      | SW(cyclical) (Hz) | 15060.24 |
|                        |                      |              |       |                      |                                                                      | Sweep Width (Hz)  | 15059.78 |

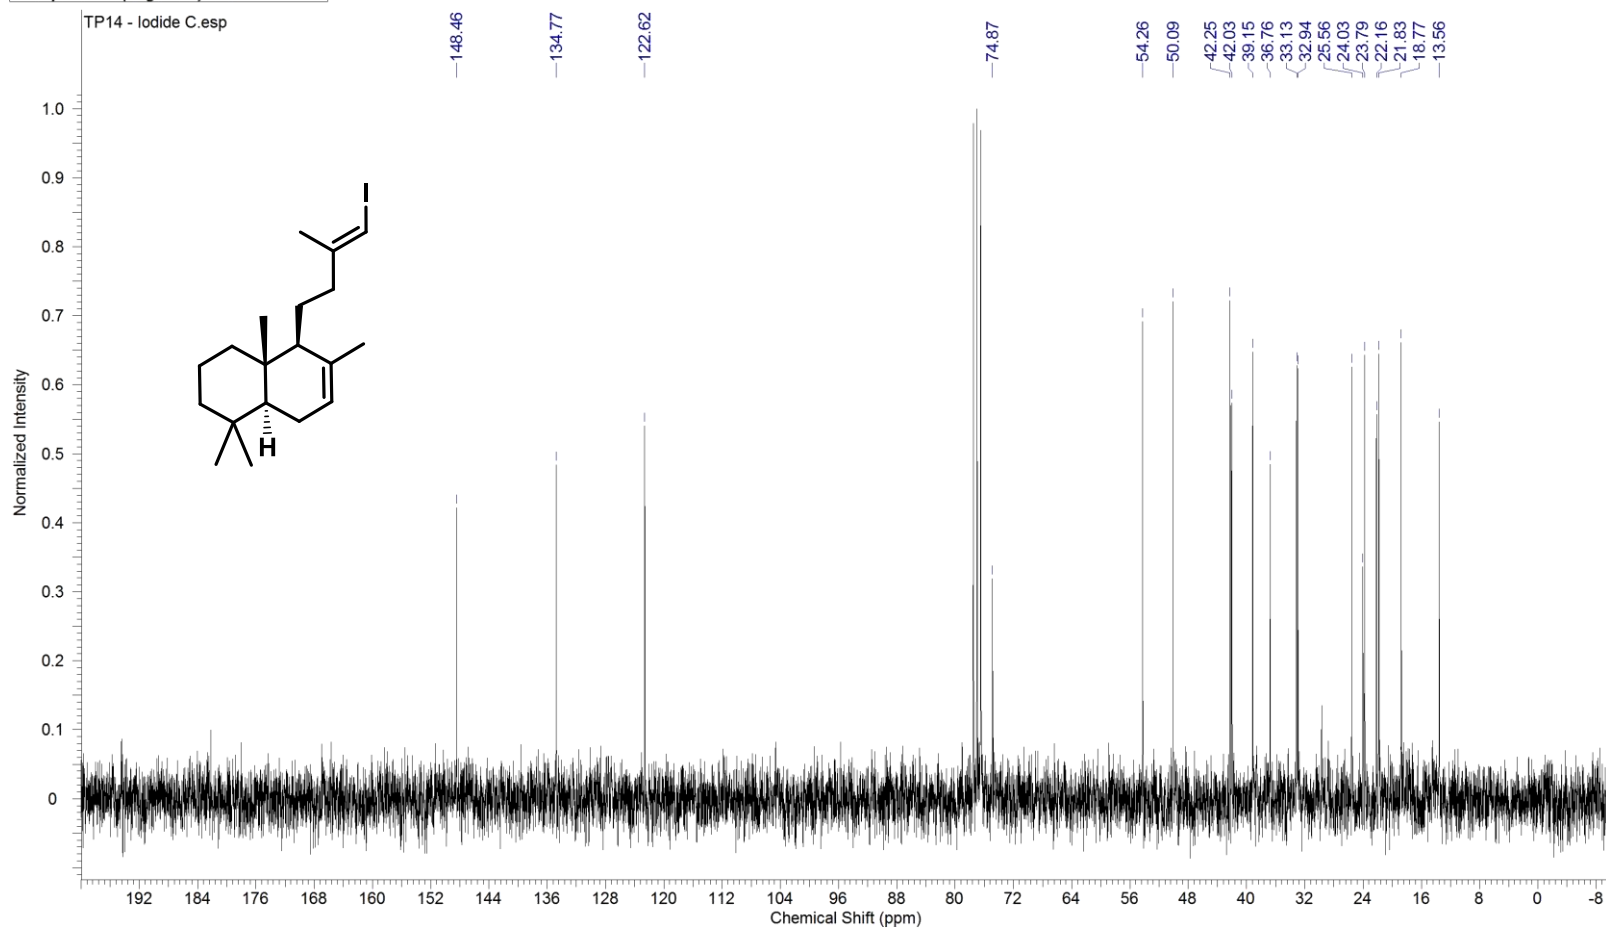

**Figure S40.**  $^{13}\text{C}$  NMR spectrum ( $\text{CDCl}_3$ , 62.9 MHz) of compound **2**.

|                        |                      |              |       |                      |                                                                     |                   |          |
|------------------------|----------------------|--------------|-------|----------------------|---------------------------------------------------------------------|-------------------|----------|
| Acquisition Time (sec) | 0.5439               | Comment      | LN513 | Date                 | 01 Apr 2017 17:13:52                                                |                   |          |
| Date Stamp             | 01 Apr 2017 17:13:52 |              |       | File Name            | C:\Users\Luiz\Desktop\Luiz\PhD\NMR\17-4-abr\abr01\ftH2\2\PDATA\1\1r |                   |          |
| Frequency (MHz)        | 62.90                | Nucleus      | 13C   | Number of Transients | 100                                                                 | Origin            | spect    |
| Owner                  | root                 | Points Count | 32768 | Pulse Sequence       | dept135                                                             | Receiver Gain     | 1625.50  |
| Solvent                | CHLOROFORM-d         |              |       | Spectrum Offset (Hz) | 6289.0518                                                           | Spectrum Type     | DEPT135  |
| Temperature (degree C) | 25.160               |              |       |                      |                                                                     | SW(cyclical) (Hz) | 15060.24 |
|                        |                      |              |       |                      |                                                                     | Sweep Width (Hz)  | 15059.78 |

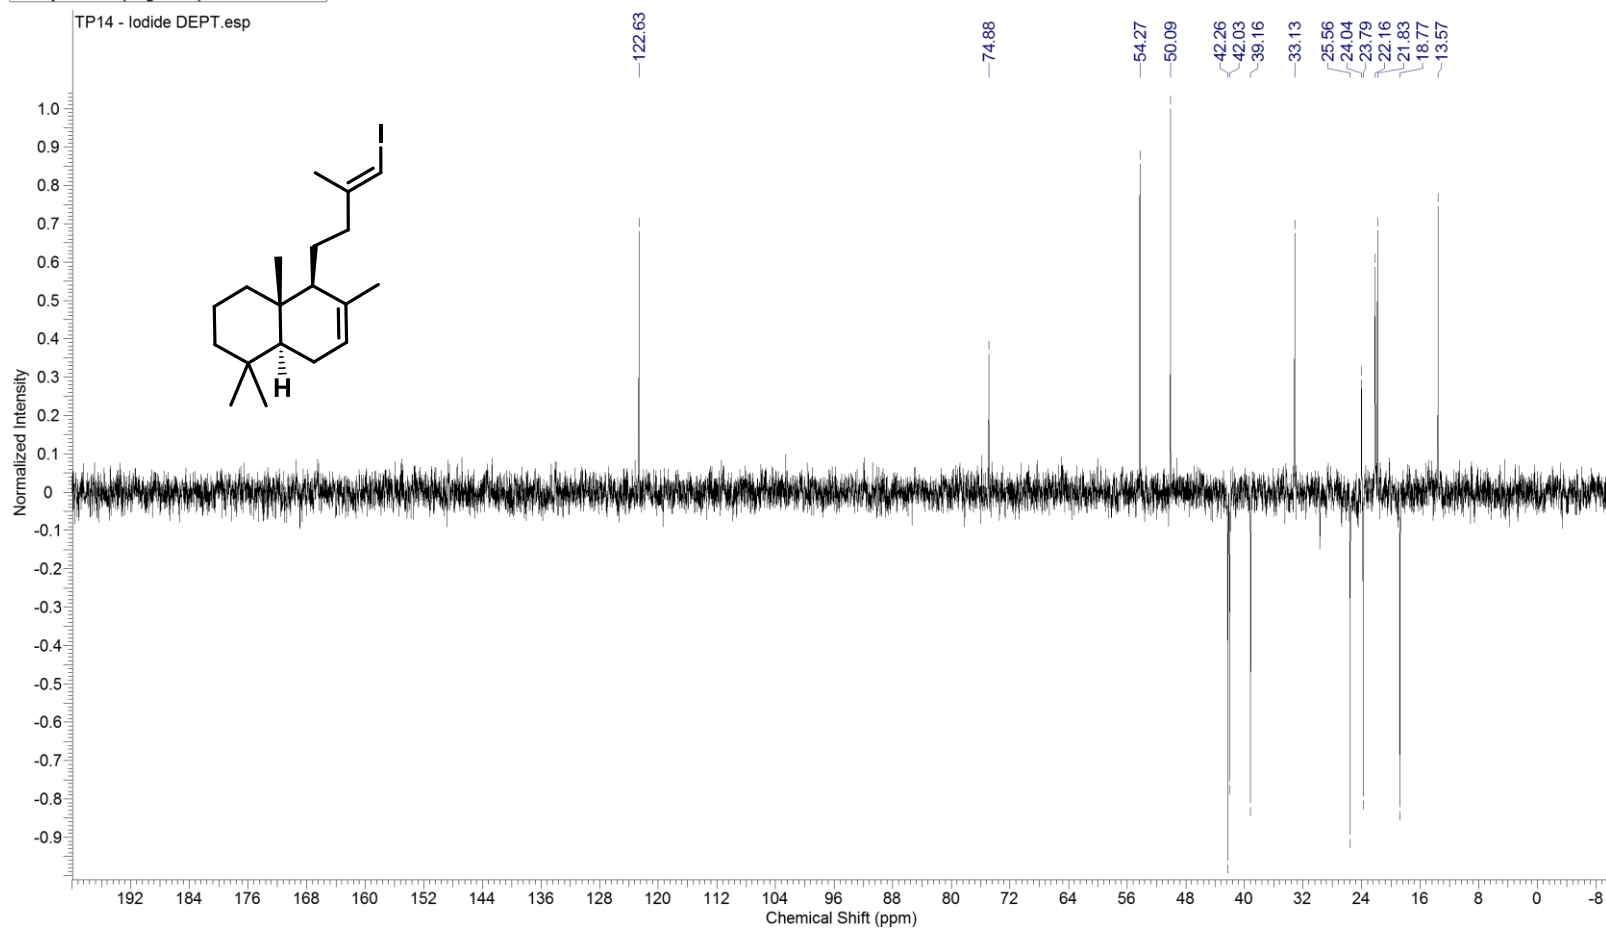

**Figure S41.** DEPT 135 NMR spectrum ( $\text{CDCl}_3$ , 62.9 MHz) of compound **2**.

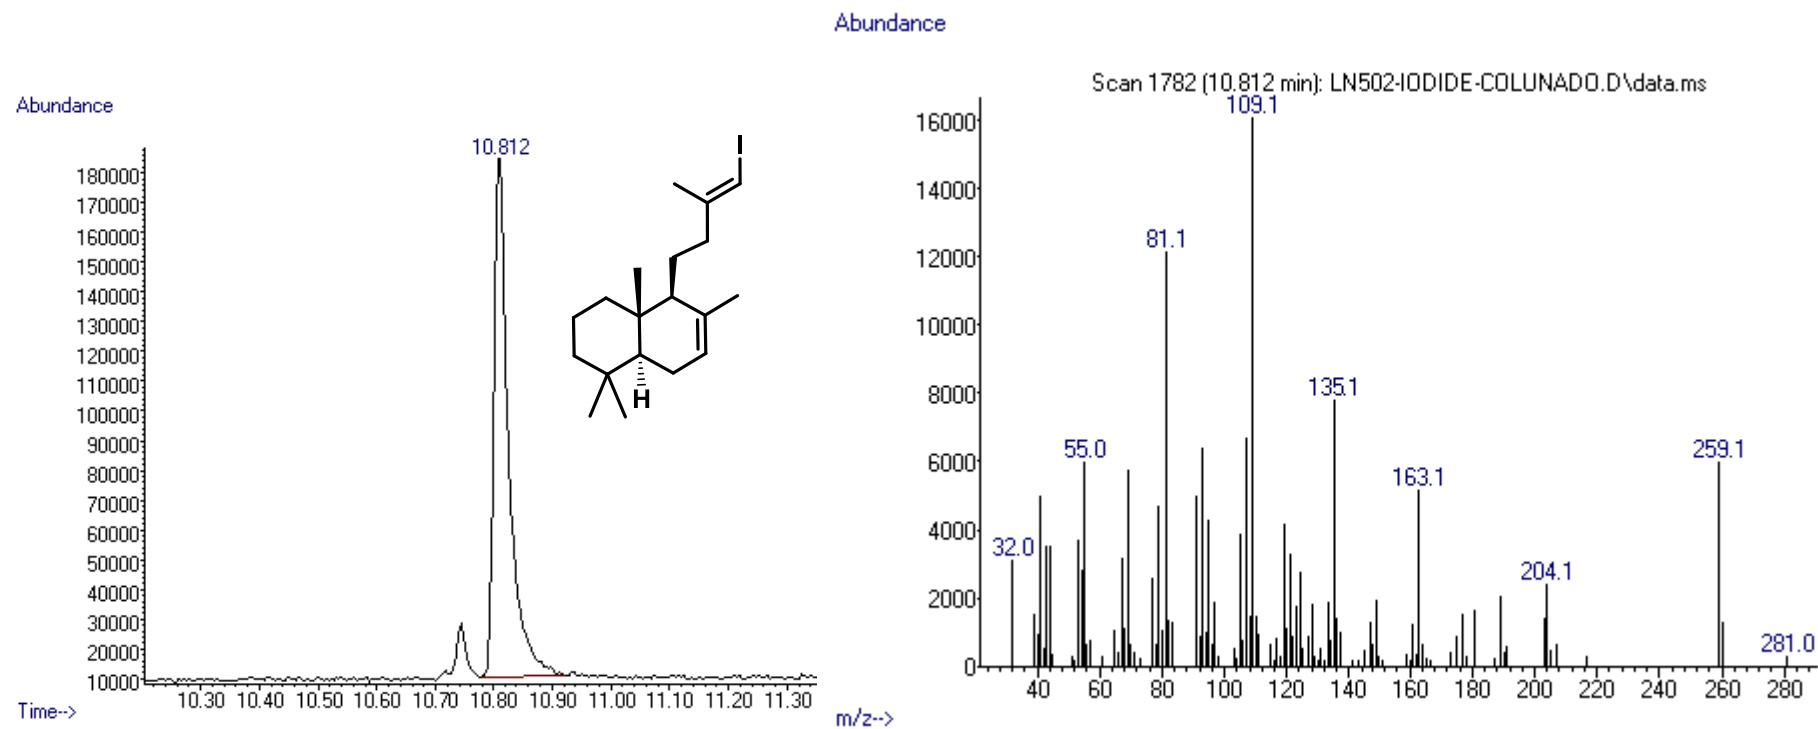

$t_R = 10.812 \text{ min}$ ,  $[M-I]^+ = 259.1$

**Figure S42.** GC/MS analysis of compound **2**.

**Table 1.** Comparison between  $^{13}\text{C}$  NMR spectra of compound **2** and reported by Xu and Ye<sup>5</sup>

| <b>Pastre (this work)</b> | <b>Xu and Ye<sup>5</sup></b> | <b><math>\Delta\delta</math></b> |
|---------------------------|------------------------------|----------------------------------|
| 13.6                      | 13.6                         | 0.0                              |
| 18.8                      | 18.8                         | 0.0                              |
| 21.8                      | 21.9                         | -0.1                             |
| 22.2                      | 22.2                         | 0.0                              |
| 23.8                      | 23.8                         | 0.0                              |
| 24.0                      | 24.1                         | 0.0                              |
| 25.6                      | 25.6                         | 0.0                              |
| 32.9                      | 33.0                         | -0.1                             |
| 33.1                      | 33.1                         | 0.0                              |
| 36.8                      | 36.8                         | 0.0                              |
| 39.2                      | 39.2                         | 0.0                              |
| 42.0                      | 42.0                         | 0.0                              |
| 42.3                      | 42.3                         | 0.0                              |
| 50.1                      | 50.1                         | 0.0                              |
| 54.3                      | 54.2                         | +0.1                             |
| 74.9                      | 74.9                         | 0.0                              |
| 122.6                     | 122.6                        | 0.0                              |
| 134.8                     | 134.8                        | 0.0                              |
| 148.5                     | 148.5                        | 0.0                              |



**1-(3,5-dimethoxyphenyl)allyl acetate (6).**

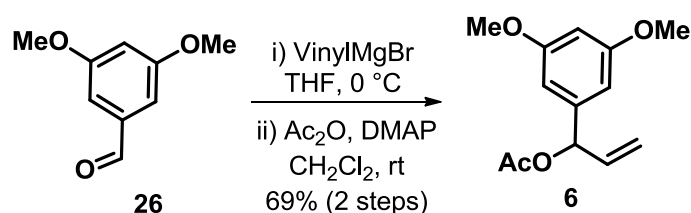

VinylMgBr (1 M in THF, 7.2 mL, 7.2 mmol, 2 equiv) was added dropwise to a solution of aldehyde **26** (610 mg, 3.6 mmol, 1 equiv) in THF (30 mL) at 0 °C. The reaction was stirred for 30 min at the same temperature and was then quenched by addition of saturated aqueous solution of NH<sub>4</sub>Cl (50 mL). The mixture was extracted with EtOAc (2 x 50 mL), the organic phases were combined, dried over anhydrous MgSO<sub>4</sub> and concentrated under reduced pressure. The residue was subjected to flash chromatography (SiO<sub>2</sub>, hexanes/EtOAc 90:10 to 60:40) to give the allylic alcohol intermediate along with minor impurities (550 mg, 2.83 mmol), this material was used in the next reaction.

The allylic alcohol was diluted in dry CH<sub>2</sub>Cl<sub>2</sub> (20 mL) and to this mixture were added Et<sub>3</sub>N (0.79 mL, 5.6 mmol, 2 equiv), DMAP (17 mg, 0.14 mmol, 5 mol %) and Ac<sub>2</sub>O (0.40 mL, 4.2 mmol, 1.5 equiv) at room temperature, and the reaction mixture was stirred for 1 h. The reaction was quenched by the addition of brine (20 mL) and was extracted with CH<sub>2</sub>Cl<sub>2</sub> (2 x 20 mL). The organic phases were combined, dried over anhydrous Na<sub>2</sub>SO<sub>4</sub> and concentrated under reduced pressure. The residue was subjected to flash chromatography (SiO<sub>2</sub>, hexanes/EtOAc 90:10) to give the acetate **6** (587 mg, 2.48 mmol) as a colorless oil in 69% overall yield (for 2 steps).

**TLC** (SiO<sub>2</sub>): R<sub>f</sub> = 0.39 (hexanes/EtOAc 90:10);

**IR** (ATR, cm<sup>-1</sup>): 2955, 2941, 2909, 2840, 1737, 1598, 1460, 1372, 1229, 1206, 1067, 933, 750;

**<sup>1</sup>H NMR** (250 MHz, CDCl<sub>3</sub>): δ 2.06 (s, 3H), 3.71 (s, 6H), 5.18 (dt, *J* = 10.3, 1.1 Hz, 1H), 5.27 (dt, *J* = 17.2, 1.1 Hz, 1H), 5.95 (ddd, *J* = 17.0, 10.4, 6.0 Hz, 1H), 6.17 (d, *J* = 6.0 Hz, 1H), 6.37 (t, *J* = 2.3 Hz, 1H), 6.50 (d, *J* = 2.2 Hz, 2H);

**<sup>13</sup>C NMR** (62.9 MHz, CDCl<sub>3</sub>): δ 20.9 (CH<sub>3</sub>), 55.1 (2CH<sub>3</sub>), 76.0 (CH), 99.8 (CH), 105.0 (2CH), 116.7 (CH<sub>2</sub>), 136.2 (CH), 141.3 (C), 160.9 (2C), 169.6 (C);

**HRMS** (ESI +): *m/z* calculated for C<sub>13</sub>H<sub>16</sub>O<sub>4</sub>Na<sup>+</sup> [M+Na]<sup>+</sup> 259.0941, found 259.0949.

|                        |                      |              |       |                      |                                                                     |               |          |                       |         |
|------------------------|----------------------|--------------|-------|----------------------|---------------------------------------------------------------------|---------------|----------|-----------------------|---------|
| Acquisition Time (sec) | 3.1654               | Comment      | LN482 | Date                 | 06 Mar 2017 11:43:12                                                |               |          |                       |         |
| Date Stamp             | 06 Mar 2017 11:43:12 |              |       | File Name            | C:\Users\Luiz\Desktop\Luiz\PhD\NMR\17-3-mar\mar07\ftH1\1\PDATA\1\1r |               |          |                       |         |
| Frequency (MHz)        | 250.13               | Nucleus      | 1H    | Number of Transients | 9                                                                   | Origin        | spect    | Original Points Count | 16384   |
| Owner                  | root                 | Points Count | 32768 | Pulse Sequence       | zg30                                                                | Receiver Gain | 50.80    | SW(cyclical) (Hz)     | 5175.98 |
| Solvent                | CHLOROFORM-d         |              |       | Spectrum Offset (Hz) | 1544.6561                                                           | Spectrum Type | STANDARD | Sweep Width (Hz)      | 5175.83 |
| Temperature (degree C) | 25.160               |              |       |                      |                                                                     |               |          |                       |         |

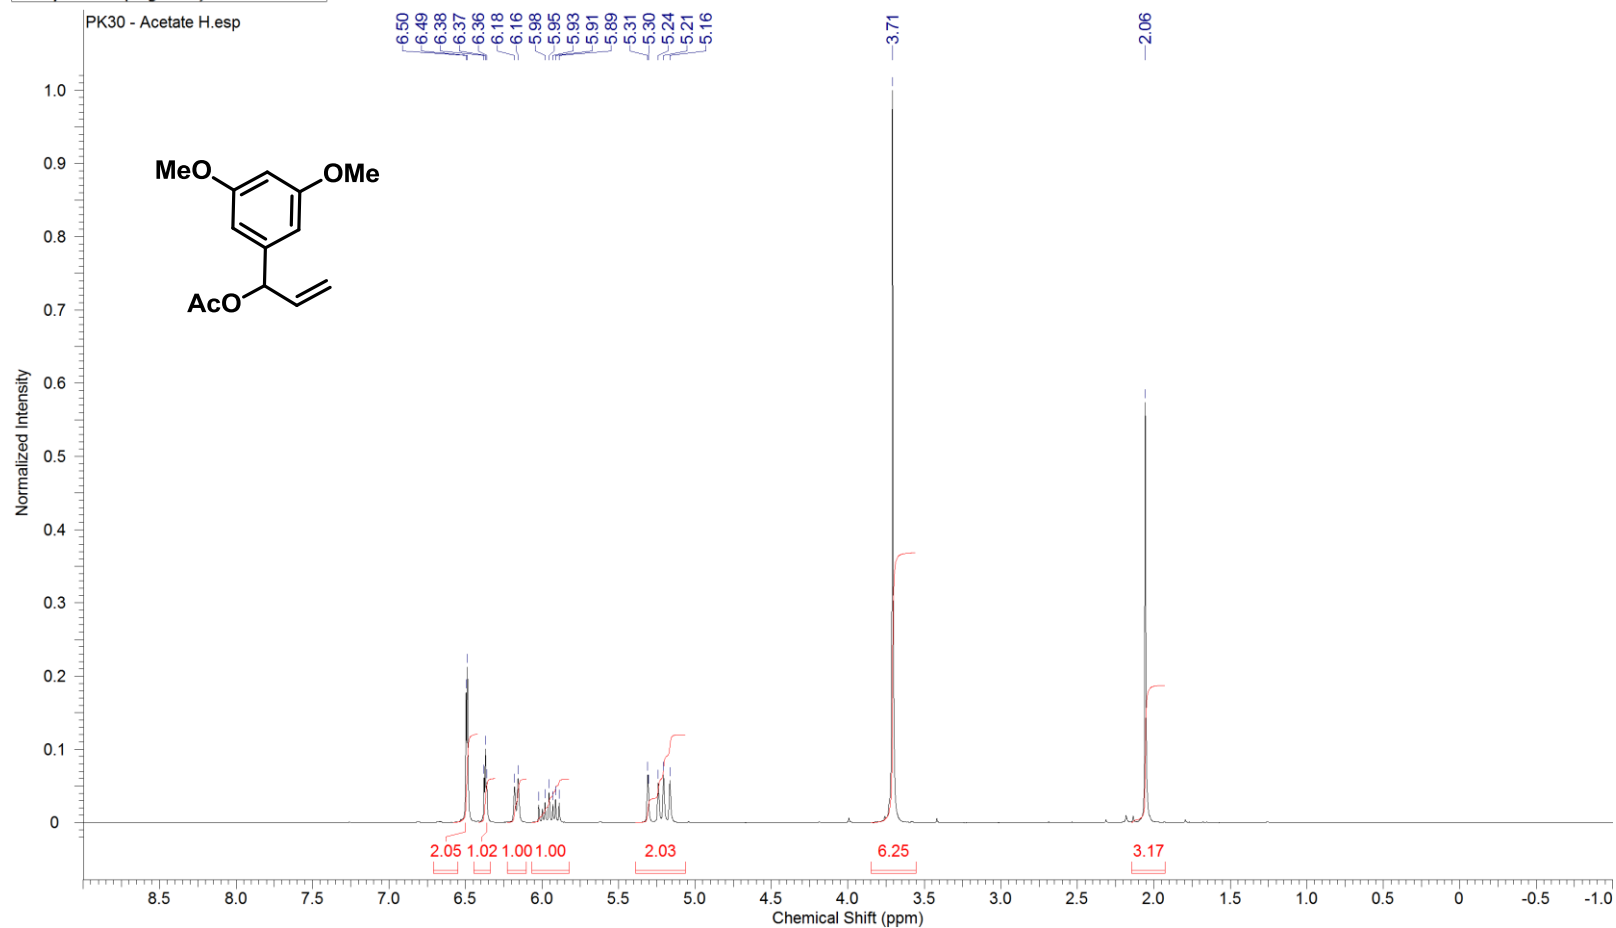

**Figure S43.**  $^1\text{H}$  NMR spectrum ( $\text{CDCl}_3$ , 250 MHz) of compound **6**.

|                        |                      |              |       |                      |                                                                    |                   |          |
|------------------------|----------------------|--------------|-------|----------------------|--------------------------------------------------------------------|-------------------|----------|
| Acquisition Time (sec) | 1.0879               | Comment      | LN482 | Date                 | 06 Mar 2017 11:47:28                                               |                   |          |
| Date Stamp             | 06 Mar 2017 11:47:28 |              |       | File Name            | C:\Users\Luiz\Desktop\Luiz\PhD\NMR\17-3-mar\mar07\ftH1\2\PDATA\11r |                   |          |
| Frequency (MHz)        | 62.90                | Nucleus      | 13C   | Number of Transients | 13                                                                 | Origin            | spect    |
| Owner                  | root                 | Points Count | 32768 | Pulse Sequence       | zgpg30                                                             | Receiver Gain     | 512.00   |
| Solvent                | CHLOROFORM-d         |              |       | Spectrum Offset (Hz) | 6289.0518                                                          | Spectrum Type     | STANDARD |
| Temperature (degree C) | 25.160               |              |       |                      |                                                                    | SW(cyclical) (Hz) | 15060.24 |
|                        |                      |              |       |                      |                                                                    | Sweep Width (Hz)  | 15059.78 |

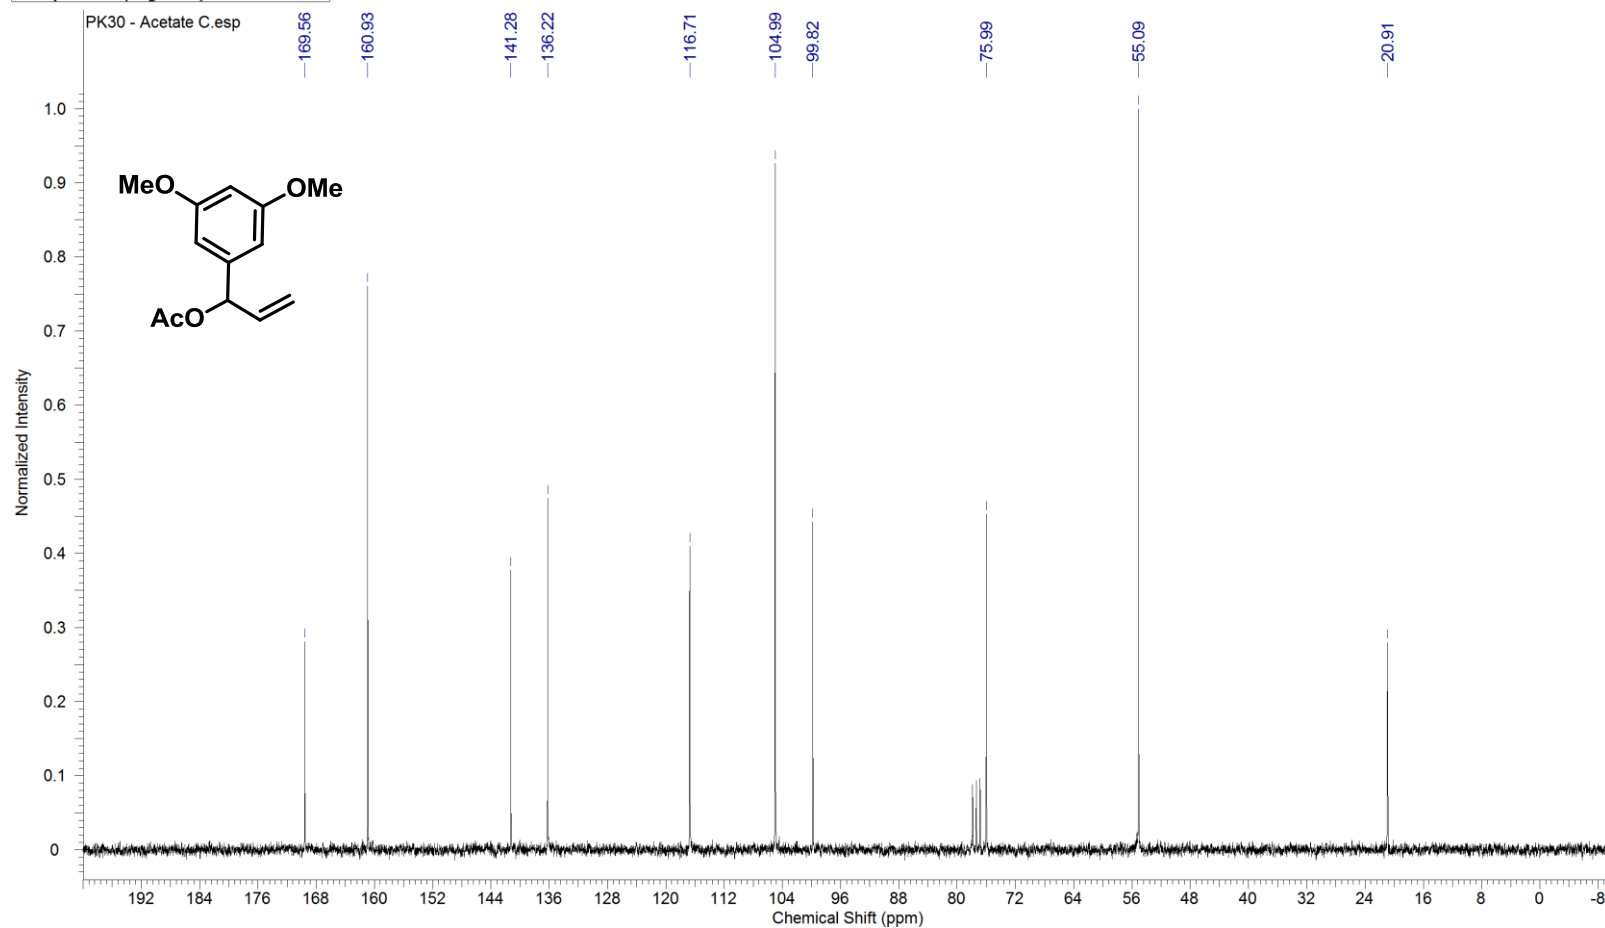

**Figure S44.** <sup>13</sup>C NMR spectrum (CDCl<sub>3</sub>, 62.9 MHz) of compound **6**.

|                        |                      |              |       |                      |                                                                     |                   |          |
|------------------------|----------------------|--------------|-------|----------------------|---------------------------------------------------------------------|-------------------|----------|
| Acquisition Time (sec) | 0.5439               | Comment      | LN482 | Date                 | 06 Mar 2017 11:47:28                                                |                   |          |
| Date Stamp             | 06 Mar 2017 11:47:28 |              |       | File Name            | C:\Users\Luiz\Desktop\Luiz\PhD\NMR\17-3-mar\mar07\ftH1\3\PDATA\1\1r |                   |          |
| Frequency (MHz)        | 62.90                | Nucleus      | 13C   | Number of Transients | 11                                                                  | Origin            | spect    |
| Owner                  | root                 | Points Count | 32768 | Pulse Sequence       | dept135                                                             | Receiver Gain     | 1625.50  |
| Solvent                | CHLOROFORM-d         |              |       | Spectrum Offset (Hz) | 6289.0518                                                           | Spectrum Type     | DEPT135  |
| Temperature (degree C) | 25.160               |              |       |                      |                                                                     | SW(cyclical) (Hz) | 15060.24 |
|                        |                      |              |       |                      |                                                                     | Sweep Width (Hz)  | 15059.78 |

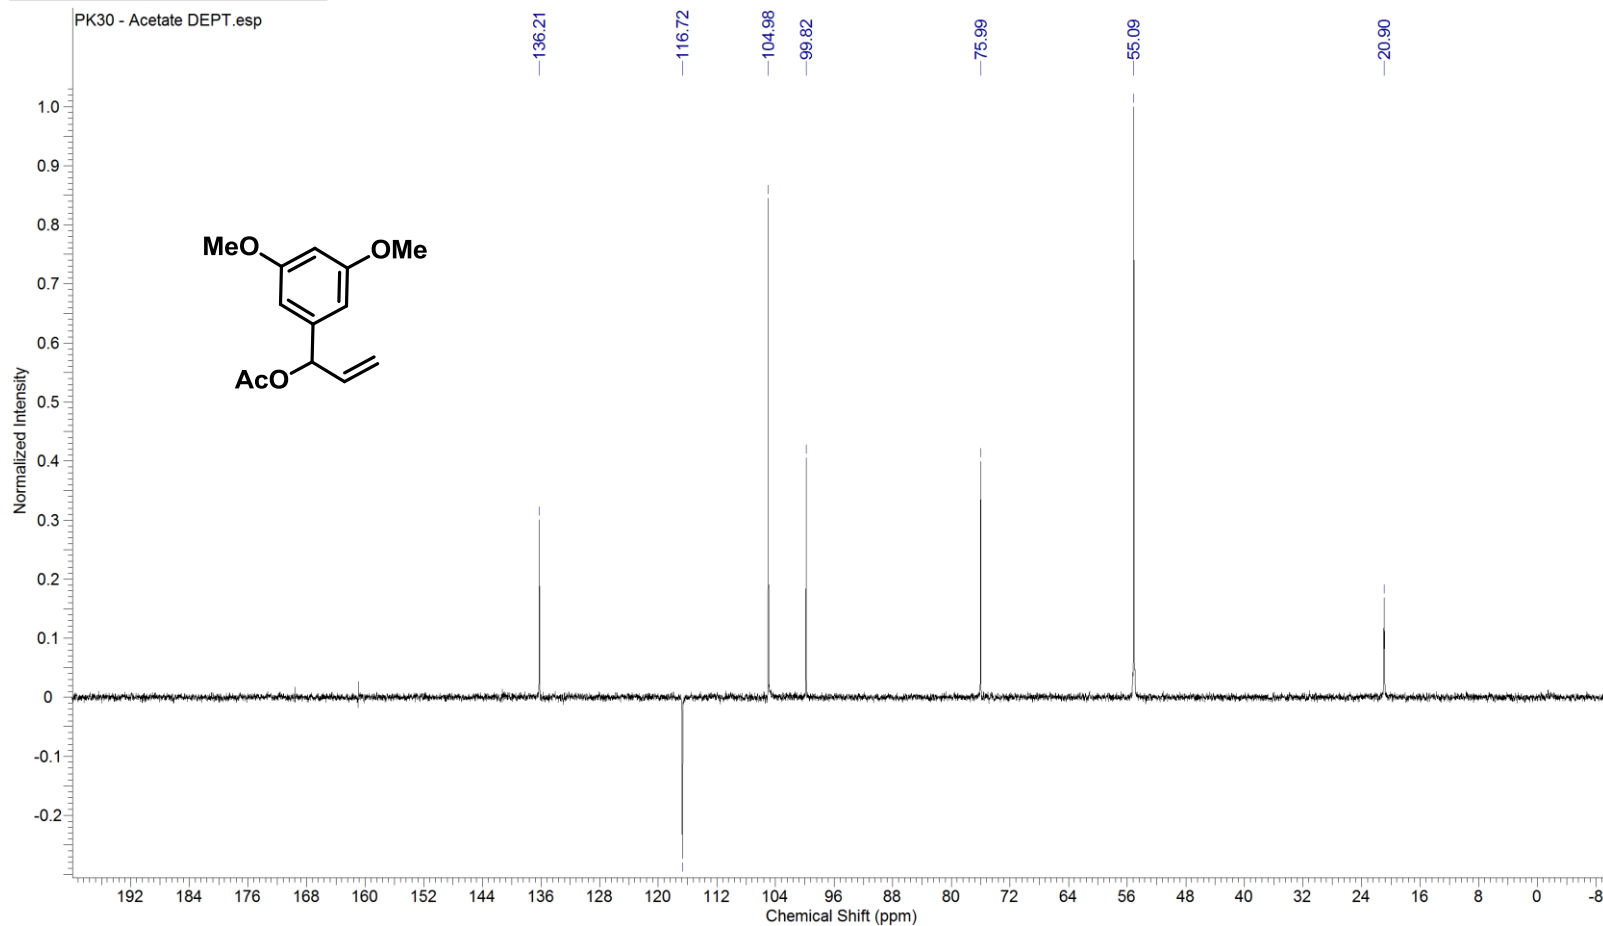

**Figure S45.** DEPT 135 NMR spectrum ( $\text{CDCl}_3$ , 62.9 MHz) of compound **6**.

**(S)-2-(3,5-dimethoxyphenyl)but-3-en-1-ol (18).**

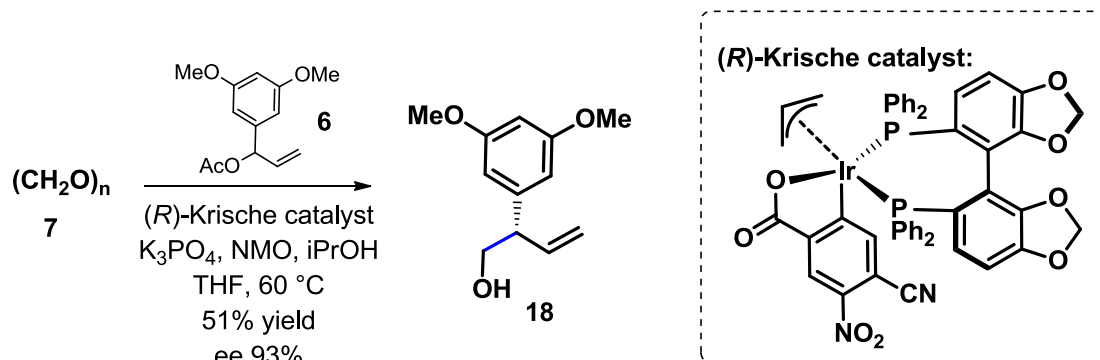

A pressure tube was charged with paraformaldehyde (**7**, 12.6 mg, 0.42 mmol of  $\text{CH}_2\text{O}$  units, 1 equiv),  $\text{K}_3\text{PO}_4$  (45.5 mg, 0.21 mmol, 0.5 equiv), (R)-Krische catalyst<sup>6</sup> (21.7 mg, 0.021 mmol, 5 mol %), NMO (39.4 mg, 0.34 mmol, 0.8 equiv) and allylic acetate **6** (149 mg, 0.63 mmol, 1.5 equiv). The tube was purged with argon, and dry THF (1.0 mL) was added followed by dry isopropyl alcohol (64.3  $\mu\text{L}$ , 0.84 mmol, 2 equiv), the pressure tube was sealed and heated at 60 °C for 36 h. After this period, the mixture was cooled to room temperature, the volatiles were removed under reduced pressure, and the residue was subjected to flash chromatography ( $\text{SiO}_2$ , hexanes/EtOAc 90:10 to 75:25) to give alcohol **18** (45 mg, 0.216 mmol) as a colorless oil in 51% yield.

**TLC** ( $\text{SiO}_2$ ):  $R_f$  = 0.23 (hexanes/EtOAc 75:25);

**ee** = 93% (determined by  $^{19}\text{F}$  NMR of Mosher ester derivatives);

$[\alpha]_D^{25}$  = +28 ( $c$  1.0,  $\text{CHCl}_3$ );

**IR** (ATR,  $\text{cm}^{-1}$ ): 3393 (broad), 3003, 2395, 2831, 1602, 1466, 1434, 1208, 1153, 1067, 917, 840;

**$^1\text{H}$  NMR** (250 MHz,  $\text{CDCl}_3$ ):  $\delta$  1.59 (br. s, 1H), 3.46 (q,  $J$  = 7.1 Hz, 1H), 3.78 (s, 6H), 3.76-3.87 (m, 2H), 5.14-5.27 (m, 2H), 5.89-6.07 (m, 1H), 6.36 (t,  $J$  = 2.1 Hz, 1H), 6.39 (d,  $J$  = 2.2 Hz, 2H);

**$^{13}\text{C}$  NMR** (62.9 MHz,  $\text{CDCl}_3$ ):  $\delta$  52.7 (CH), 55.3 (2 $\text{CH}_3$ ), 65.9 ( $\text{CH}_2$ ), 98.6 (CH), 106.1 (2CH), 117.1 ( $\text{CH}_2$ ), 137.9 (CH), 143.0 (C), 161.0 (2C);

**HRMS** (ESI +):  $m/z$  calculated for  $\text{C}_{12}\text{H}_{16}\text{O}_3\text{Na}^+$   $[\text{M}+\text{Na}]^+$  231.0992, found 231.0994.

<sup>6</sup> The catalyst was synthesized, with similar results, according to the procedure described in: Garza, V. J.; Krische, M. J. *J. Am. Chem. Soc.* **2016**, *138*, 3655-3658.

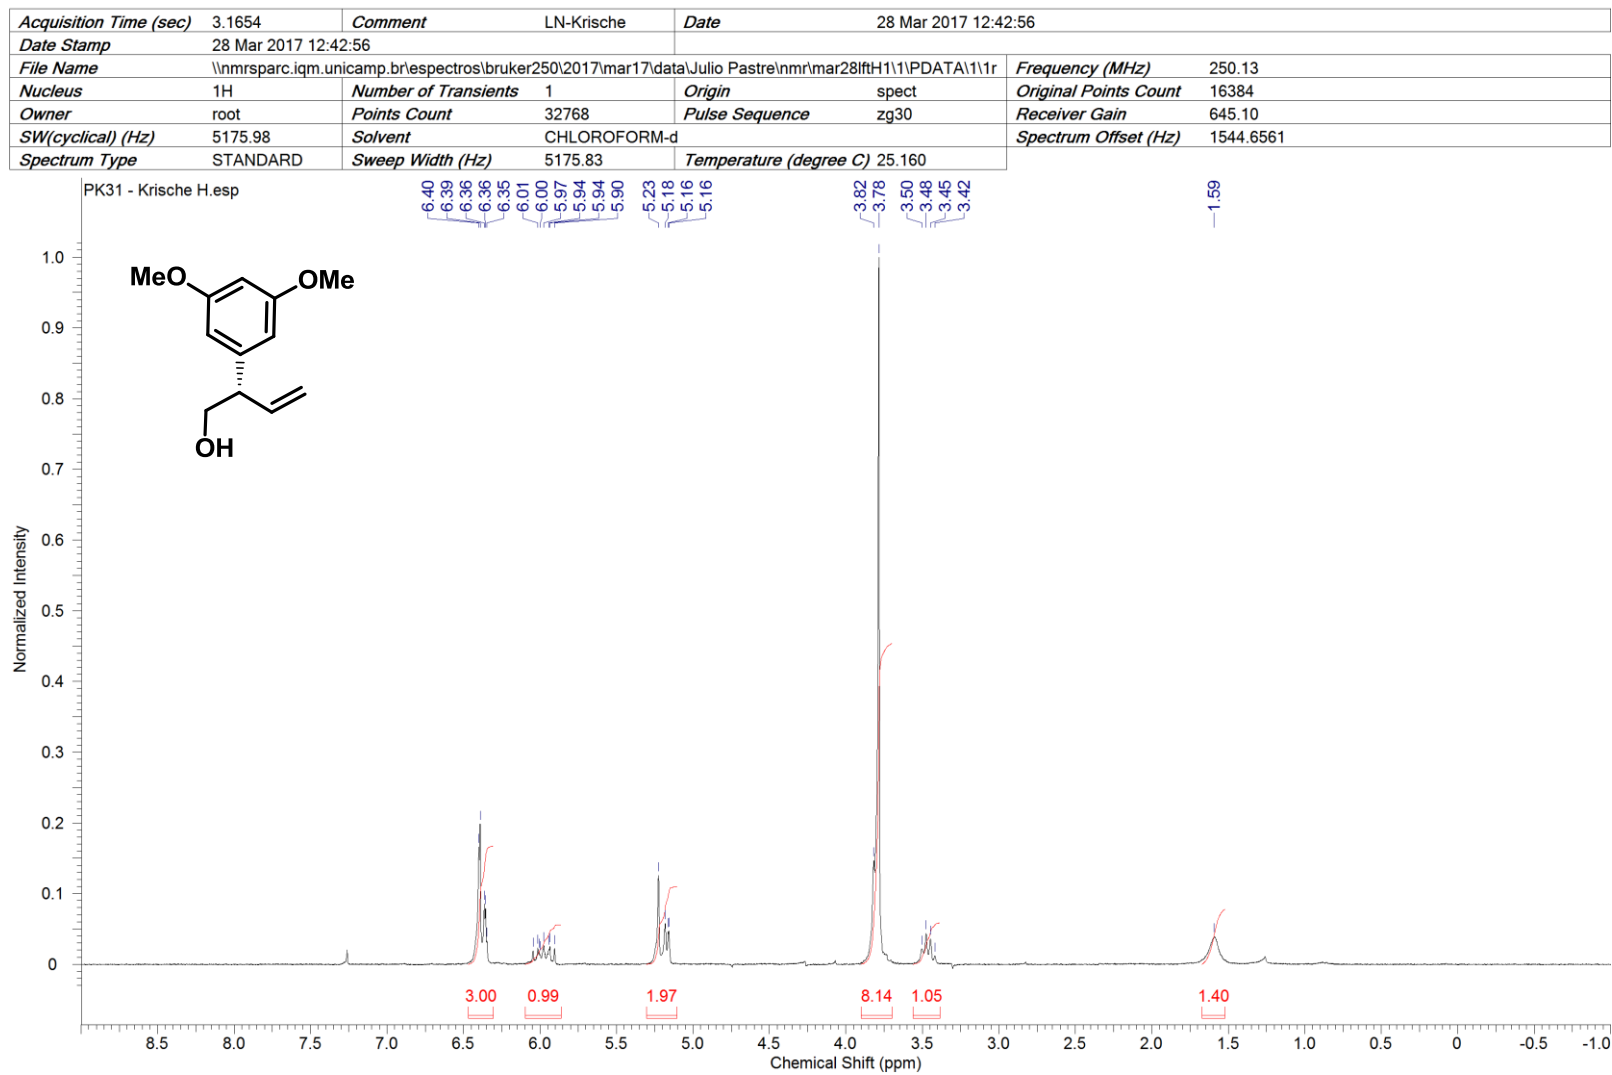

**Figure S46.** <sup>1</sup>H NMR spectrum (CDCl<sub>3</sub>, 250 MHz) of compound **18**.

|                        |                                                                                                      |                      |              |                        |                      |                       |                      |           |
|------------------------|------------------------------------------------------------------------------------------------------|----------------------|--------------|------------------------|----------------------|-----------------------|----------------------|-----------|
| Acquisition Time (sec) | 1.0879                                                                                               | Comment              | LN-Krische   | Date                   | 28 Mar 2017 12:42:56 |                       |                      |           |
| Date Stamp             | 28 Mar 2017 12:42:56                                                                                 |                      |              |                        |                      |                       |                      |           |
| File Name              | \\nmrparc.lqm.unicamp.br\spectros\bruker250\2017\mar17\data\Julio Pastre\nmr\mar28\ftH1\2\PDATA\1\1r |                      |              |                        | Frequency (MHz)      | 62.90                 |                      |           |
| Nucleus                | <sup>13</sup> C                                                                                      | Number of Transients | 100          | Origin                 | spect                | Original Points Count | 16384                |           |
| Owner                  | root                                                                                                 | Points Count         | 32768        | Pulse Sequence         | zgpg30               | Receiver Gain         | 724.10               |           |
| SW(cyclical) (Hz)      | 15060.24                                                                                             | Solvent              | CHLOROFORM-d |                        |                      |                       | Spectrum Offset (Hz) | 6289.0518 |
| Spectrum Type          | STANDARD                                                                                             | Sweep Width (Hz)     | 15059.78     | Temperature (degree C) | 25.160               |                       |                      |           |

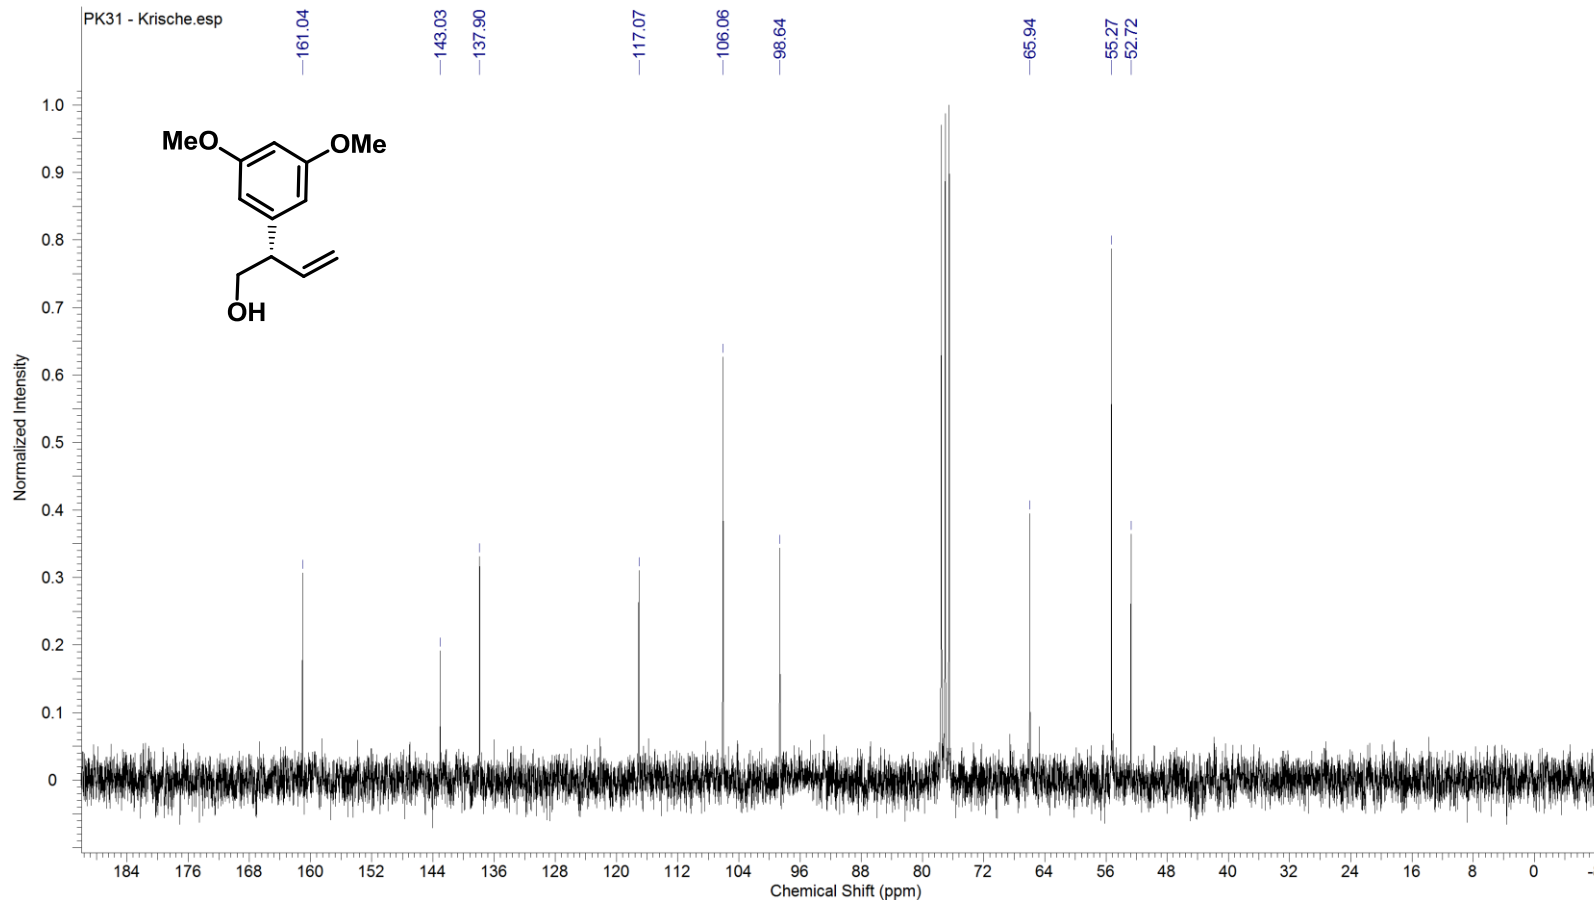

**Figure S47.** <sup>13</sup>C NMR spectrum (CDCl<sub>3</sub>, 62.9 MHz) of compound **18**.

|                        |                                                                                                      |                      |              |                        |                      |                       |           |
|------------------------|------------------------------------------------------------------------------------------------------|----------------------|--------------|------------------------|----------------------|-----------------------|-----------|
| Acquisition Time (sec) | 0.5439                                                                                               | Comment              | LN-Krische   | Date                   | 28 Mar 2017 12:49:20 |                       |           |
| Date Stamp             | 28 Mar 2017 12:49:20                                                                                 |                      |              |                        |                      |                       |           |
| File Name              | \\nmrparc.lqm.unicamp.br\spectros\bruker250\2017\mar17\data\Julio Pastre\nmr\mar28\ftH1\3\PDATA\1\1r |                      |              |                        | Frequency (MHz)      | 62.90                 |           |
| Nucleus                | <sup>13</sup> C                                                                                      | Number of Transients | 64           | Origin                 | spect                | Original Points Count | 8192      |
| Owner                  | root                                                                                                 | Points Count         | 32768        | Pulse Sequence         | dept135              | Receiver Gain         | 1290.20   |
| SW(cyclical) (Hz)      | 15060.24                                                                                             | Solvent              | CHLOROFORM-d |                        |                      | Spectrum Offset (Hz)  | 6289.0518 |
| Spectrum Type          | DEPT135                                                                                              | Sweep Width (Hz)     | 15059.78     | Temperature (degree C) | 25.160               |                       |           |

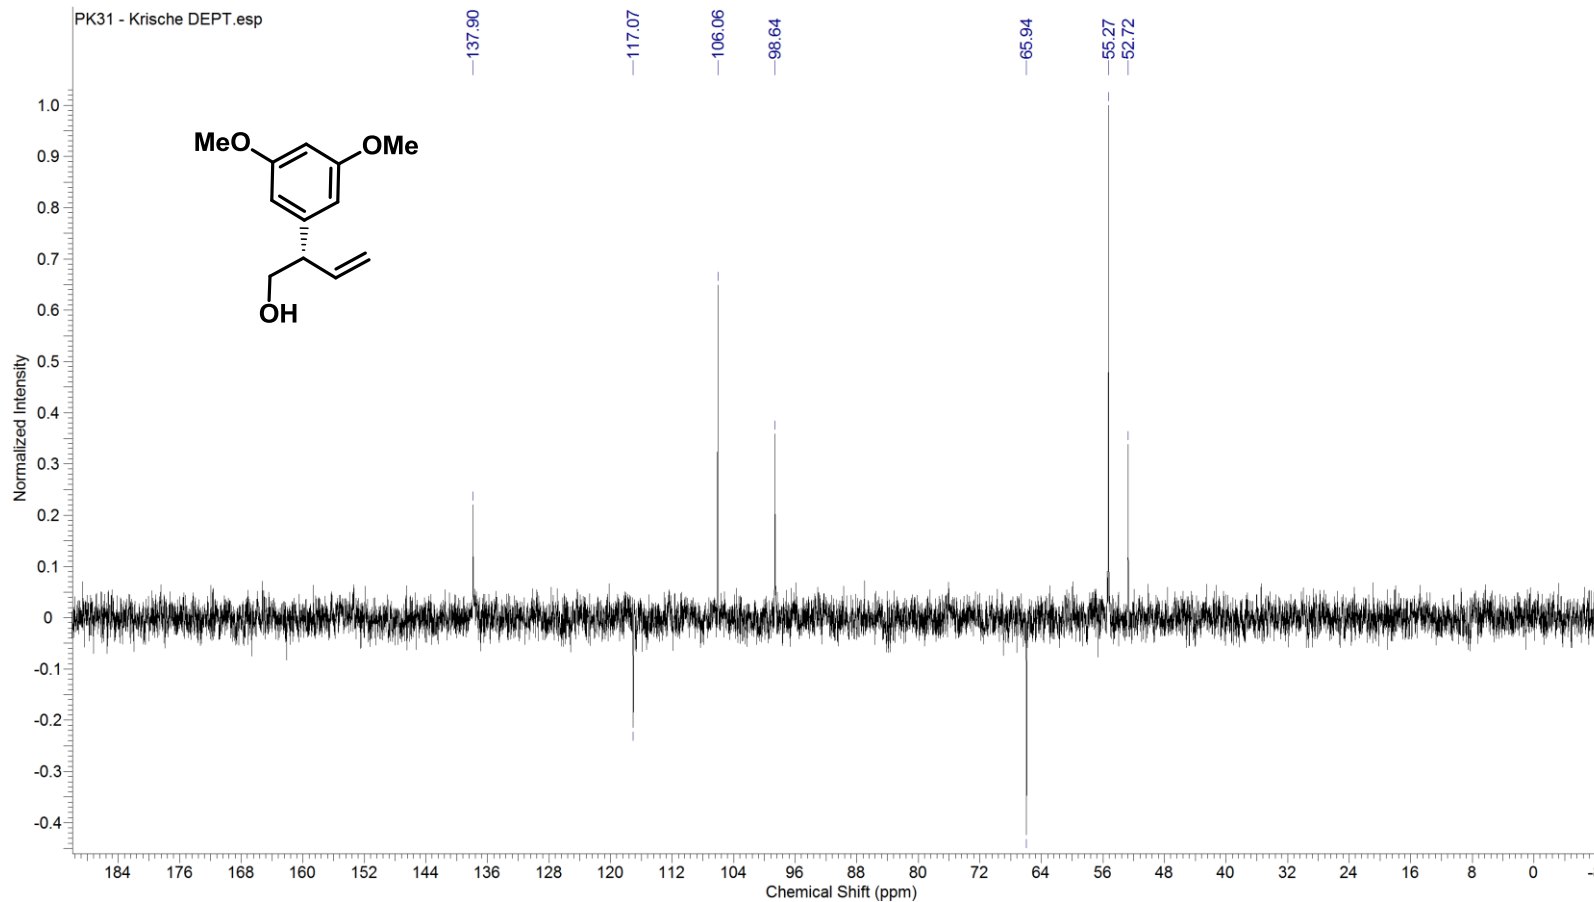

**Figure S48.** DEPT 135 NMR spectrum ( $\text{CDCl}_3$ , 62.9 MHz) of compound **18**.





|                        |                      |                   |            |                        |                                                                     |
|------------------------|----------------------|-------------------|------------|------------------------|---------------------------------------------------------------------|
| Acquisition Time (sec) | 1.1600               | Comment           | Mosher-chr | Date                   | 31 Mar 2017 16:26:56                                                |
| Date Stamp             | 31 Mar 2017 16:26:56 |                   |            | File Name              | C:\Users\Luiz\Desktop\Luiz\PhD\NMR\17-3-mar\mar31\ftH2\2\pdata\1\1r |
| Frequency (MHz)        | 235.36               | Nucleus           | 19F        | Number of Transients   | 33                                                                  |
| Original Points Count  | 65536                | Owner             | psm        | Points Count           | 65536                                                               |
| Receiver Gain          | 645.10               | SW(cyclical) (Hz) | 56497.18   | Solvent                | CHLOROFORM-d                                                        |
| Spectrum Offset (Hz)   | -23536.0215          | Spectrum Type     | STANDARD   | Sweep Width (Hz)       | 56496.31                                                            |
|                        |                      |                   |            | Temperature (degree C) | 25.160                                                              |

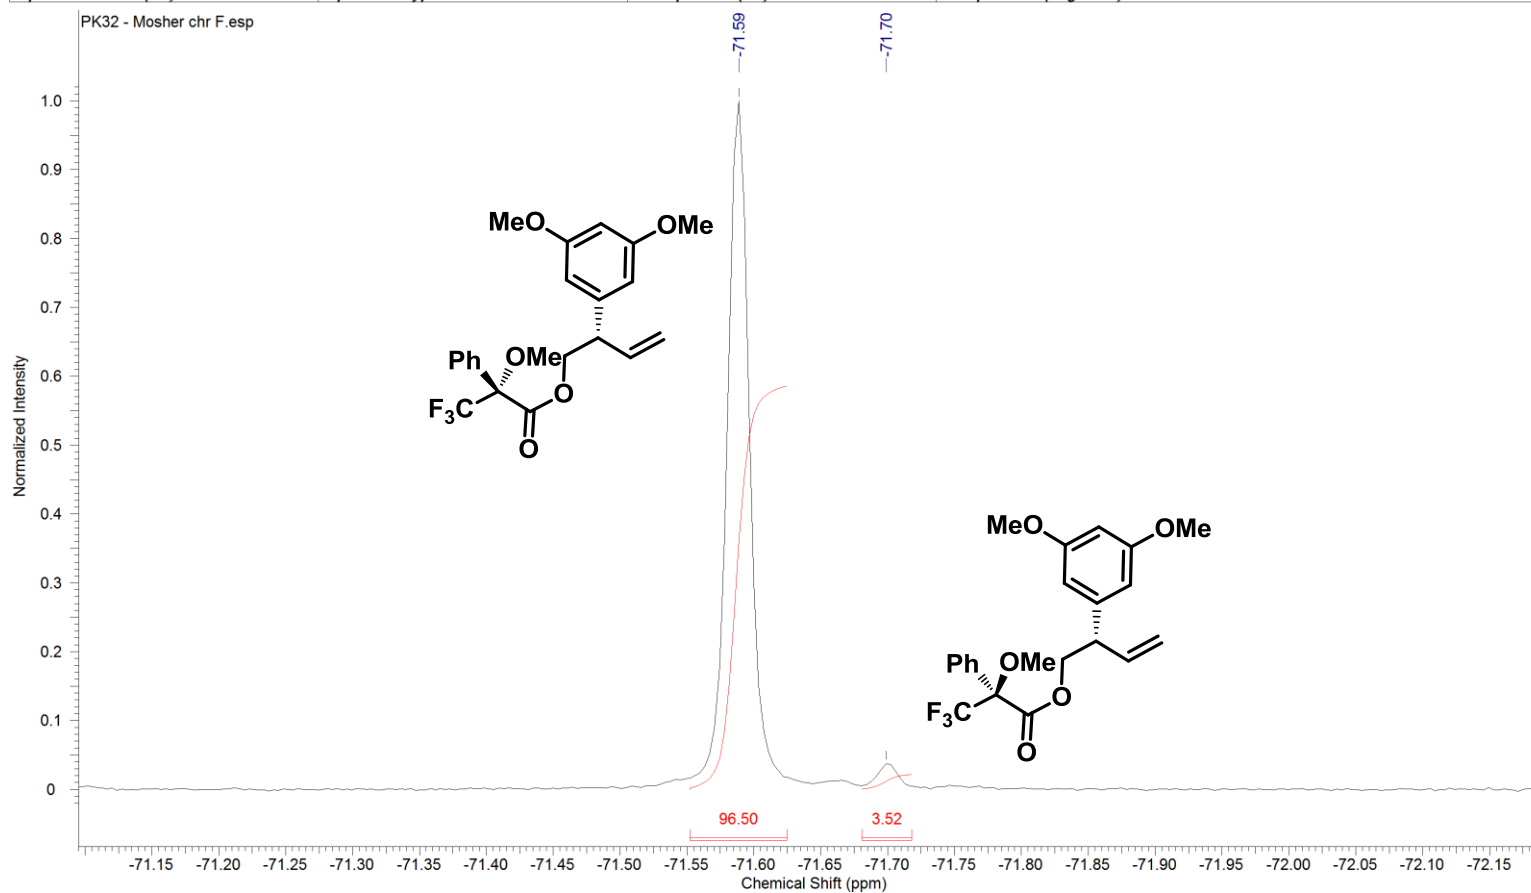

**Figure S50.**  $^{19}\text{F}$  NMR spectrum ( $\text{CDCl}_3$ , 235 MHz) of Mosher's esters prepared with (S)-Mosher acyl chloride.

**(S)-tert-butyl((2-(3,5-dimethoxyphenyl)but-3-en-1-yl)oxy)diphenylsilane (19).**

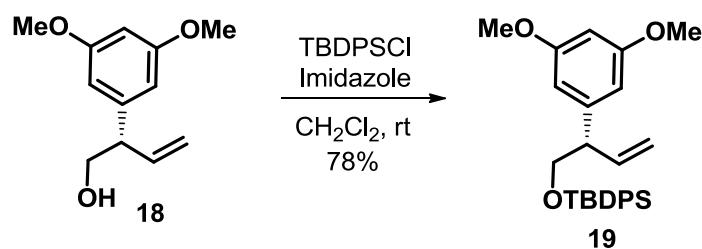

Imidazole (27 mg, 0.40 mmol, 2 equiv) and TBDPSCI (80  $\mu$ L, 0.30 mmol, 1.5 equiv) were added to a solution of alcohol **18** (41.7 mg, 0.20 mmol, 1 equiv) in  $\text{CH}_2\text{Cl}_2$  (10 mL) at room temperature. After stirring the reaction for 18 h,  $\text{H}_2\text{O}$  (15 mL) was added, and the mixture was extracted with  $\text{CH}_2\text{Cl}_2$  (20 mL). The combined organic phase was dried over anhydrous  $\text{Na}_2\text{SO}_4$  and concentrated under reduced pressure. The residue was purified by flash chromatography ( $\text{SiO}_2$ , hexanes/EtOAc 90:10) to give the silyl ether **19** (70 mg, 0.16 mmol) as a colorless oil in 78% yield.

**TLC** ( $\text{SiO}_2$ ):  $R_f$  = 0.40 (hexanes/EtOAc 90:10);

$[\alpha]_D^{25}$  = +10 ( $c$  1.0,  $\text{CHCl}_3$ );

**IR** (ATR,  $\text{cm}^{-1}$ ): 3073, 2955, 2933, 2859, 1598, 1463, 1430, 1206, 1156, 1113, 1070, 1000, 828, 705, 616;

**$^1\text{H}$  NMR** (250 MHz,  $\text{CDCl}_3$ ):  $\delta$  1.07 (s, 9H), 3.50 (q,  $J$  = 7.0 Hz, 1H), 3.78 (s, 6H), 3.84–4.00 (m, 2H), 5.13–5.24 (m, 2H), 6.10 (ddd,  $J$  = 16.4, 11.2, 7.4 Hz, 1H), 6.39 (s, 3H), 7.33–7.50 (m, 6H), 7.58–7.69 (m, 4H);

**$^{13}\text{C}$  NMR** (62.9 MHz,  $\text{CDCl}_3$ ):  $\delta$  19.3 (C), 29.9 (3 $\text{CH}_3$ ), 52.5 (CH), 55.2 (2 $\text{CH}_3$ ), 67.6 ( $\text{CH}_2$ ), 98.6 (CH), 106.4 (2CH), 116.2 ( $\text{CH}_2$ ), 127.6 (4CH), 129.6 (2CH), 133.7 (C), 133.8 (C), 135.66 (2CH), 135.70 (2CH), 138.6 (CH), 144.2 (C), 160.7 (2C);

**HRMS** (ESI +):  $m/z$  calculated for  $\text{C}_{28}\text{H}_{34}\text{O}_3\text{SiNa}^+$   $[\text{M}+\text{Na}]^+$  469.2169, found 469.2158.

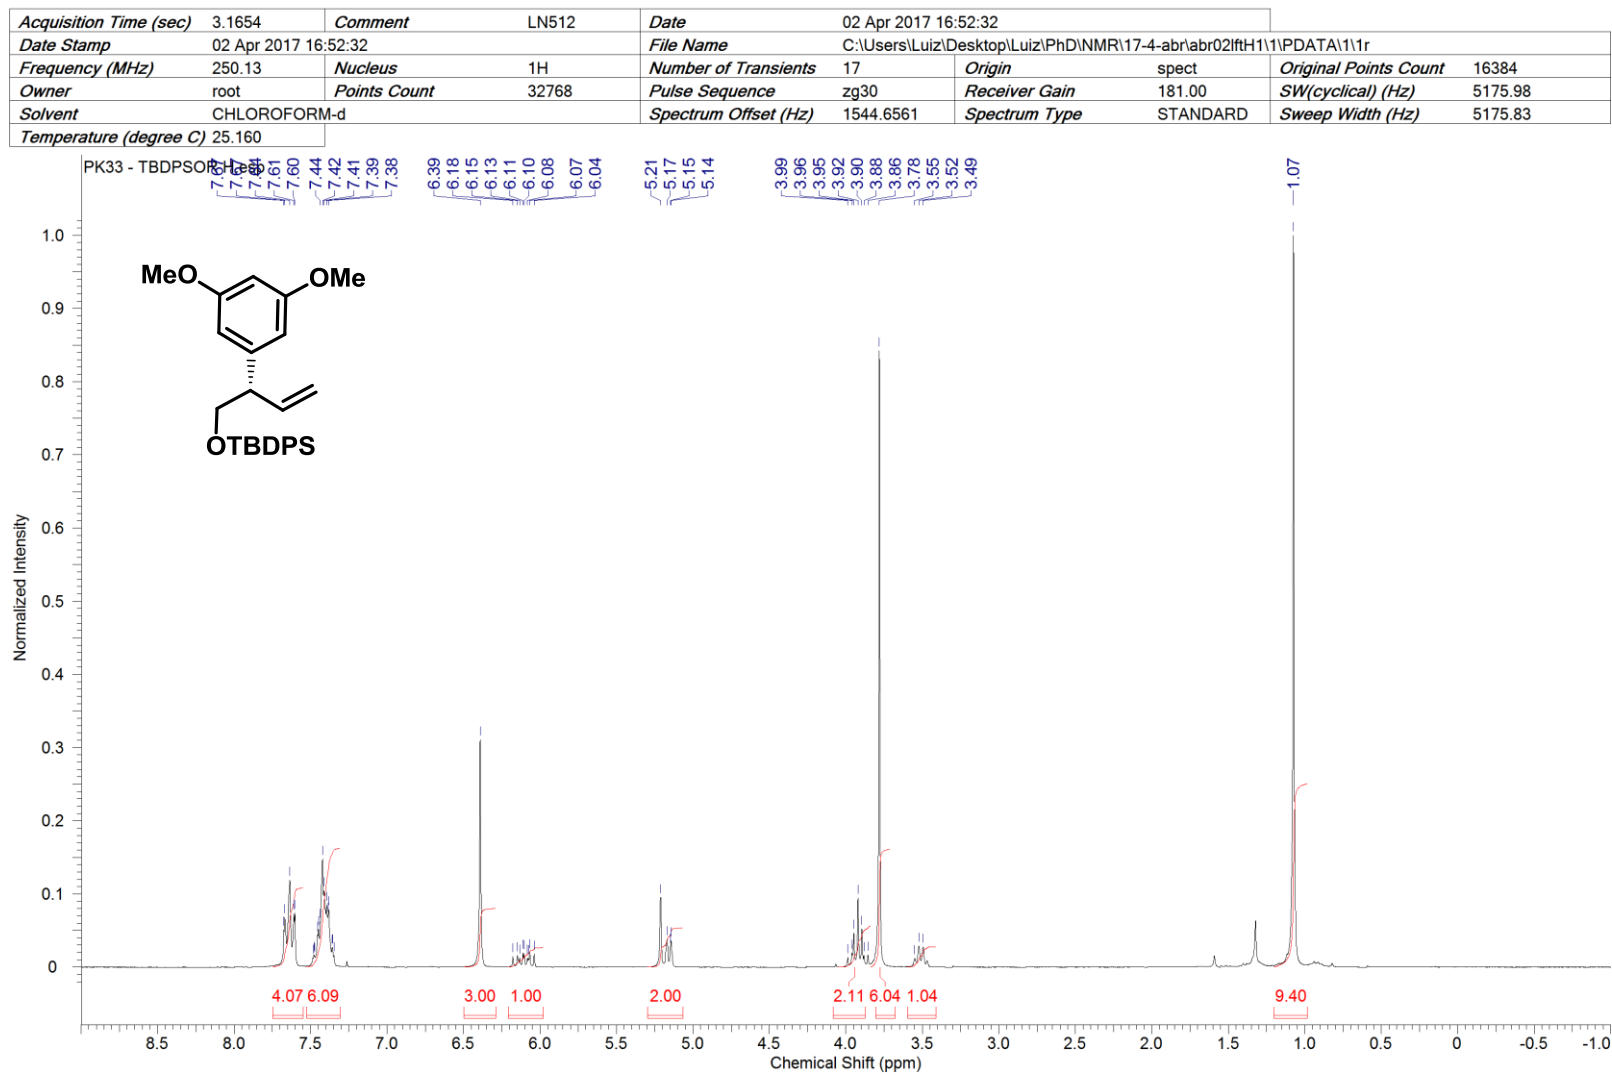

**Figure S51.**  $^1\text{H}$  NMR spectrum ( $\text{CDCl}_3$ , 250 MHz) of compound **19**.

|                        |                      |              |       |                      |                                                                     |                   |          |
|------------------------|----------------------|--------------|-------|----------------------|---------------------------------------------------------------------|-------------------|----------|
| Acquisition Time (sec) | 1.0879               | Comment      | LN512 | Date                 | 02 Apr 2017 16:54:40                                                |                   |          |
| Date Stamp             | 02 Apr 2017 16:54:40 |              |       | File Name            | C:\Users\Luiz\Desktop\Luiz\PhD\NMR\17-4-abr\abr02\ftH1\2\PDATA\1\1r |                   |          |
| Frequency (MHz)        | 62.90                | Nucleus      | 13C   | Number of Transients | 30                                                                  | Origin            | spect    |
| Owner                  | root                 | Points Count | 32768 | Pulse Sequence       | zgpg30                                                              | Receiver Gain     | 645.10   |
| Solvent                | CHLOROFORM-d         |              |       | Spectrum Offset (Hz) | 6289.0518                                                           | Spectrum Type     | STANDARD |
| Temperature (degree C) | 25.160               |              |       |                      |                                                                     | SW(cyclical) (Hz) | 15060.24 |
|                        |                      |              |       |                      |                                                                     | Sweep Width (Hz)  | 15059.78 |

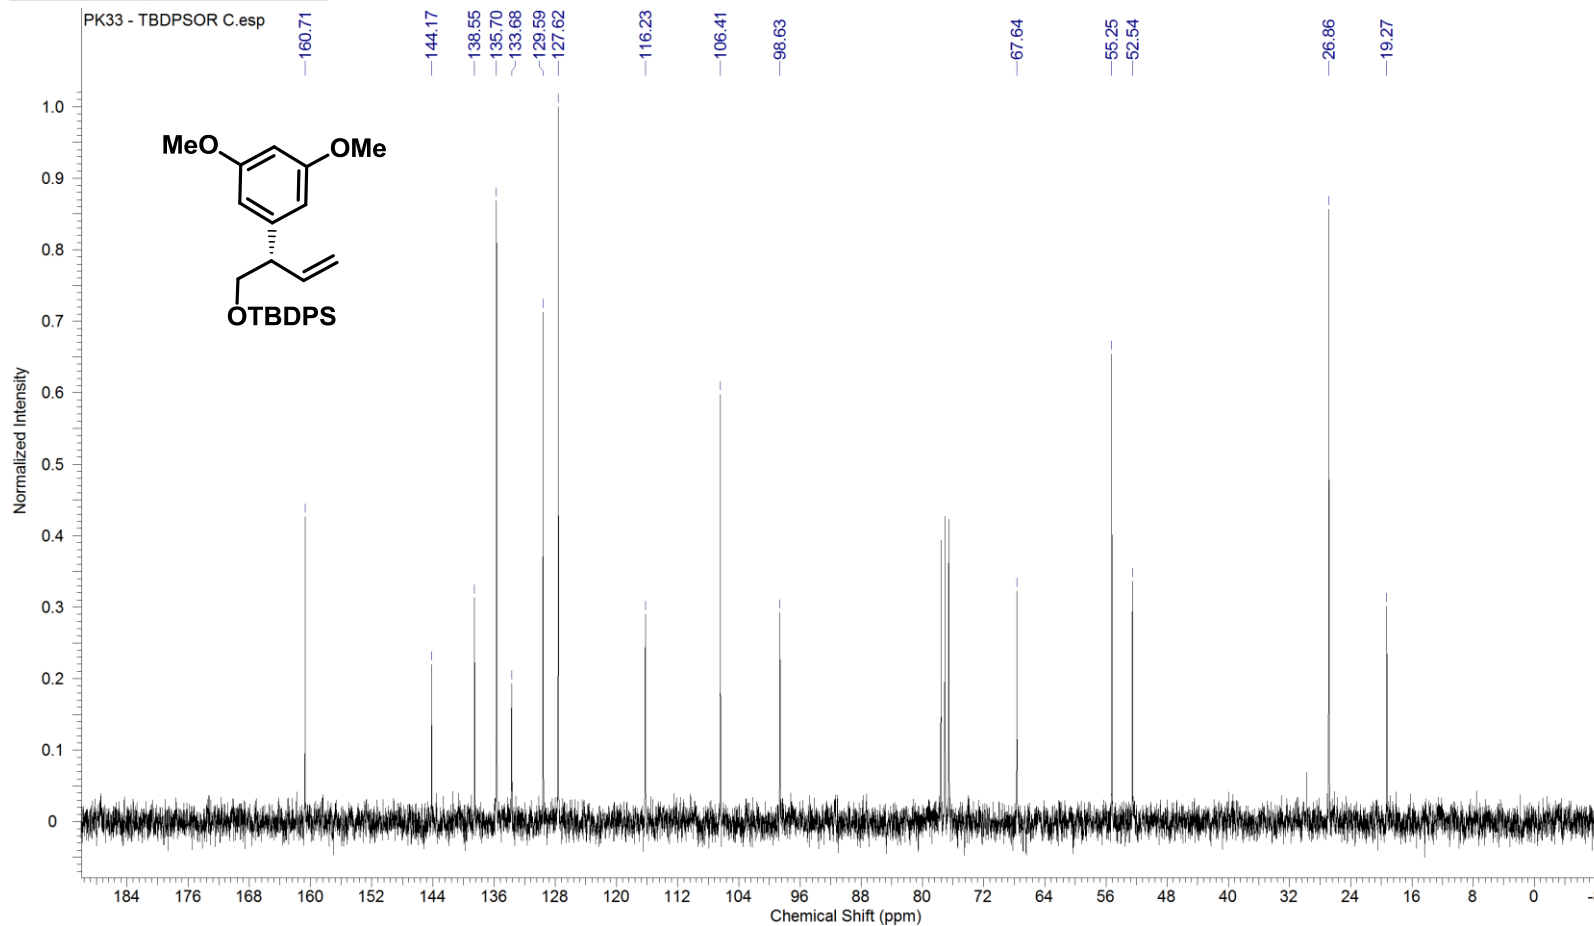

**Figure S52.**  $^{13}\text{C}$  NMR spectrum ( $\text{CDCl}_3$ , 62.9 MHz) of compound **19**.

|                        |                      |              |       |                      |                                                                     |               |         |                       |          |
|------------------------|----------------------|--------------|-------|----------------------|---------------------------------------------------------------------|---------------|---------|-----------------------|----------|
| Acquisition Time (sec) | 0.5439               | Comment      | LN512 | Date                 | 02 Apr 2017 16:58:56                                                |               |         |                       |          |
| Date Stamp             | 02 Apr 2017 16:58:56 |              |       | File Name            | C:\Users\Luiz\Desktop\Luiz\PhD\NMR\17-4-abr\abr02\ftH1\3\PDATA\1\1r |               |         |                       |          |
| Frequency (MHz)        | 62.90                | Nucleus      | 13C   | Number of Transients | 14                                                                  | Origin        | spect   | Original Points Count | 8192     |
| Owner                  | root                 | Points Count | 32768 | Pulse Sequence       | dept135                                                             | Receiver Gain | 812.70  | SW(cyclical) (Hz)     | 15060.24 |
| Solvent                | CHLOROFORM-d         |              |       | Spectrum Offset (Hz) | 6289.0518                                                           | Spectrum Type | DEPT135 | Sweep Width (Hz)      | 15059.78 |
| Temperature (degree C) | 25.160               |              |       |                      |                                                                     |               |         |                       |          |

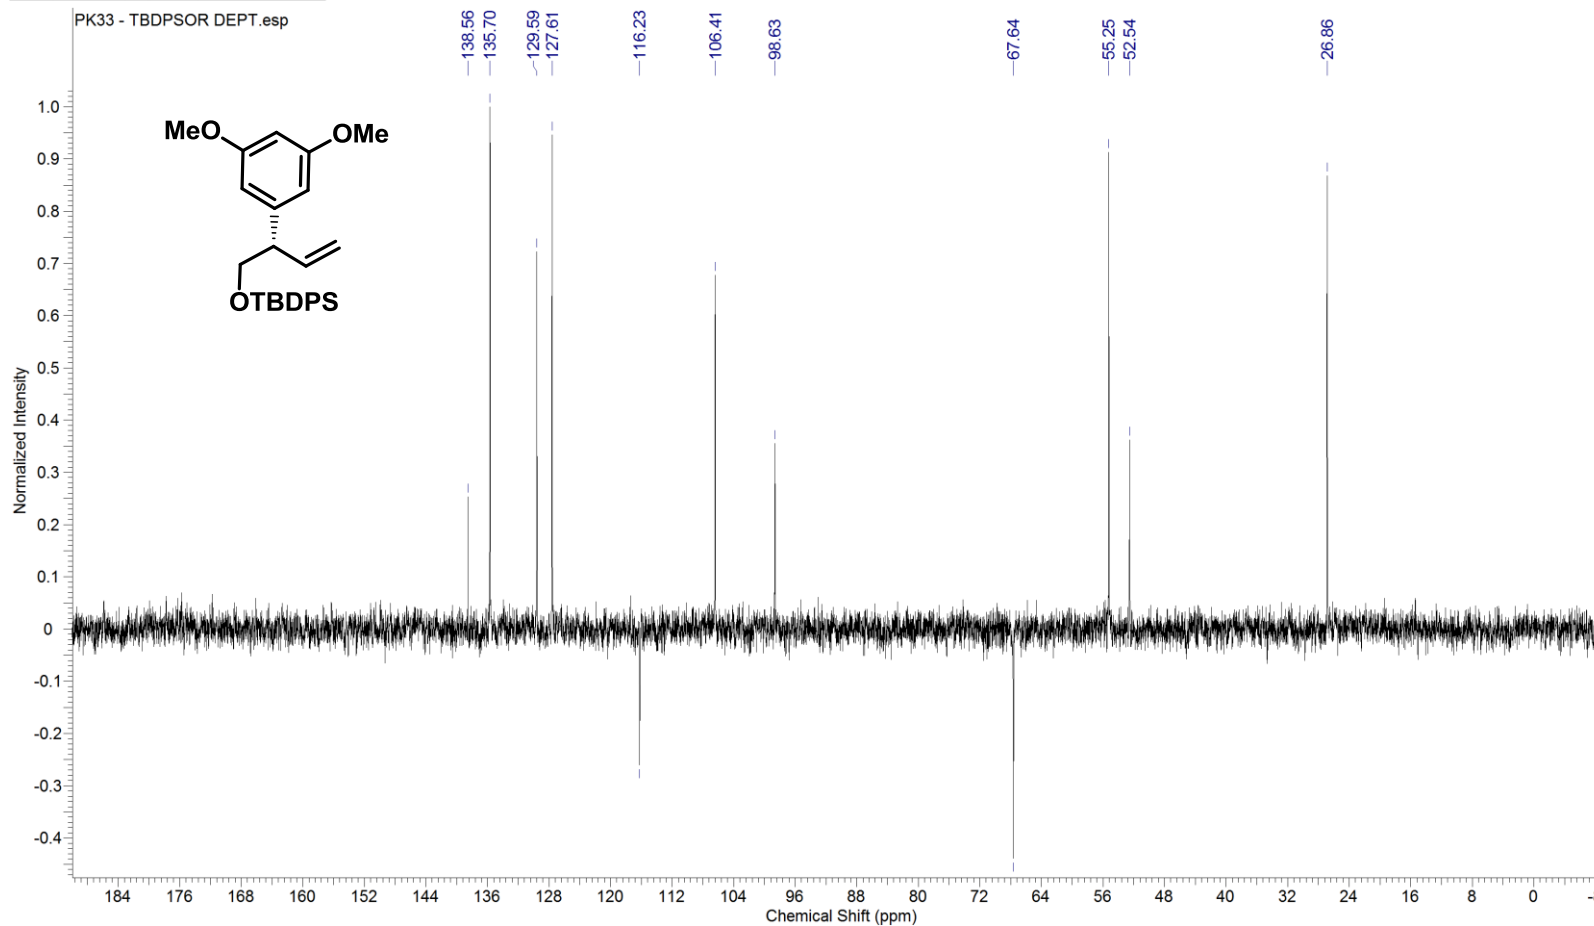

**Figure S53.** DEPT 135 NMR spectrum ( $\text{CDCl}_3$ , 62.9 MHz) of compound **19**.

**(*S,E*)-5-((*tert*-butyldiphenylsilyl)oxy)-4-(3,5-dimethoxyphenyl)pent-2-enal (**20**).**

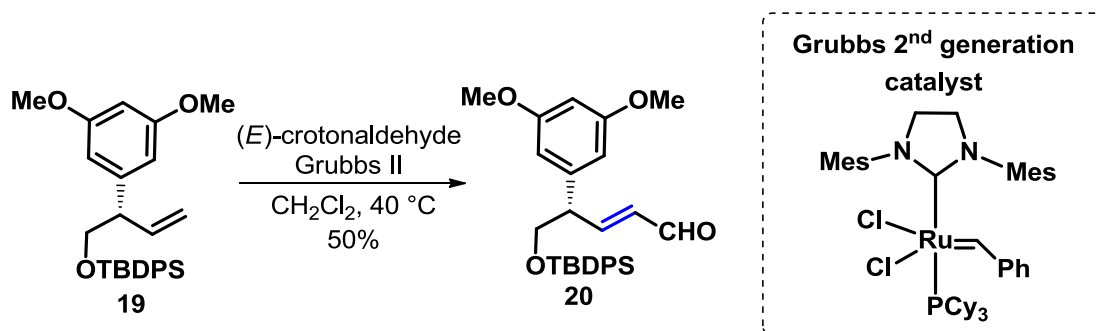

Freshly distilled (*E*)-crotonaldehyde (60  $\mu\text{L}$ , 0.65 mmol, 5 equiv) was added to a solution of alkene **19** (58 mg, 0.13 mmol, 1 equiv) in  $\text{CH}_2\text{Cl}_2$  (1.3 mL). Next, 2<sup>nd</sup> generation Grubbs' catalyst (11 mg, 13  $\mu\text{mol}$ , 10 mol %) was added and the mixture was stirred at  $40^\circ\text{C}$  for 18 h. The reaction contents were directly subjected to flash chromatography ( $\text{SiO}_2$ , hexanes/EtOAc 90:10) to give enal **20** (31 mg, 65  $\mu\text{mol}$ ) as a colorless oil in 50% yield.

**TLC** ( $\text{SiO}_2$ ):  $R_f = 0.20$  (hexanes/EtOAc 90:10);

$[\alpha]_D^{25} = +10$  ( $c$  1.0,  $\text{CHCl}_3$ );

**IR** (ATR,  $\text{cm}^{-1}$ ): 2954, 2929, 2857, 1693, 1598, 1460, 1430, 1206, 1156, 1115, 826, 745, 704;

**$^1\text{H}$  NMR** (250 MHz,  $\text{CDCl}_3$ ):  $\delta$  1.04 (s, 9H), 3.67 (q,  $J = 6.9$  Hz, 1H), 3.74 (s, 6H), 3.92-3.99 (m, 2H), 6.17 (ddd,  $J = 15.8, 7.9, 1.3$  Hz, 1H), 6.26 (d,  $J = 2.2$  Hz, 2H), 6.36 (t,  $J = 2.2$  Hz, 1H), 6.99 (dd,  $J = 15.8, 6.9$  Hz, 1H), 7.32-7.48 (m, 6H), 7.54-7.63 (m, 4H), 9.52 (d,  $J = 7.7$  Hz, 1H);

**$^{13}\text{C}$  NMR** (62.9 MHz,  $\text{CDCl}_3$ ):  $\delta$  19.2 (C), 26.8 (3 $\text{CH}_3$ ), 51.4 (CH), 55.3 (2 $\text{CH}_3$ ), 66.6 ( $\text{CH}_2$ ), 99.0 (CH), 106.4 (2CH), 127.7 (4CH), 129.8 (2CH), 133.2 (2C), 133.6 (CH), 135.58 (2CH), 135.61 (2CH), 141.1 (C), 157.6 (CH), 161.0 (2C), 193.9 (CH);

**HRMS** (ESI +):  $m/z$  calculated for  $\text{C}_{29}\text{H}_{34}\text{O}_4\text{SiNa}^+$   $[\text{M}+\text{Na}]^+$  497.2119, found 497.2117.





|                        |                      |              |       |                      |                                                                      |                   |          |
|------------------------|----------------------|--------------|-------|----------------------|----------------------------------------------------------------------|-------------------|----------|
| Acquisition Time (sec) | 1.0879               | Comment      | LN518 | Date                 | 08 Apr 2017 14:12:32                                                 |                   |          |
| Date Stamp             | 08 Apr 2017 14:12:32 |              |       | File Name            | C:\Users\Luiz\Desktop\Luiz\PhD\NMR\17-4-abr\abr08\ftH1\2\IPDATA\1\1r |                   |          |
| Frequency (MHz)        | 62.90                | Nucleus      | 13C   | Number of Transients | 274                                                                  | Origin            | spect    |
| Owner                  | root                 | Points Count | 32768 | Pulse Sequence       | zgpg30                                                               | Receiver Gain     | 574.70   |
| Solvent                | CHLOROFORM-d         |              |       | Spectrum Offset (Hz) | 6289.0518                                                            | Spectrum Type     | STANDARD |
| Temperature (degree C) | 25.260               |              |       |                      |                                                                      | SW(cyclical) (Hz) | 15060.24 |
|                        |                      |              |       |                      |                                                                      | Sweep Width (Hz)  | 15059.78 |

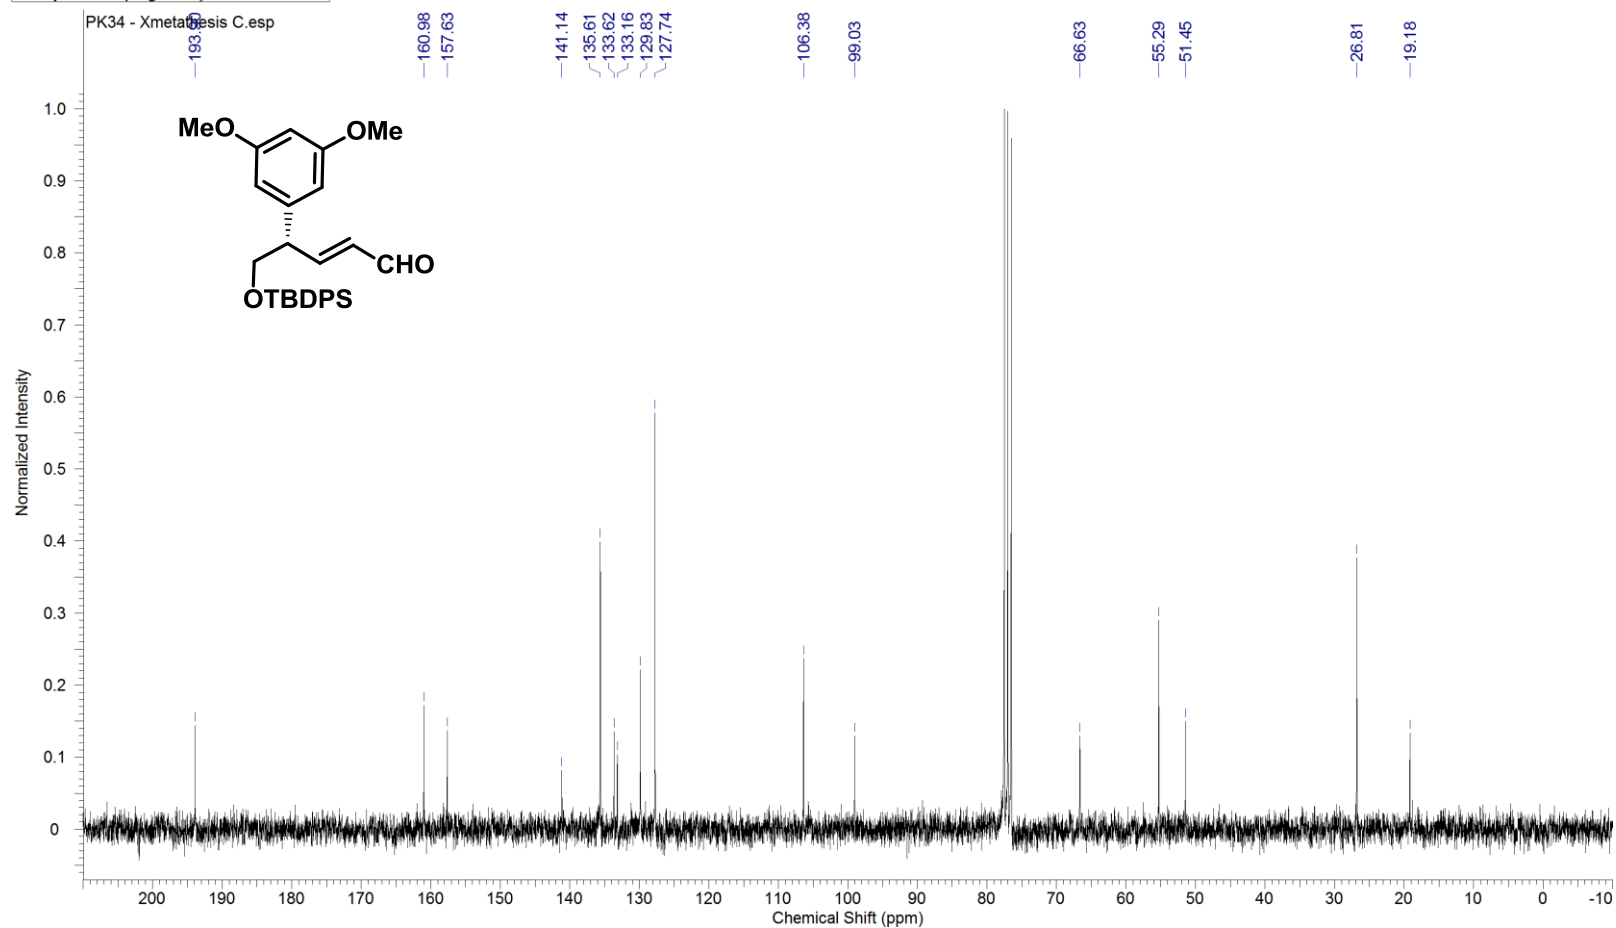

**Figure S55.**  $^{13}\text{C}$  NMR spectrum ( $\text{CDCl}_3$ , 62.9 MHz) of compound **20**.

|                        |                                                                                                      |                      |              |                |                      |                       |                        |           |
|------------------------|------------------------------------------------------------------------------------------------------|----------------------|--------------|----------------|----------------------|-----------------------|------------------------|-----------|
| Acquisition Time (sec) | 0.5439                                                                                               | Comment              | LN518        | Date           | 08 Apr 2017 14:27:28 |                       |                        |           |
| Date Stamp             | 08 Apr 2017 14:27:28                                                                                 |                      |              |                |                      |                       |                        |           |
| File Name              | \\nmrparc.lqm.unicamp.br\spectros\bruker250\2017\abr17\data\Julio Pastre\nmr\abr08\ftH1\3\PDATA\1\1r |                      |              |                | Frequency (MHz)      | 62.90                 |                        |           |
| Nucleus                | <sup>13</sup> C                                                                                      | Number of Transients | 170          | Origin         | spect                | Original Points Count | 8192                   |           |
| Owner                  | root                                                                                                 | Points Count         | 32768        | Pulse Sequence | dept135              | Receiver Gain         | 4597.60                |           |
| SW(cyclical) (Hz)      | 15060.24                                                                                             | Solvent              | CHLOROFORM-d |                |                      |                       | Spectrum Offset (Hz)   | 6289.0518 |
| Spectrum Type          | DEPT135                                                                                              | Sweep Width (Hz)     | 15059.78     |                |                      |                       | Temperature (degree C) | 25.160    |

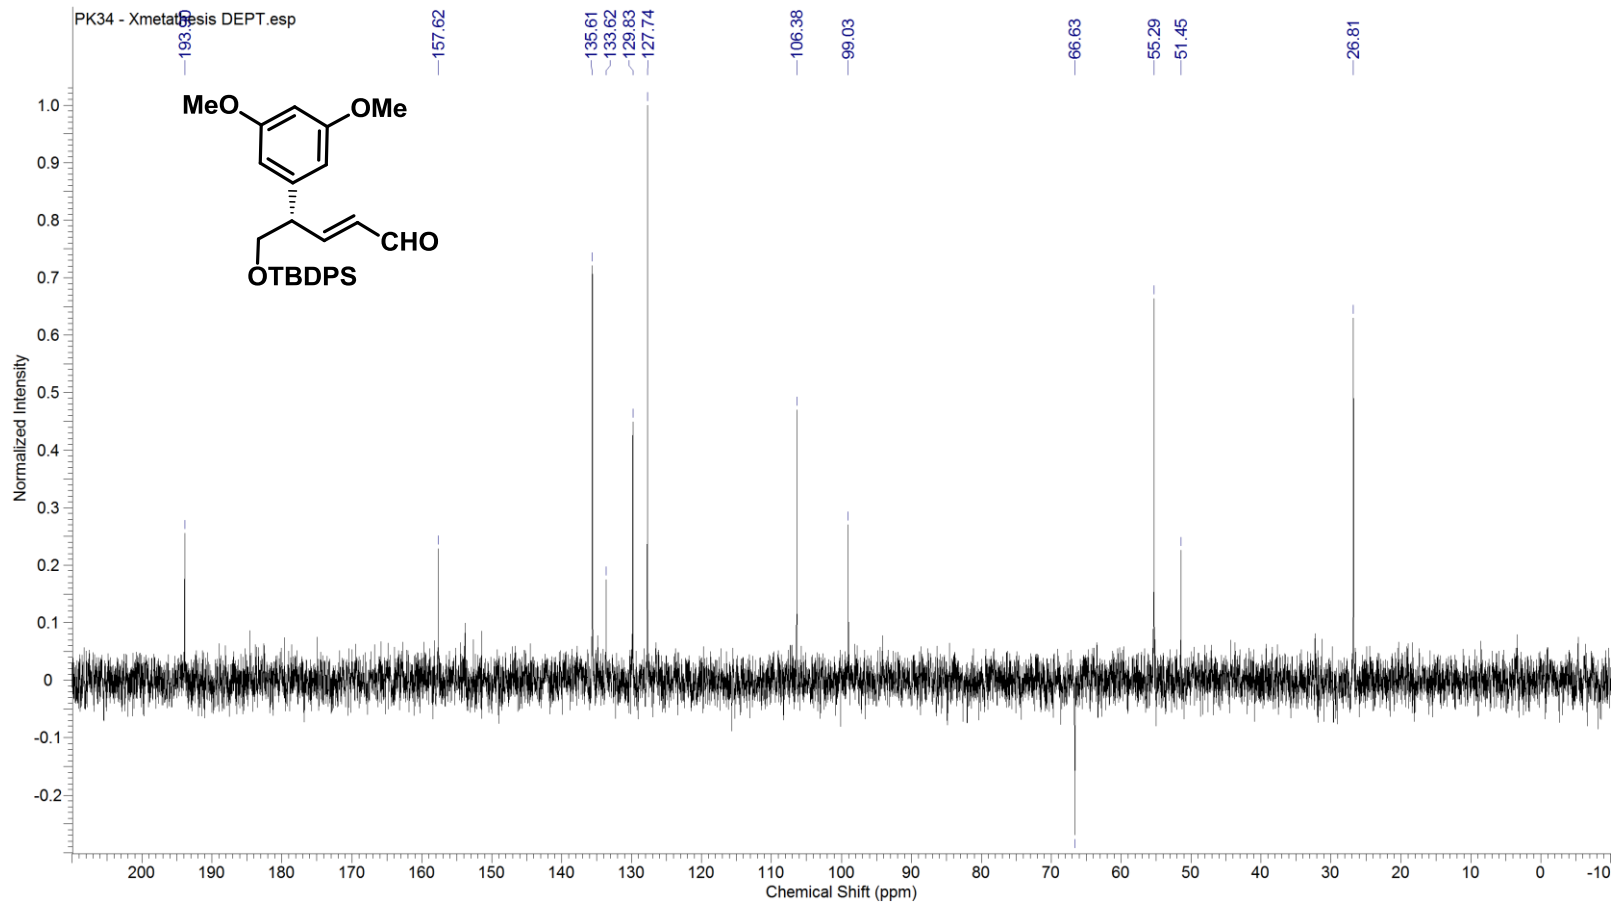

**Figure S56.** DEPT 135 NMR spectrum ( $\text{CDCl}_3$ , 62.9 MHz) of compound **20**.

(*S*)-tert-butyl((5,7-dimethoxy-1,2-dihydronaphthalen-1-yl)methoxy)diphenylsilane (**21**).

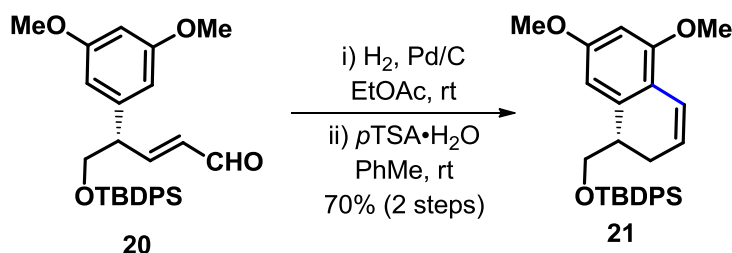

Pd/C (5% w/w, 5.6 mg, 2.6  $\mu\text{mol}$ , 5 mol %) was added to a solution of enal **20** (25.2 mg, 53.0  $\mu\text{mol}$ , 1 equiv) in EtOAc (5 mL) at room temperature. This mixture was purged with  $\text{H}_2$  and was stirred for 2 h. Next, the reaction contents were directly filtered through a plug of silica using EtOAc as eluent to furnish the saturated aldehyde, which was used in the next step without further purification.

**TLC** ( $\text{SiO}_2$ ):  $R_f = 0.60$  (hexanes/EtOAc 75:25).

The saturated aldehyde obtained above was diluted in dry toluene (2.5 mL), and  $p\text{TSA}\cdot\text{H}_2\text{O}$  (9.2 mg, 53  $\mu\text{mol}$ , 1 equiv) was added to the reaction at room temperature. The mixture was stirred for 1 h, then saturated aqueous solution of  $\text{NaHCO}_3$  (5 mL) and EtOAc (15 mL) were added. The organic phase was separated, washed with brine (5 mL), dried over anhydrous  $\text{Na}_2\text{SO}_4$ , and concentrated under reduced pressure. The residue was subjected to flash chromatography ( $\text{SiO}_2$ , hexanes/EtOAc 95: 5 to 90:10) to give the bicycle **21** (17.0 mg, 37.1  $\mu\text{mol}$ ) as a colorless oil in 70% yield.

**TLC** ( $\text{SiO}_2$ ):  $R_f = 0.40$  (hexanes/EtOAc 90:10);

$[\alpha]_D^{25} = +5$  ( $c$  1.0,  $\text{CHCl}_3$ );

**IR** (ATR,  $\text{cm}^{-1}$ ): 2955, 2926, 2857, 1726, 1605, 1579, 1465, 1428, 1270, 1151, 1087, 830, 704, 616;

**$^1\text{H}$  NMR** (250 MHz,  $\text{CDCl}_3$ ):  $\delta$  1.10 (s, 9H), 2.35-2.69 (m, 2H), 2.83-2.97 (m, 1H), 3.75 (s, 3H), 3.57-3.77 (m, 2H), 3.80 (s, 3H), 5.64-5.75 (m, 1H), 6.21 (d,  $J = 2.0$  Hz, 1H), 6.31 (d,  $J = 2.0$  Hz, 1H), 6.68 (dd,  $J = 9.8, 2.7$  Hz, 1H), 7.32-7.48 (m, 6H), 7.59-7.70 (4H);

**$^{13}\text{C}$  NMR** (62.9 MHz,  $\text{CDCl}_3$ ):  $\delta$  19.3 (C), 24.4 ( $\text{CH}_2$ ), 26.9 ( $3\text{CH}_3$ ), 40.8 (CH), 55.3 ( $\text{CH}_3$ ), 55.5 ( $\text{CH}_3$ ), 67.1 ( $\text{CH}_2$ ), 96.9 (CH), 105.5 (CH), 116.1 (C), 120.5 (CH), 122.5 (CH), 127.6 (4CH), 129.5 (2CH), 133.8 (C), 133.9 (C), 135.7 (4CH), 138.1 (C), 155.8 (C), 159.3 (C);

**HRMS** (ESI +):  $m/z$  calculated for  $\text{C}_{29}\text{H}_{34}\text{O}_3\text{SiNa}^+$   $[\text{M}+\text{Na}]^+$  481.2169, found 481.2153.



|                        |                      |              |       |                      |                                                                 |                   |          |
|------------------------|----------------------|--------------|-------|----------------------|-----------------------------------------------------------------|-------------------|----------|
| Acquisition Time (sec) | 1.0879               | Comment      | LN454 | Date                 | 16 Feb 2017 17:14:08                                            |                   |          |
| Date Stamp             | 16 Feb 2017 17:14:08 |              |       | File Name            | C:\Users\Luiz\Desktop\Luiz\PhD\NMR\17-2-fev\16ftH3\2\PDATA\1\1r |                   |          |
| Frequency (MHz)        | 62.90                | Nucleus      | 13C   | Number of Transients | 54                                                              | Origin            | spect    |
| Owner                  | root                 | Points Count | 32768 | Pulse Sequence       | zgpg30                                                          | Receiver Gain     | 574.70   |
| Solvent                | CHLOROFORM-d         |              |       | Spectrum Offset (Hz) | 6289.0518                                                       | Spectrum Type     | STANDARD |
| Temperature (degree C) | 25.160               |              |       |                      |                                                                 | SW(cyclical) (Hz) | 15060.24 |
|                        |                      |              |       |                      |                                                                 | Sweep Width (Hz)  | 15059.78 |

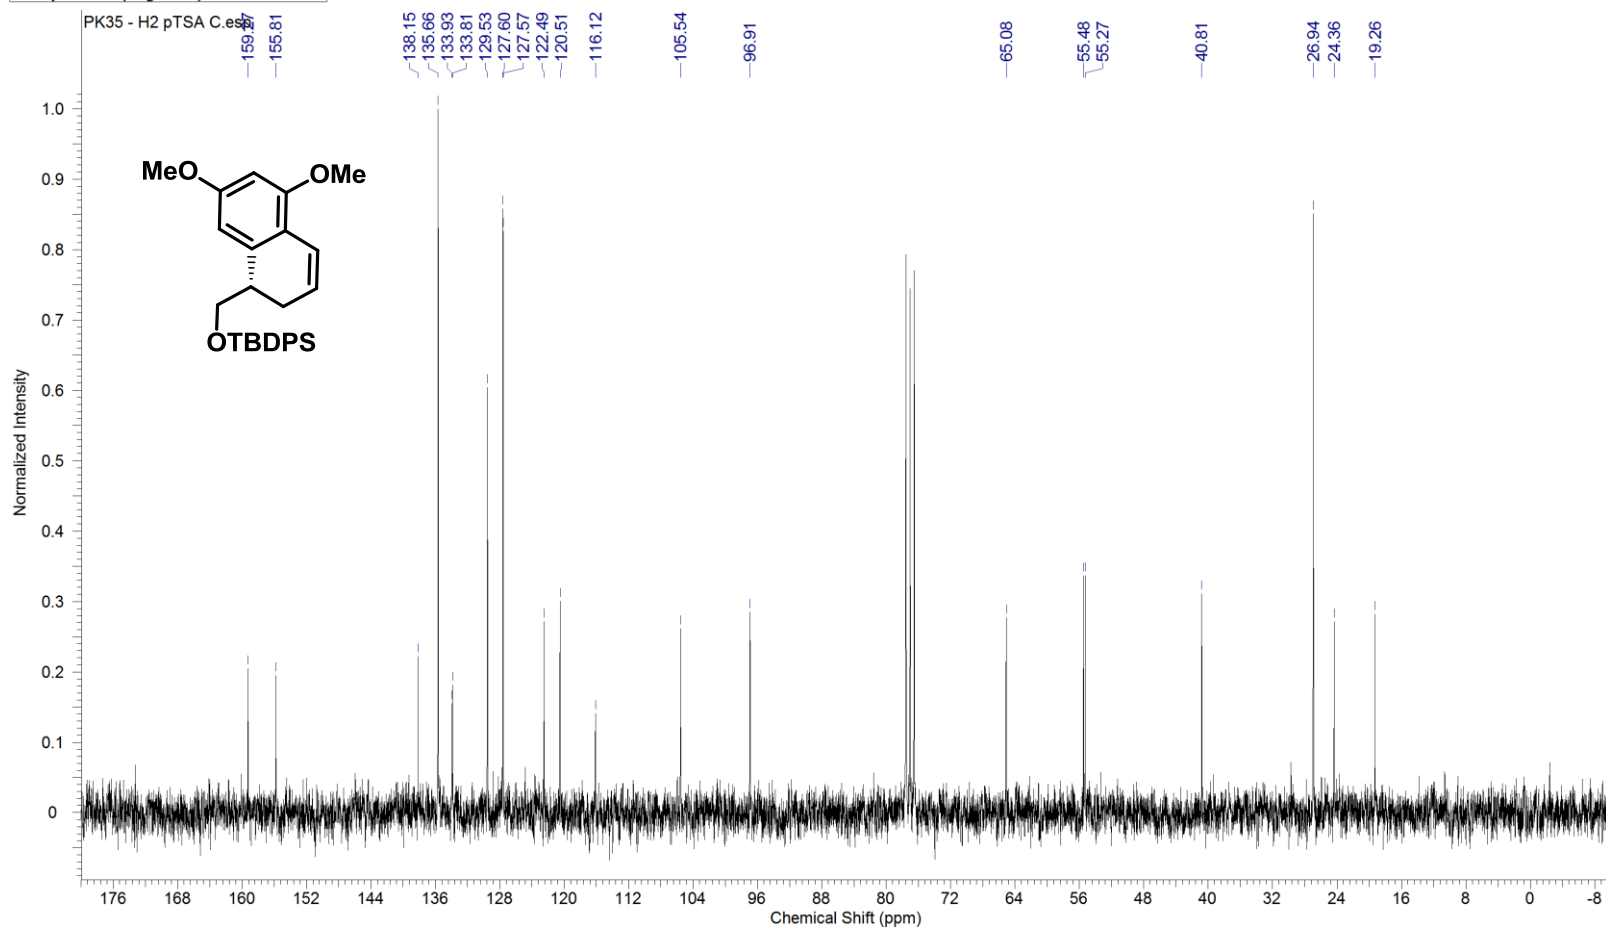

**Figure S58.**  $^{13}\text{C}$  NMR spectrum ( $\text{CDCl}_3$ , 62.9 MHz) of compound **21**.

|                        |                      |              |       |                      |                                                                     |                            |
|------------------------|----------------------|--------------|-------|----------------------|---------------------------------------------------------------------|----------------------------|
| Acquisition Time (sec) | 0.5439               | Comment      | LN454 | Date                 | 16 Feb 2017 17:16:16                                                |                            |
| Date Stamp             | 16 Feb 2017 17:16:16 |              |       | File Name            | C:\Users\Luiz\Desktop\Luiz\PhD\NMR\17-2-fev\fev16\ftH3\3\PDATA\1\1r |                            |
| Frequency (MHz)        | 62.90                | Nucleus      | 13C   | Number of Transients | 23                                                                  | Origin spect               |
| Owner                  | root                 | Points Count | 32768 | Pulse Sequence       | dept135                                                             | Receiver Gain 1290.20      |
| Solvent                | CHLOROFORM-d         |              |       | Spectrum Offset (Hz) | 6289.0518                                                           | Spectrum Type DEPT135      |
| Temperature (degree C) | 25.160               |              |       |                      |                                                                     | SW(cyclical) (Hz) 15060.24 |
|                        |                      |              |       |                      |                                                                     | Sweep Width (Hz) 15059.78  |

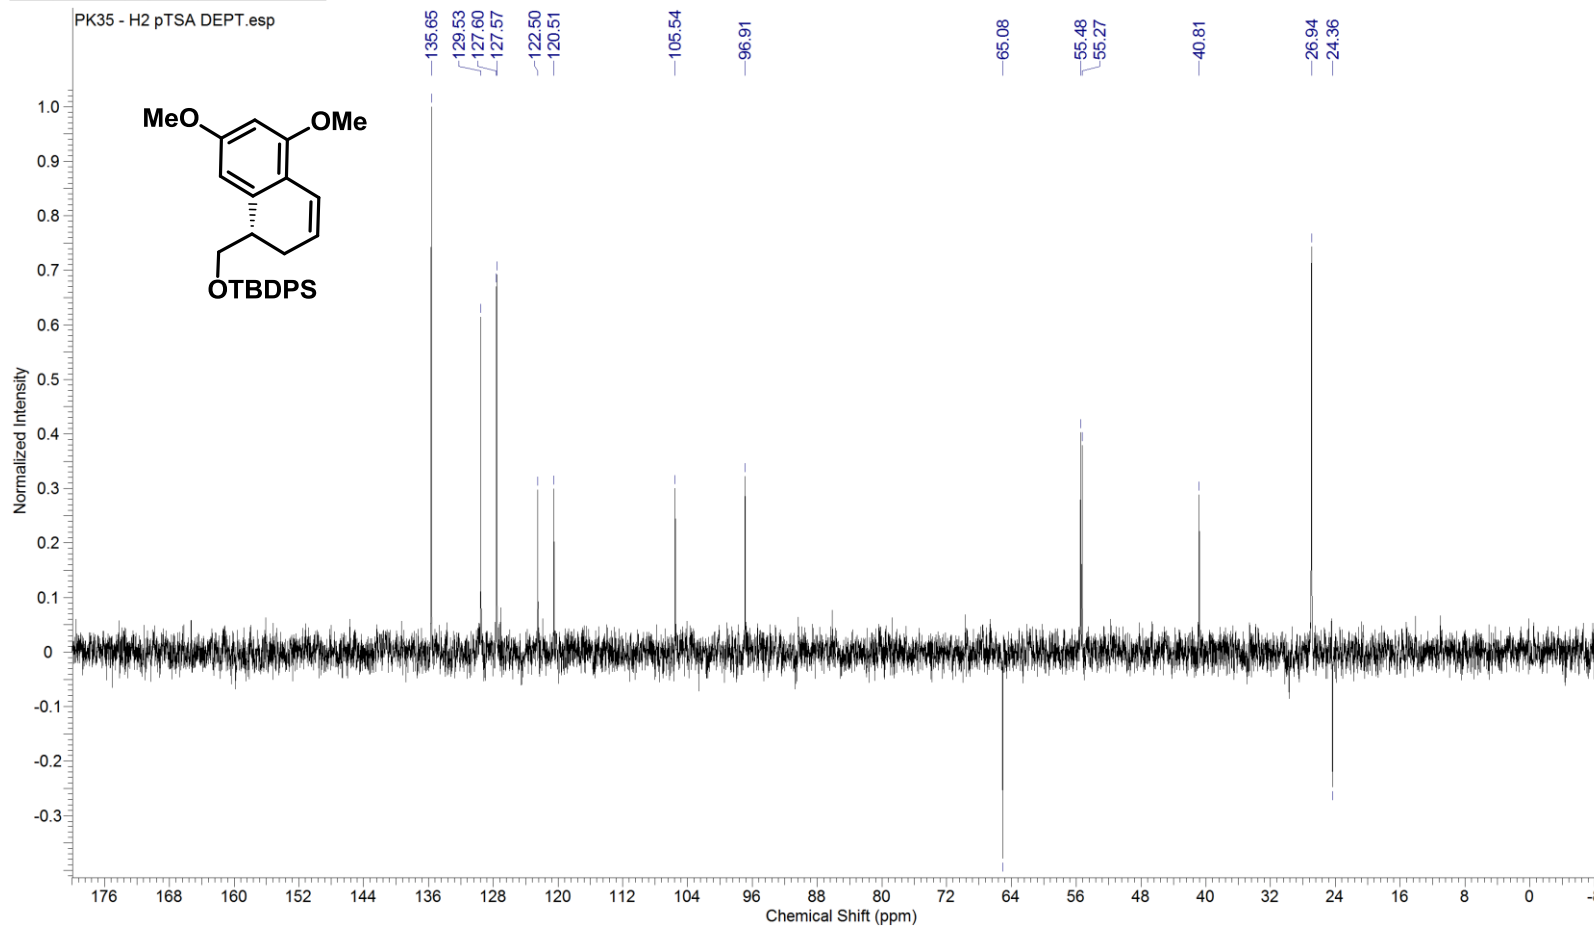

**Figure S59.** DEPT 135 NMR spectrum ( $\text{CDCl}_3$ , 62.9 MHz) of compound **21**.

(*S*)-tert-butyl((5,7-dimethoxy-1,2,3,4-tetrahydronaphthalen-1-yl)methoxy)diphenylsilane (**SI-2**).

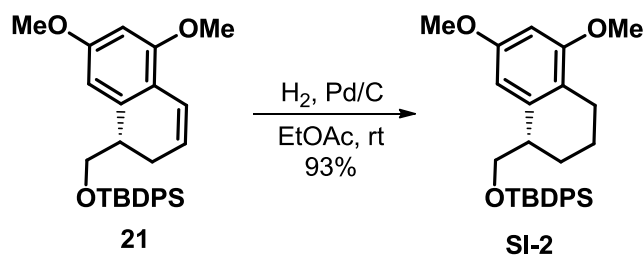

Pd/C (5% w/w, 72 mg, 34  $\mu$ mol, 5 mol %) was added to a solution of alkene **21** (312 mg, 0.68 mmol, 1 equiv) in EtOAc (34 mL) at room temperature. This mixture was purged with H<sub>2</sub> and was stirred for 14 h. Next, the solvent was removed under reduced pressure, and the residue was subjected to flash chromatography (SiO<sub>2</sub>, hexanes:EtOAc, 90:10) to afford the tetraline **SI-2** (290 mg, 0.63 mmol) as a colorless oil in 93% yield.

**TLC** (SiO<sub>2</sub>): R<sub>f</sub> = 0.44 (hexanes/EtOAc 90:10);

[ $\alpha$ ]<sub>D</sub><sup>25</sup> = -20 (*c* 1.0, CHCl<sub>3</sub>);

**IR** (ATR, cm<sup>-1</sup>): 2933, 2859, 1609, 1594, 1465, 1430, 1203, 1147, 1115, 1087, 826, 705;

**<sup>1</sup>H NMR** (250 MHz, CDCl<sub>3</sub>):  $\delta$  1.11 (s, 9H), 1.62-1.85 (m, 3H), 2.01-2.18 (m, 1H), 2.36-2.53 (m, 1H), 2.62 (dt, *J* = 17.4, 4.9 Hz, 1H), 2.87-3.01 (m, 1H), 3.69 (s, 3H), 3.78 (s, 3H), 3.70-3.89 (m, 2H), 6.16 (d, *J* = 2.2 Hz, 1H), 6.29 (d, *J* = 2.2 Hz, 1H), 7.33-7.48 (m, 6H), 7.63-7.76 (4H);

**<sup>13</sup>C NMR** (62.9 MHz, CDCl<sub>3</sub>):  $\delta$  18.5 (CH<sub>2</sub>), 19.3 (C), 22.6 (CH<sub>2</sub>), 24.3 (CH<sub>2</sub>), 26.9 (3CH<sub>3</sub>), 41.0 (CH), 55.2 (2CH<sub>3</sub>), 67.9 (CH<sub>2</sub>), 96.2 (CH), 104.7 (CH), 119.2 (C), 127.6 (4CH), 129.6 (2CH), 133.8 (C), 134.0 (C), 135.65 (2CH), 135.69 (2CH), 138.9 (C), 158.0 (2C);

**HRMS** (ESI +): *m/z* calculated for C<sub>29</sub>H<sub>36</sub>O<sub>3</sub>SiNa<sup>+</sup> [M+Na]<sup>+</sup> 483.2326, found 483.2321.

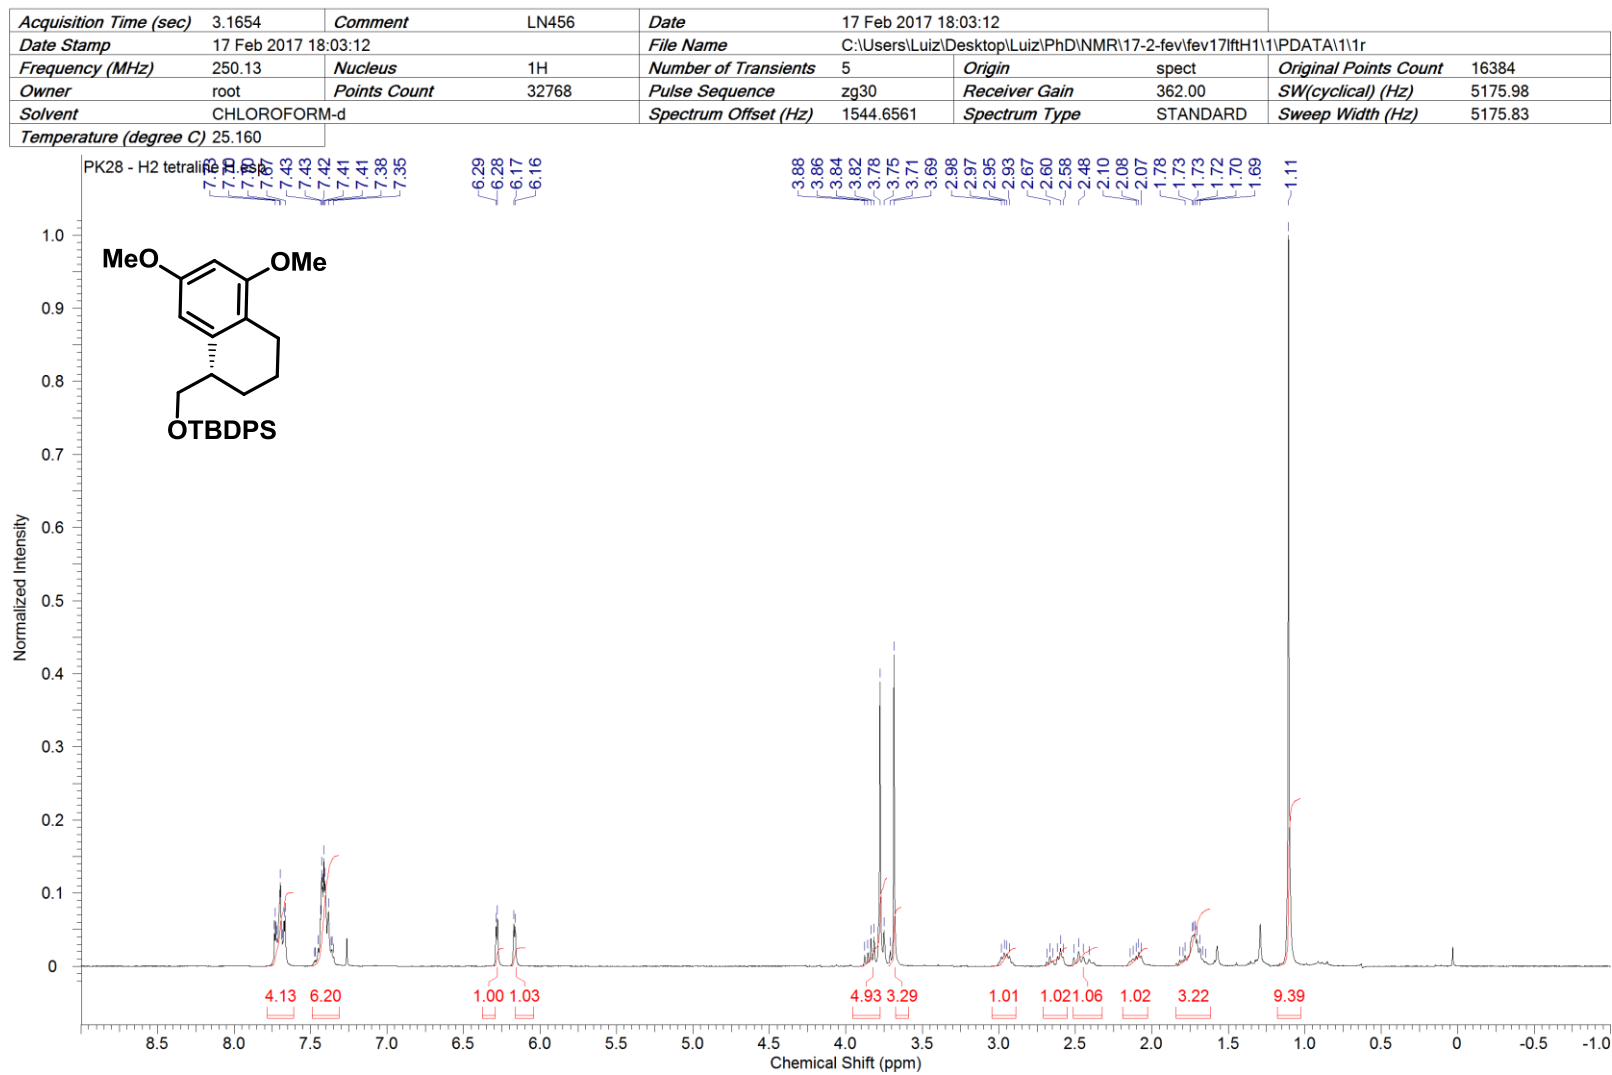

**Figure S60.**  $^1\text{H}$  NMR spectrum ( $\text{CDCl}_3$ , 250 MHz) of compound **SI-2**.



|                        |                      |              |       |                      |                                                                 |                   |          |
|------------------------|----------------------|--------------|-------|----------------------|-----------------------------------------------------------------|-------------------|----------|
| Acquisition Time (sec) | 1.0879               | Comment      | LN456 | Date                 | 17 Feb 2017 18:05:20                                            |                   |          |
| Date Stamp             | 17 Feb 2017 18:05:20 |              |       | File Name            | C:\Users\Luiz\Desktop\Luiz\PhD\NMR\17-2-fev\171ft\12\PDATA\1\1r |                   |          |
| Frequency (MHz)        | 62.90                | Nucleus      | 13C   | Number of Transients | 64                                                              | Origin            | spect    |
| Owner                  | root                 | Points Count | 32768 | Pulse Sequence       | zgpg30                                                          | Receiver Gain     | 645.10   |
| Solvent                | CHLOROFORM-d         |              |       | Spectrum Offset (Hz) | 6289.0518                                                       | Spectrum Type     | STANDARD |
| Temperature (degree C) | 25.160               |              |       |                      |                                                                 | SW(cyclical) (Hz) | 15060.24 |
|                        |                      |              |       |                      |                                                                 | Sweep Width (Hz)  | 15059.78 |

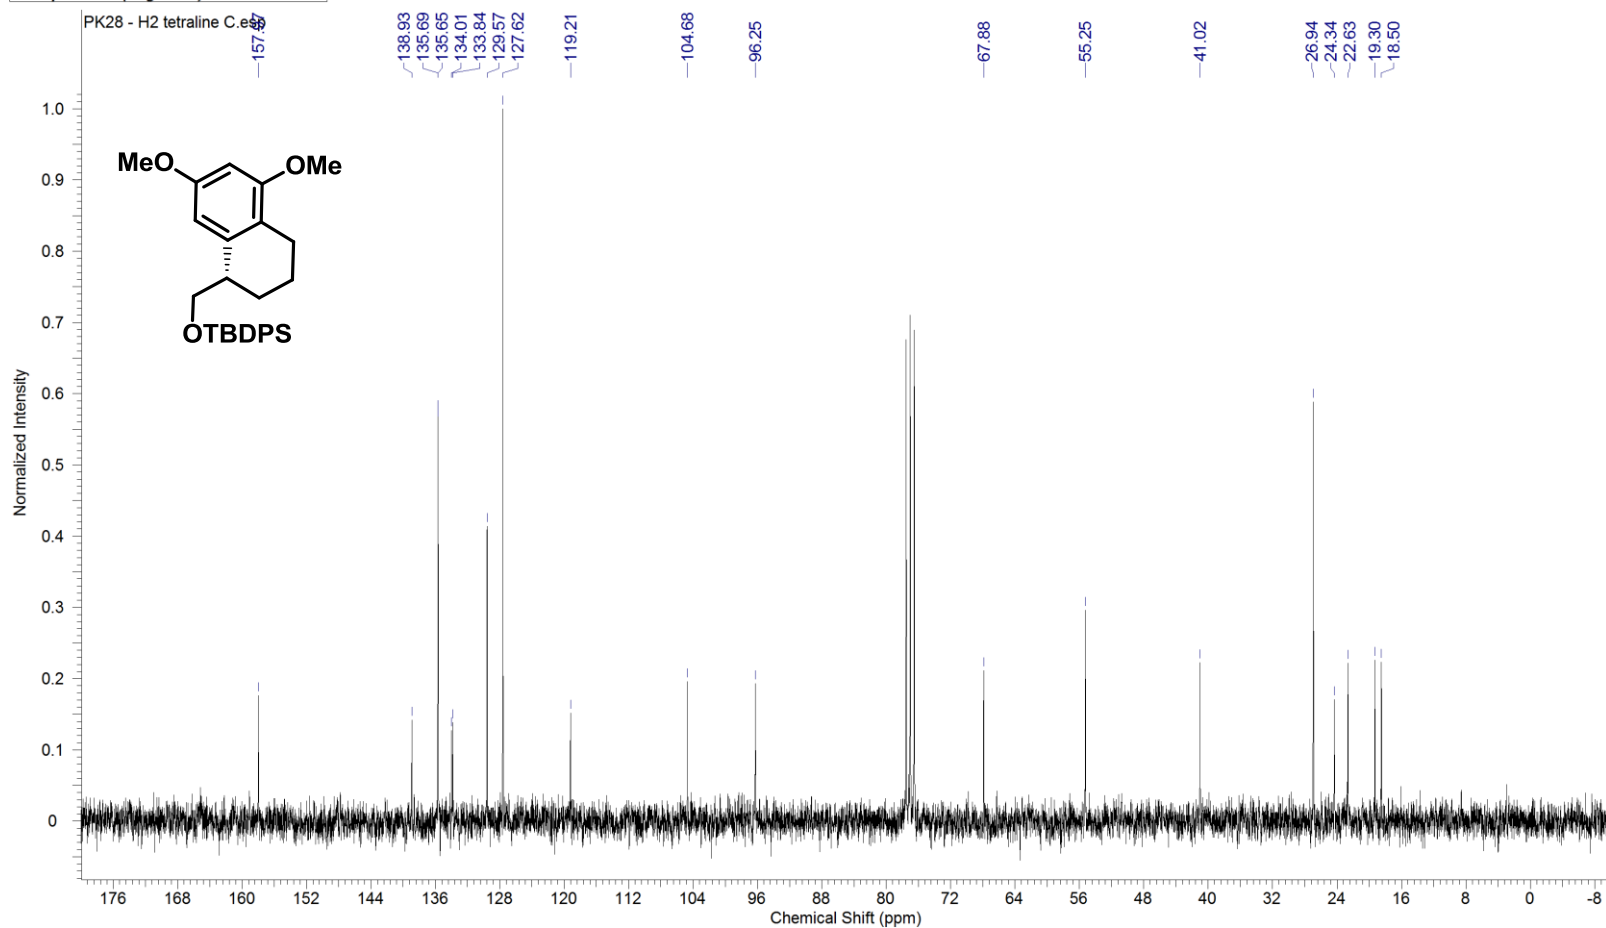

**Figure S61.**  $^{13}\text{C}$  NMR spectrum ( $\text{CDCl}_3$ , 62.9 MHz) of compound **SI-2**.

|                        |                      |              |       |                      |                                                                    |                   |          |
|------------------------|----------------------|--------------|-------|----------------------|--------------------------------------------------------------------|-------------------|----------|
| Acquisition Time (sec) | 0.5439               | Comment      | LN456 | Date                 | 17 Feb 2017 18:09:36                                               |                   |          |
| Date Stamp             | 17 Feb 2017 18:09:36 |              |       | File Name            | C:\Users\Luiz\Desktop\Luiz\PhD\NMR\17-2-fev\fev17\ftH1\3\PDATA\11r |                   |          |
| Frequency (MHz)        | 62.90                | Nucleus      | 13C   | Number of Transients | 28                                                                 | Origin            | spect    |
| Owner                  | root                 | Points Count | 32768 | Pulse Sequence       | dept135                                                            | Receiver Gain     | 1448.20  |
| Solvent                | CHLOROFORM-d         |              |       | Spectrum Offset (Hz) | 6289.0518                                                          | Spectrum Type     | DEPT135  |
| Temperature (degree C) | 25.160               |              |       |                      |                                                                    | SW(cyclical) (Hz) | 15060.24 |
|                        |                      |              |       |                      |                                                                    | Sweep Width (Hz)  | 15059.78 |

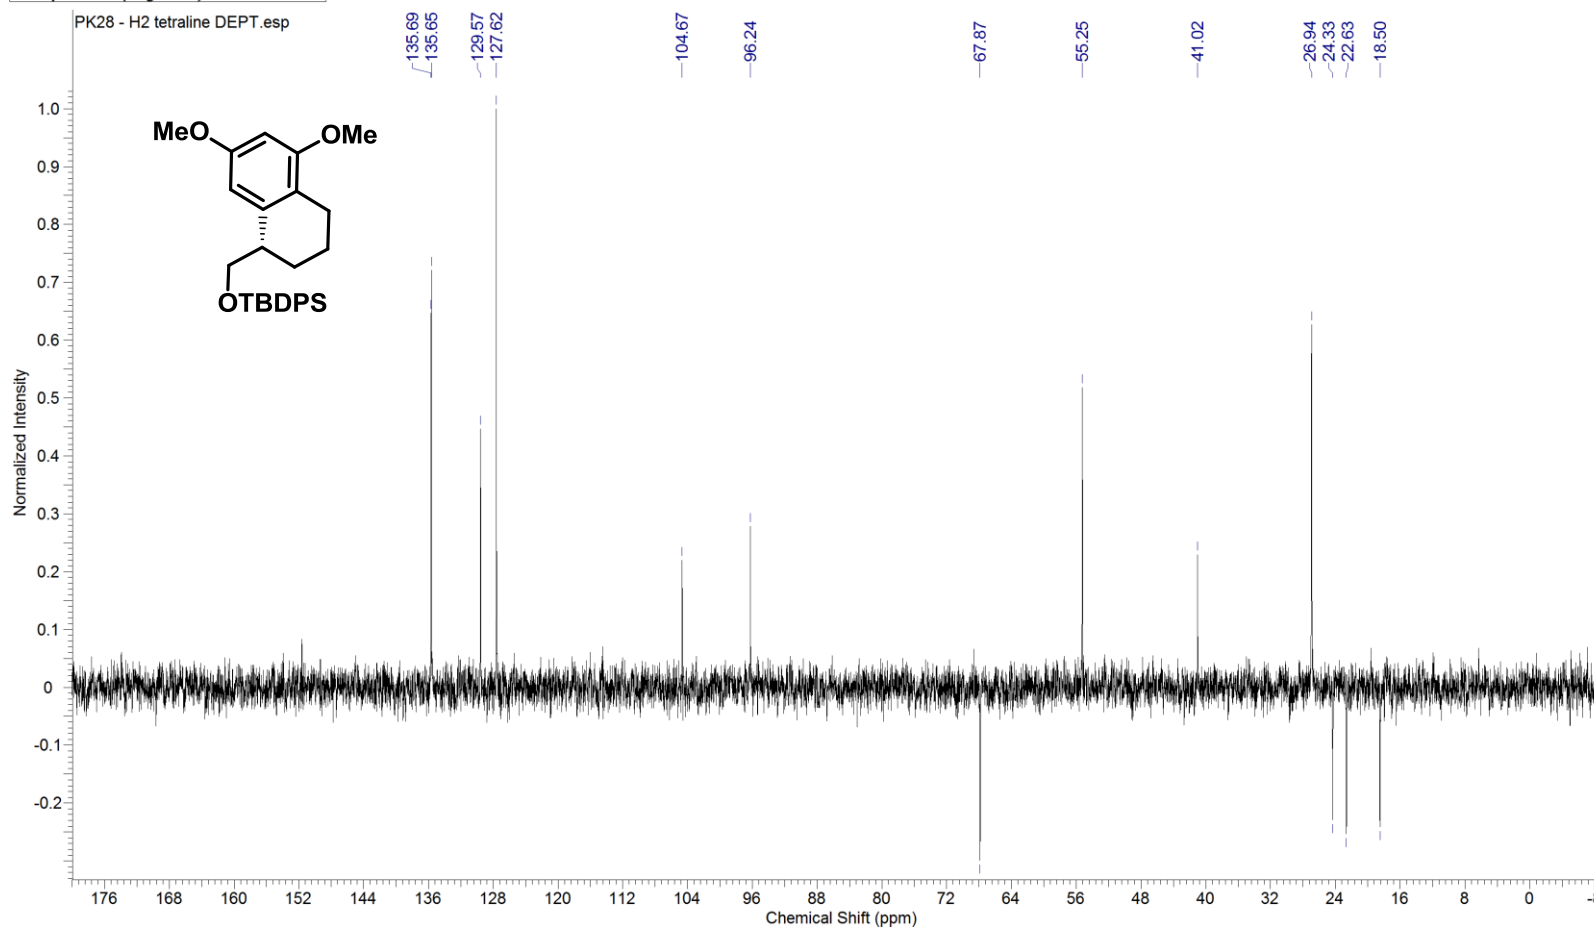

**Figure S62.** DEPT 135 NMR spectrum ( $\text{CDCl}_3$ , 62.9 MHz) of compound **SI-2**.

**(S)-(5,7-dimethoxy-1,2,3,4-tetrahydronaphthalen-1-yl)methanol (**5**).**

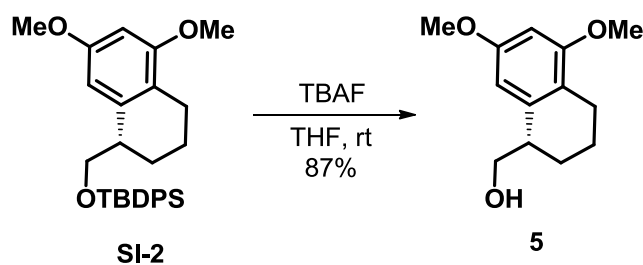

TBAF solution (1 M in THF, 1.4 mL, 1.4 mmol, 2 equiv) was added to a mixture of silyl ether **SI-2** (322 mg, 0.70 mmol, 1 equiv) in dry THF (14 mL) at room temperature. This mixture was stirred for 2 h, then was quenched by addition of saturated aqueous solution of  $\text{NH}_4\text{Cl}$  (30 mL). The mixture was extracted with EtOAc (2 x 30 mL). The organic phases were combined, dried over anhydrous  $\text{MgSO}_4$ , and concentrated under reduced pressure. The residue was subjected to flash chromatography ( $\text{SiO}_2$ , hexanes/EtOAc 85:15 to 75:25) to furnish alcohol **5** (135 mg, 0.61 mmol) as a colorless oil in 87% yield.

**TLC ( $\text{SiO}_2$ ):**  $R_f = 0.27$  (hexanes/EtOAc 75:25);

$[\alpha]_{\text{D}}^{25} = -2$  ( $c$  1.0,  $\text{CHCl}_3$ ), for *ent*-**5**  $[\alpha]_{\text{D},\text{lit}}^{20} = +3.5$  ( $c$  1.0,  $\text{CHCl}_3$ );<sup>6</sup>

**$^1\text{H}$  NMR** (250 MHz,  $\text{CDCl}_3$ ):  $\delta$  1.59 (br. s, 1H), 1.68-1.98 (m, 4H), 2.42-2.70 (m, 2H), 2.93 (quint,  $J = 5.3$  Hz, 1H), 3.79 (s, 6H), 3.77-3.84 (m, 2H), 6.32 (d,  $J = 2.2$  Hz, 1H), 6.39 (d,  $J = 2.2$  Hz, 1H);

**$^{13}\text{C}$  NMR** (62.9 MHz,  $\text{CDCl}_3$ ):  $\delta$  19.1 ( $\text{CH}_2$ ), 22.6 ( $\text{CH}_2$ ), 24.9 ( $\text{CH}_2$ ), 40.8 (CH), 55.3 ( $2\text{CH}_3$ ), 67.0 ( $\text{CH}_2$ ), 96.2 (CH), 104.2 (CH), 119.4 (C), 138.4 (C), 158.3 (2C).



|                        |                      |              |       |                      |                                                                    |               |          |                       |          |
|------------------------|----------------------|--------------|-------|----------------------|--------------------------------------------------------------------|---------------|----------|-----------------------|----------|
| Acquisition Time (sec) | 1.0879               | Comment      | LN493 | Date                 | 14 Mar 2017 16:46:08                                               |               |          |                       |          |
| Date Stamp             | 14 Mar 2017 16:46:08 |              |       | File Name            | C:\Users\Luiz\Desktop\Luiz\PhD\NMR\17-3-mar\mar14\ftH1\2\pdata\11r |               |          |                       |          |
| Frequency (MHz)        | 62.90                | Nucleus      | 13C   | Number of Transients | 100                                                                | Origin        | spect    | Original Points Count | 16384    |
| Owner                  | root                 | Points Count | 32768 | Pulse Sequence       | zgpg30                                                             | Receiver Gain | 812.70   | SW(cyclical) (Hz)     | 15060.24 |
| Solvent                | CHLOROFORM-d         |              |       | Spectrum Offset (Hz) | 6289.0518                                                          | Spectrum Type | STANDARD | Sweep Width (Hz)      | 15059.78 |
| Temperature (degree C) | 25.260               |              |       |                      |                                                                    |               |          |                       |          |

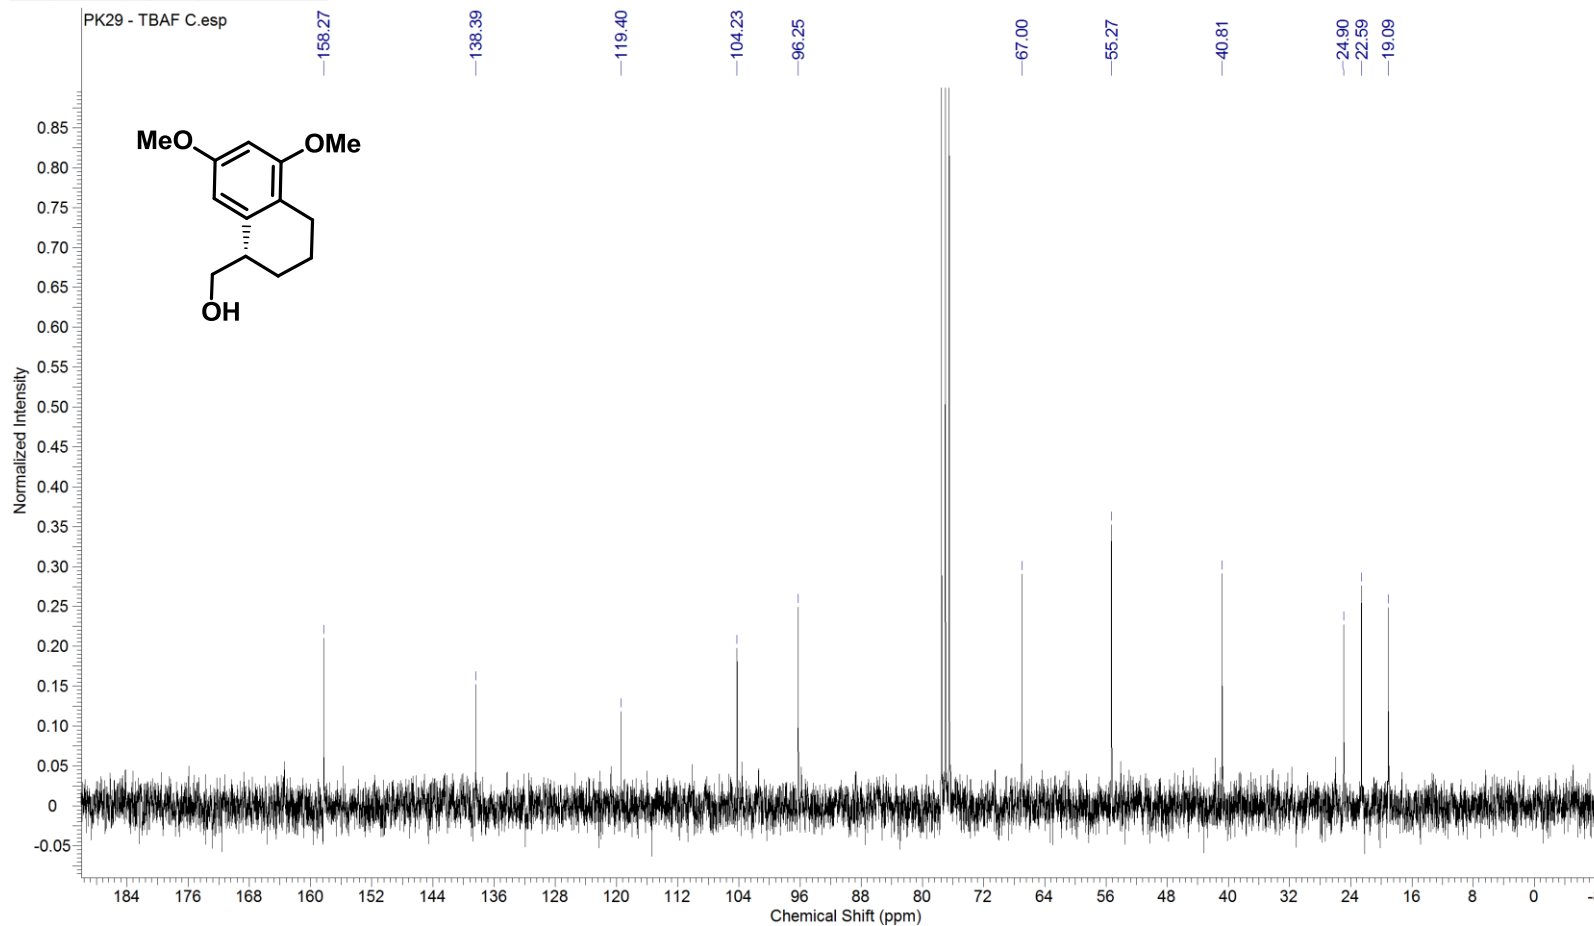

**Figure S64.**  $^{13}\text{C}$  NMR spectrum ( $\text{CDCl}_3$ , 62.9 MHz) of compound **5**.

|                        |                      |              |       |                      |                                                                     |                   |          |
|------------------------|----------------------|--------------|-------|----------------------|---------------------------------------------------------------------|-------------------|----------|
| Acquisition Time (sec) | 0.5439               | Comment      | LN493 | Date                 | 14 Mar 2017 16:50:24                                                |                   |          |
| Date Stamp             | 14 Mar 2017 16:50:24 |              |       | File Name            | C:\Users\Luiz\Desktop\Luiz\PhD\NMR\17-3-mar\mar14\ftH1\3\PDATA\1\1r |                   |          |
| Frequency (MHz)        | 62.90                | Nucleus      | 13C   | Number of Transients | 50                                                                  | Origin            | spect    |
| Owner                  | root                 | Points Count | 32768 | Pulse Sequence       | dept135                                                             | Receiver Gain     | 1448.20  |
| Solvent                | CHLOROFORM-d         |              |       | Spectrum Offset (Hz) | 6289.0518                                                           | Spectrum Type     | DEPT135  |
| Temperature (degree C) | 25.160               |              |       |                      |                                                                     | SW(cyclical) (Hz) | 15060.24 |
|                        |                      |              |       |                      |                                                                     | Sweep Width (Hz)  | 15059.78 |

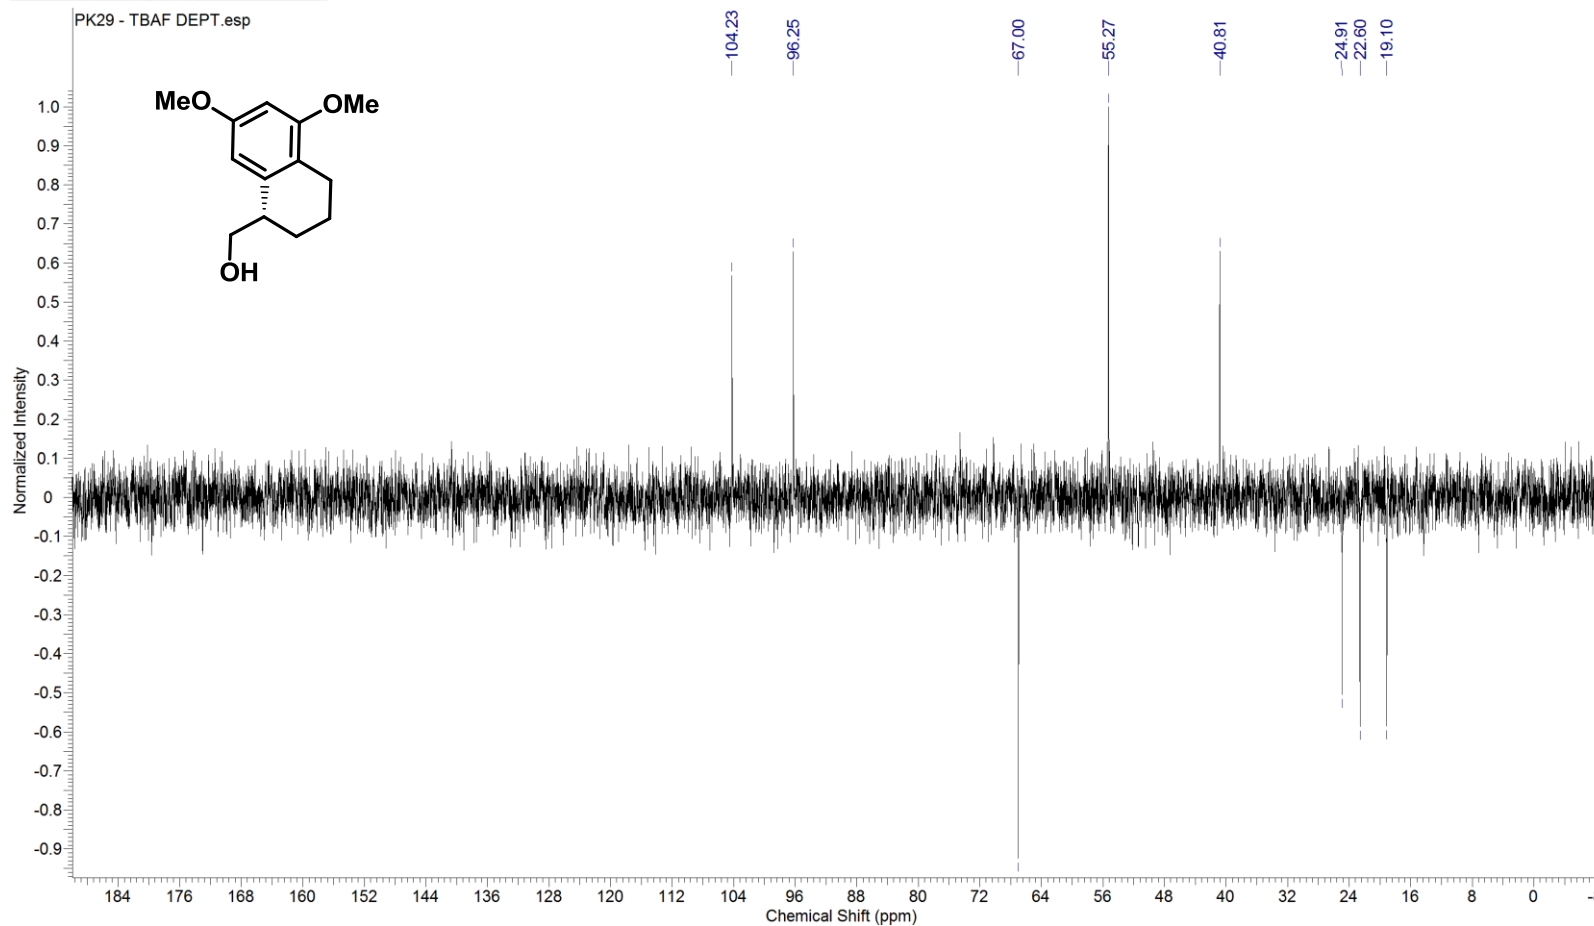

**Figure S65.** DEPT 135 NMR spectrum ( $\text{CDCl}_3$ , 62.9 MHz) of compound **5**.

**Table 2.** Comparison between  $^{13}\text{C}$  NMR spectra of compound **5** and reported by Xu and Ye<sup>5</sup>

| <b>Pastre (this work)</b>     | <b>Xu and Ye<sup>5</sup></b> | <b><math>\Delta\delta</math></b> |
|-------------------------------|------------------------------|----------------------------------|
| <b>19.1</b>                   | 19.1                         | 0.0                              |
| <b>22.6</b>                   | 22.6                         | 0.0                              |
| <b>24.9</b>                   | 25.0                         | −0.1                             |
| <b>40.8</b>                   | 40.9                         | −0.1                             |
| <b>55.3 (2CH<sub>3</sub>)</b> | 55.3 (2CH <sub>3</sub> )     | 0.0                              |
| <b>67.0</b>                   | 67.0                         | 0.0                              |
| <b>96.2</b>                   | 96.3                         | −0.1                             |
| <b>104.2</b>                  | 104.3                        | −0.1                             |
| <b>119.4</b>                  | 119.4                        | 0.0                              |
| <b>138.4</b>                  | 138.4                        | 0.0                              |
| <b>158.3 (2C)</b>             | 158.3 (2C)                   | 0.0                              |

(*S,E*)-1-((*S*)-5,7-dimethoxy-1,2,3,4-tetrahydronaphthalen-1-yl)-3-methyl-5-((1*S*,4*aS*,8*aS*)-2,5,5,8*a*-tetramethyl-1,4,4*a*,5,6,7,8,8*a*-octahydronaphthalen-1-yl)pent-2-en-1-ol (**23**).

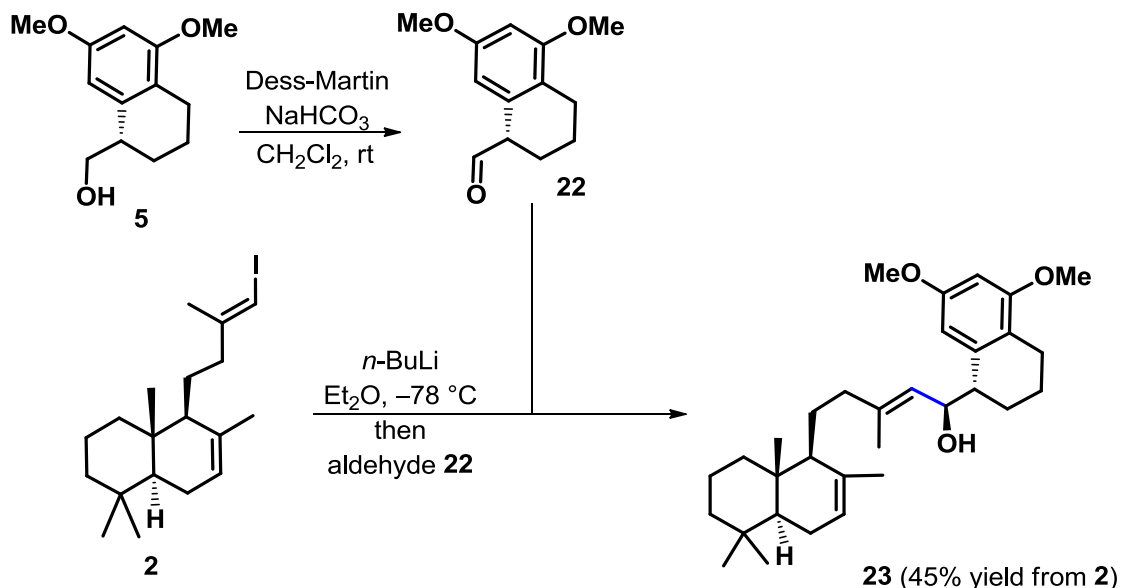

Solid  $\text{NaHCO}_3$  (23.0 mg, 0.27 mmol, 2.2 equiv) and Dess-Martin periodinane (79.1 mg, 0.19 mmol, 1.5 equiv) were added to a solution of alcohol **5** (41.4 mg, 0.19 mmol, 1.5 equiv) in dry  $\text{CH}_2\text{Cl}_2$  (5 mL) at room temperature. This mixture was stirred for 1 h, then the solvent was removed under reduced pressure, and the aldehyde was purified by flash chromatography ( $\text{SiO}_2$ , hexanes/ $\text{EtOAc}$  90:10) to furnish aldehyde **22**, which was immediately used in the next step.

**TLC** ( $\text{SiO}_2$ ):  $R_f$  = 0.60 (hexanes/ $\text{EtOAc}$  75:25);

$n\text{-BuLi}$  solution (2.14 M in hexanes, 118  $\mu\text{L}$ , 0.25 mmol, 2 equiv) was added dropwisely to a solution of iodide **2** (48.0 mg, 0.12 mmol, 1 equiv) in  $\text{Et}_2\text{O}$  (2 mL) at  $-78^\circ\text{C}$ , the resulting mixture was stirred for 1 h at the same temperature. Next, a solution of the freshly prepared aldehyde **22** in dry  $\text{Et}_2\text{O}$  (2 mL) was added dropwisely to the vinyl lithium solution, the reaction was stirred for 1 h at  $-78^\circ\text{C}$ , and 16 h at  $-60^\circ\text{C}$  (cryostat bath). The reaction was quenched by addition of  $\text{NH}_4\text{Cl}$  saturated solution (10 mL), and was extracted with  $\text{EtOAc}$  (2 x 10 mL). The combined organic phases were dried over anhydrous  $\text{MgSO}_4$ , and concentrated under reduced pressure. The residue was subjected to flash chromatography ( $\text{SiO}_2$ , hexanes/ $\text{EtOAc}$  90:10) to furnish alcohol **23** (27.0 mg, 56  $\mu\text{mol}$ ) as a colorless oil in 45% yield.

**Note:** Analysis of a crude sample showed dr = 3:1, after chromatography the alcohol **23** was obtained as a single isomer in 45% yield. Substitution of  $n\text{-BuLi}$  by  $t\text{-BuLi}$  led to 25% yield of alcohol **23** and the same dr = 3:1 (crude sample). The analyses were performed with  $\text{CHCl}_3$  or  $\text{CDCl}_3$  treated with anhydrous  $\text{K}_2\text{CO}_3$  to remove residual acidity, in order to prevent decomposition.  $n\text{-BuLi}$  and  $t\text{-BuLi}$  were recently titrated using cyclohexanol (75 mg, 0.75 mmol) diluted in dry THF (5 mL), with 2,2'-bipyridine (bipy) as indicator.

**TLC** ( $\text{SiO}_2$ ):  $R_f$  = 0.21 (hexanes/ $\text{EtOAc}$  90:10);



$[\alpha]_{\text{D}}^{25} = +16$  ( $c$  1.0,  $\text{CHCl}_3$ ),  $[\alpha]_{\text{D, lit}}^{20} = +19.2$  ( $c$  1.6,  $\text{CHCl}_3$ );<sup>6</sup>

**$^1\text{H}$  NMR** (250 MHz,  $\text{CDCl}_3$ ):  $\delta$  0.76 (s, 3H), 0.86 (s, 3H), 0.88 (s, 3H), 0.79-1.04 (m, 1H), 1.58 (d,  $J = 1.1$  Hz, 3H), 1.69 (s, 3H), 1.05-1.73 (m, 11H), 1.73-2.07 (m, 6H), 2.21 (td,  $J = 12.8, 4.5$  Hz, 1H), 2.43-2.71 (m, 2H), 2.86 (q,  $J = 5.6$  Hz, 1H), 3.78 (s, 3H), 3.79 (s, 3H), 4.76 (dd,  $J = 8.2, 4.9$  Hz, 1H), 5.30 (dq,  $J = 8.2, 0.9$  Hz, 1H), 5.39 (br. s, 1H), 6.32 (d,  $J = 2.4$  Hz, 1H), 6.48 (d,  $J = 2.4$  Hz, 1H);

**$^{13}\text{C}$  NMR** (62.9 MHz,  $\text{CDCl}_3$ ):  $\delta$  13.5 ( $\text{CH}_3$ ), 16.8 ( $\text{CH}_3$ ), 18.8 ( $\text{CH}_2$ ), 20.2 ( $\text{CH}_2$ ), 21.8 ( $\text{CH}_3$ ), 22.2 ( $\text{CH}_3$ ), 22.6 ( $\text{CH}_2$ ), 23.4 ( $\text{CH}_2$ ), 23.8 ( $\text{CH}_2$ ), 25.6 ( $\text{CH}_2$ ), 33.0 (C), 33.1 ( $\text{CH}_3$ ), 36.8 (C), 39.2 ( $\text{CH}_2$ ), 42.3 ( $2\text{CH}_2$ ), 44.2 (CH), 50.2 (CH), 54.6 (CH), 55.3 ( $2\text{CH}_3$ ), 71.6 (CH), 96.0 (CH), 104.6 (CH), 120.3 (C), 122.3 (CH), 125.8 (CH), 135.3 (C), 138.5 (C), 138.9 (C), 158.1 ( $2\text{C}$ ).

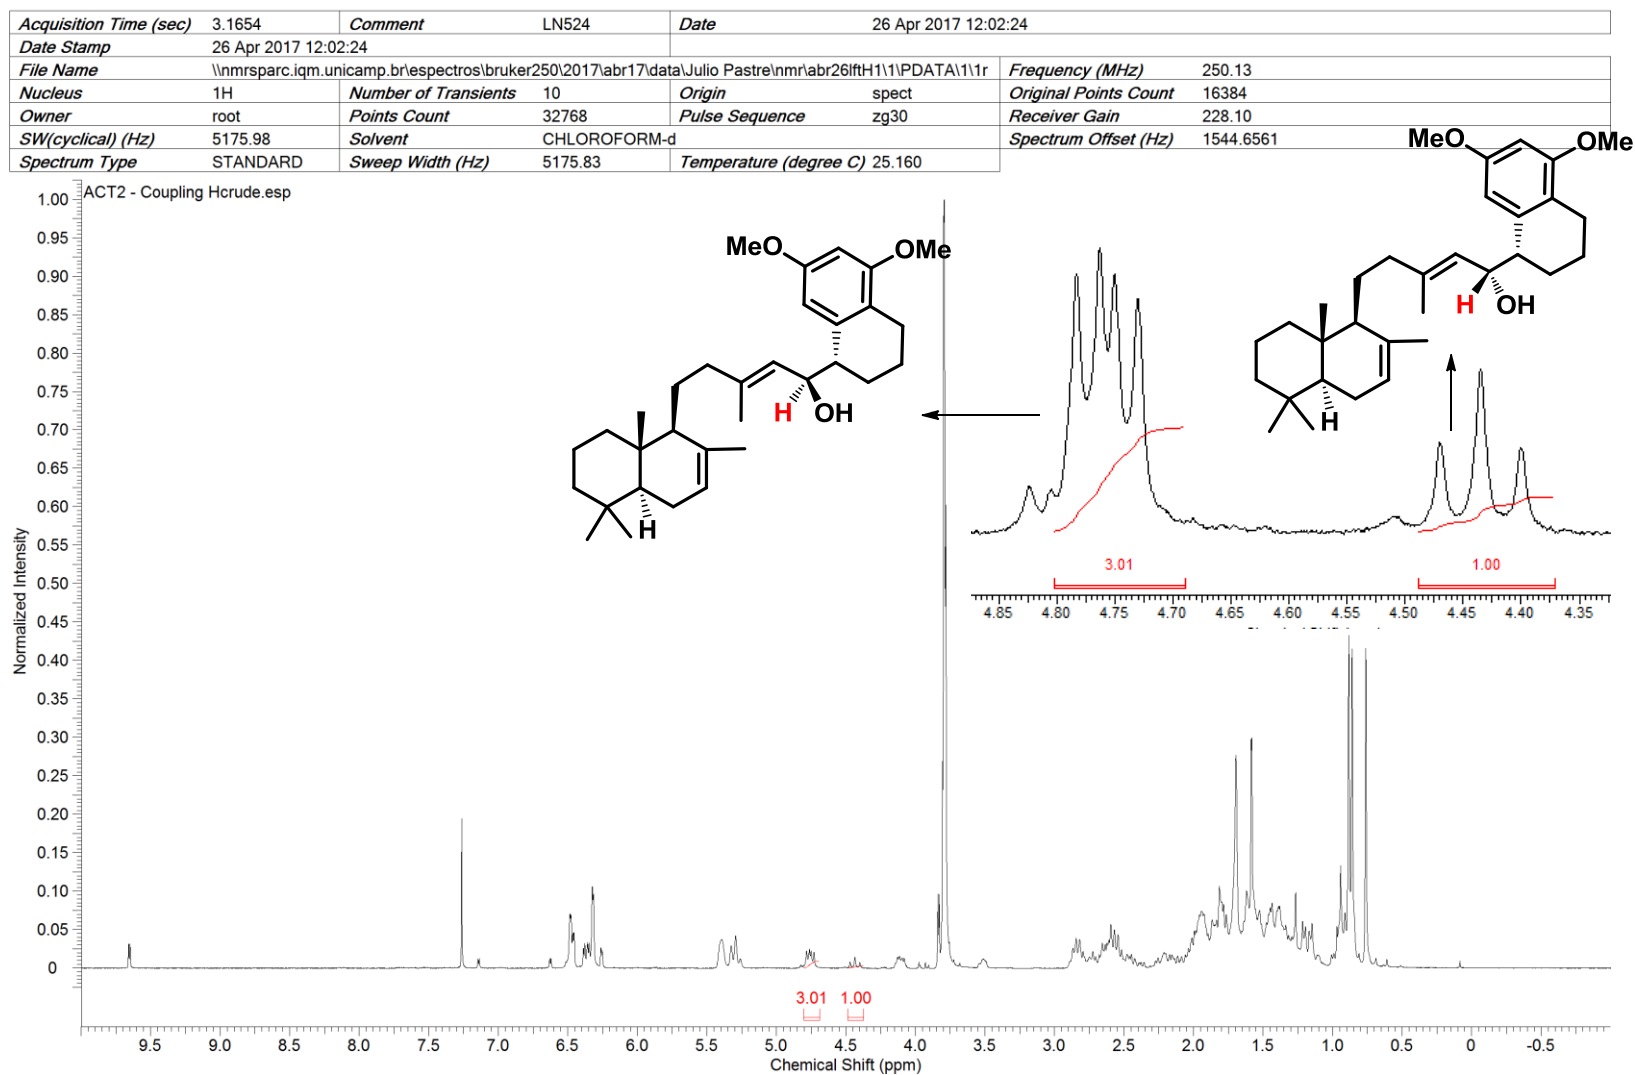

**Figure S66.**  $^1\text{H}$  NMR spectrum ( $\text{CDCl}_3$ , 250 MHz) of crude mixture (**dr** = 3:1).

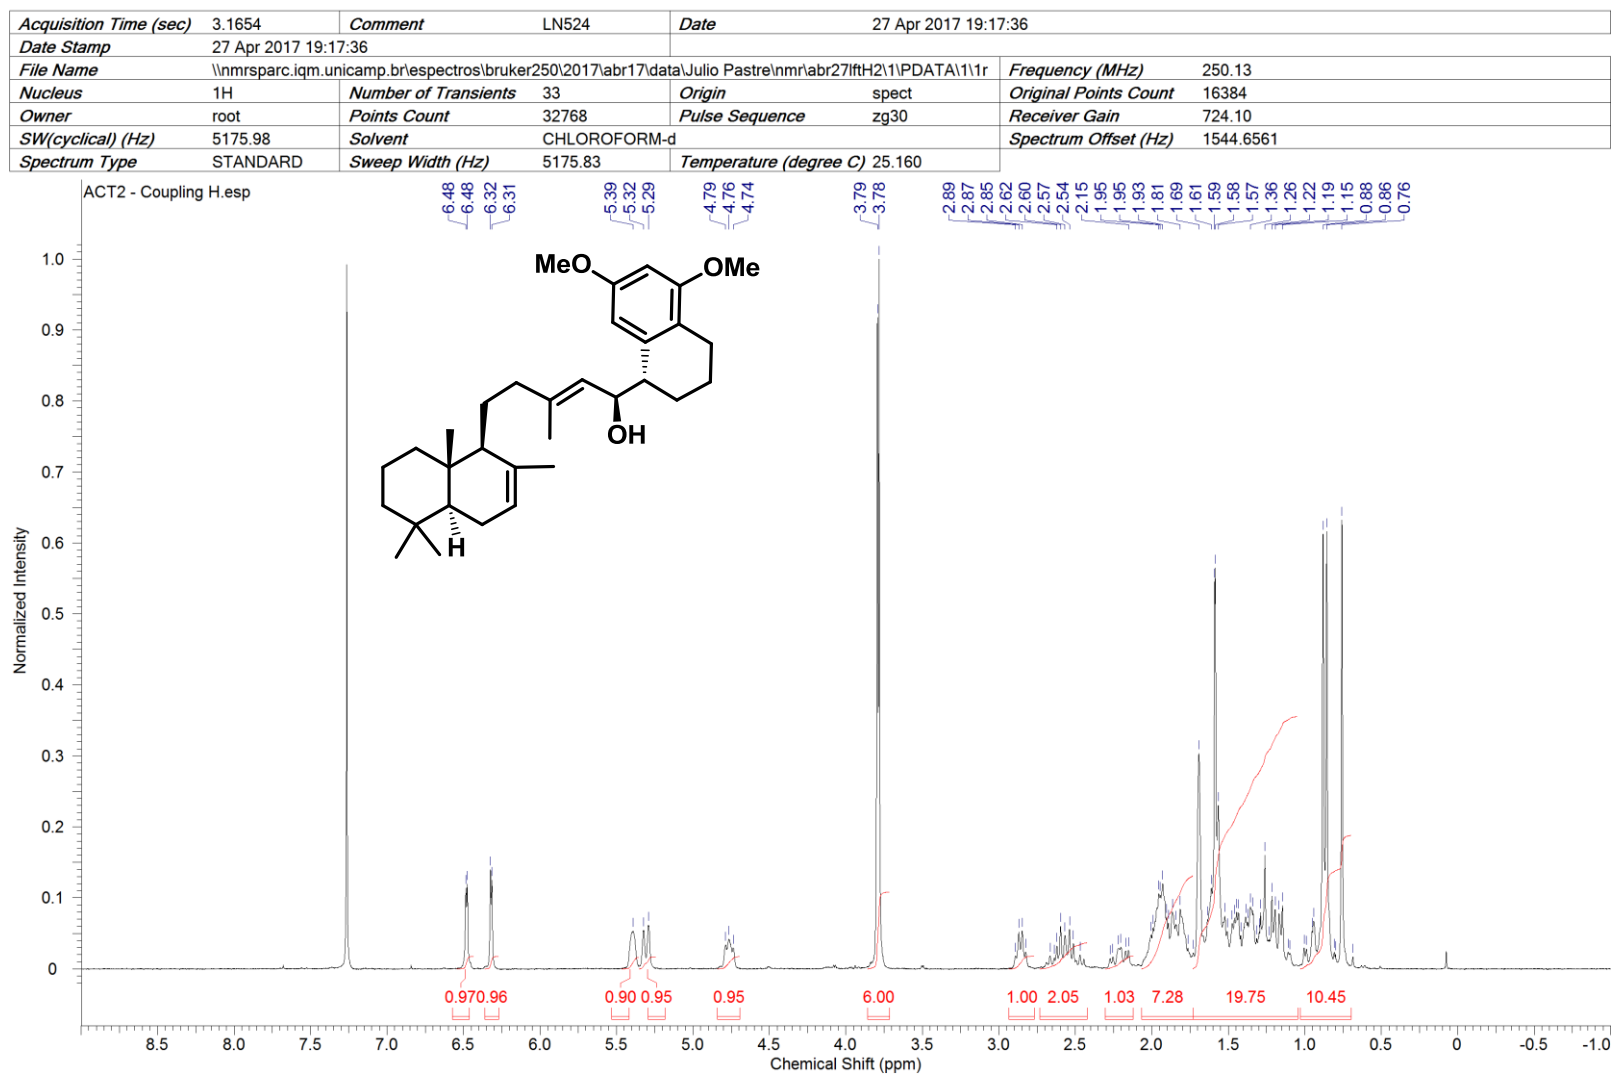

**Figure S67.**  $^1\text{H}$  NMR spectrum ( $\text{CDCl}_3$ , 250 MHz) of compound **23**.

|                        |                                                                                                       |                      |              |                        |                      |                       |           |
|------------------------|-------------------------------------------------------------------------------------------------------|----------------------|--------------|------------------------|----------------------|-----------------------|-----------|
| Acquisition Time (sec) | 1.0879                                                                                                | Comment              | LN524        | Date                   | 27 Apr 2017 19:43:12 |                       |           |
| Date Stamp             | 27 Apr 2017 19:43:12                                                                                  |                      |              |                        |                      |                       |           |
| File Name              | \\nmrsparc.iqm.unicamp.br\spectros\bruker250\2017\abr17\data\Julio Pastre\nmr\abr27\ftH2\3\PDATA\1\1r |                      |              | Frequency (MHz)        | 62.90                |                       |           |
| Nucleus                | 13C                                                                                                   | Number of Transients | 1002         | Origin                 | spect                | Original Points Count | 16384     |
| Owner                  | root                                                                                                  | Points Count         | 32768        | Pulse Sequence         | zgpg30               | Receiver Gain         | 574.70    |
| SW(cyclical) (Hz)      | 15060.24                                                                                              | Solvent              | CHLOROFORM-d | Spectrum Offset (Hz)   |                      |                       | 6289.9907 |
| Spectrum Type          | STANDARD                                                                                              | Sweep Width (Hz)     | 15059.78     | Temperature (degree C) | 25.160               |                       |           |

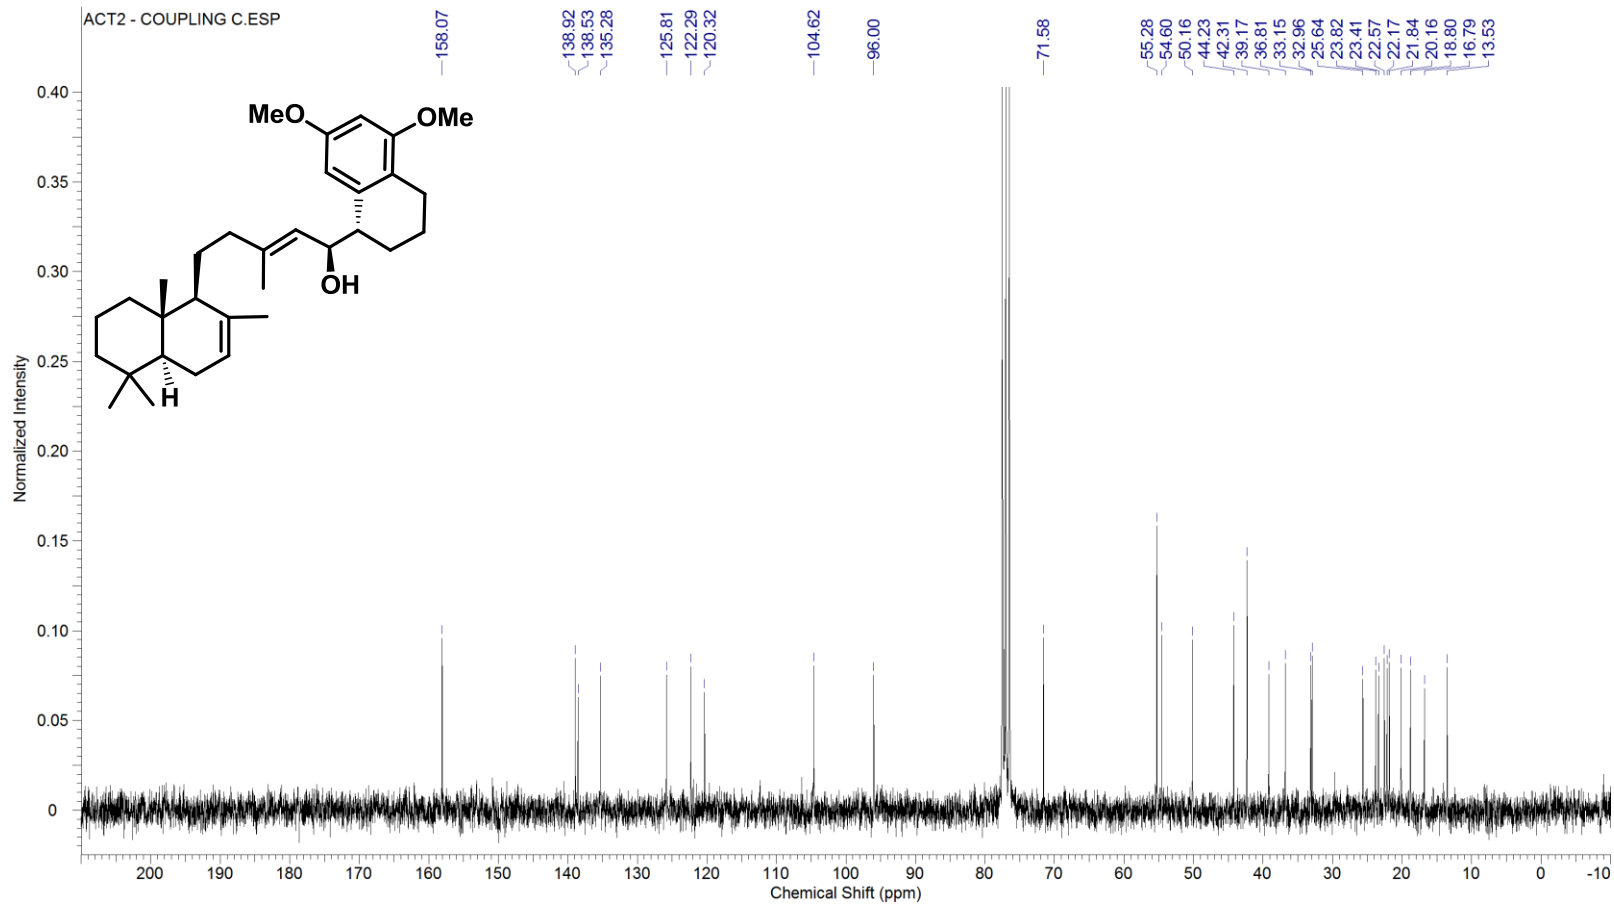

**Figure S68.** <sup>13</sup>C NMR spectrum (CDCl<sub>3</sub>, 62.9 MHz) of compound **23**.

|                        |                                                                                                      |                      |              |                        |                      |                       |           |
|------------------------|------------------------------------------------------------------------------------------------------|----------------------|--------------|------------------------|----------------------|-----------------------|-----------|
| Acquisition Time (sec) | 0.5439                                                                                               | Comment              | LN524        | Date                   | 27 Apr 2017 19:26:08 |                       |           |
| Date Stamp             | 27 Apr 2017 19:26:08                                                                                 |                      |              |                        |                      |                       |           |
| File Name              | \\nmrparc.lqm.unicamp.br\spectros\bruker250\2017\abr17\data\Julio Pastre\nmr\abr27\ftH2\2\PDATA\1\1r |                      |              |                        | Frequency (MHz)      | 62.90                 |           |
| Nucleus                | 13C                                                                                                  | Number of Transients | 444          | Origin                 | spect                | Original Points Count | 8192      |
| Owner                  | root                                                                                                 | Points Count         | 32768        | Pulse Sequence         | dept135              | Receiver Gain         | 16384.00  |
| SW(cyclical) (Hz)      | 15060.24                                                                                             | Solvent              | CHLOROFORM-d | Spectrum Offset (Hz)   |                      |                       | 6289.0518 |
| Spectrum Type          | DEPT135                                                                                              | Sweep Width (Hz)     | 15059.78     | Temperature (degree C) | 25.160               |                       |           |

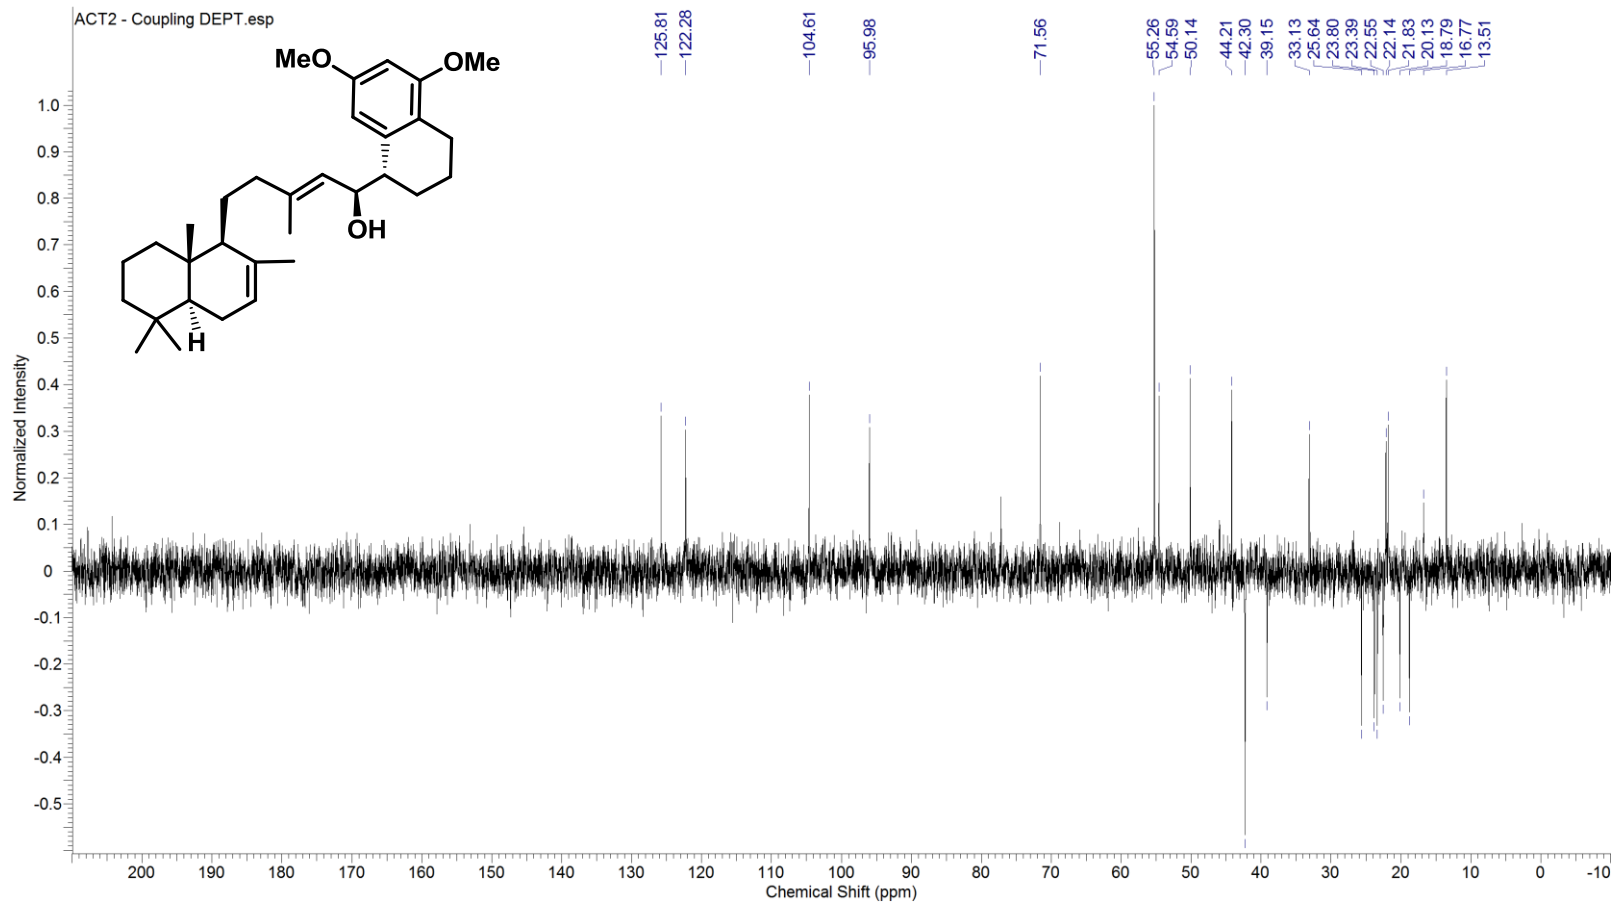

**Figure S69.** DEPT 135 NMR spectrum (CDCl<sub>3</sub>, 62.9 MHz) of compound **23**.

**Table 3.** Comparison between  $^{13}\text{C}$  NMR spectra of compound **23** and reported by Xu and Ye<sup>5</sup>

| Pastre (this work)       | Xu and Ye <sup>5</sup>   | $\Delta\delta$ |
|--------------------------|--------------------------|----------------|
| 13.5                     | 13.5                     | 0.0            |
| 16.8                     | 16.8                     | 0.0            |
| 18.8                     | 18.8                     | 0.0            |
| 20.2                     | 20.1                     | +0.1           |
| 21.8                     | 21.8                     | 0.0            |
| 22.2                     | 22.1                     | +0.1           |
| 22.6                     | 22.6                     | 0.0            |
| 23.4                     | 23.5                     | -0.1           |
| 23.8                     | 23.8                     | 0.0            |
| 25.6                     | 25.6                     | 0.0            |
| 33.0                     | 33.0                     | 0.0            |
| 33.1                     | 33.1                     | 0.0            |
| 36.8                     | 36.8                     | 0.0            |
| 39.2                     | 39.2                     | 0.0            |
| 42.3                     | 42.3                     | 0.0            |
| 42.3                     | 42.4                     | -0.1           |
| 44.2                     | 44.3                     | -0.1           |
| 50.2                     | 50.2                     | 0.0            |
| 54.6                     | 54.7                     | -0.1           |
| 55.3 (2CH <sub>3</sub> ) | 55.3 (2CH <sub>3</sub> ) | 0.0            |
| -                        | 67.9*                    | -              |
| 71.6                     | 71.6                     | 0.0            |
| 96.0                     | 96.1                     | -0.1           |
| 104.6                    | 104.8                    | -0.2           |
| 120.3                    | 120.3                    | 0.0            |
| 122.3                    | 122.3                    | 0.0            |
| 125.8                    | 125.9                    | -0.1           |
| 135.3                    | 135.3                    | 0.0            |
| 138.5                    | 138.6                    | -0.1           |
| 138.9                    | 138.9                    | 0.0            |
| 158.1 (2C)               | 158.1 (2C)               | 0.0            |

\*Misassigned signal, probably referent to THF as impurity. Signal at 25.6 ppm is common to THF and **23**. Such impurity can also be seen in the  $^1\text{H}$  NMR spectrum.<sup>5</sup>

$^{13}\text{C}$  NMR of THF in  $\text{CDCl}_3$ : 25.62 ( $\text{CH}_2$ ) and 67.97 ( $\text{CH}_2\text{O}$ )<sup>7</sup>

<sup>7</sup> Gottlieb, H. E.; Kotlyar, V.; Nudelman, A. *J. Org. Chem.* **1997**, 62, 7512-7515.

**(*E*)-3-methyl-5-((1*S*,4*aS*,8*aS*)-2,5,5,8*a*-tetramethyl-1,4,4*a*,5,6,7,8,8*a*-octahydronaphthalen-1-yl)pent-2-en-1-ol (**24**).**

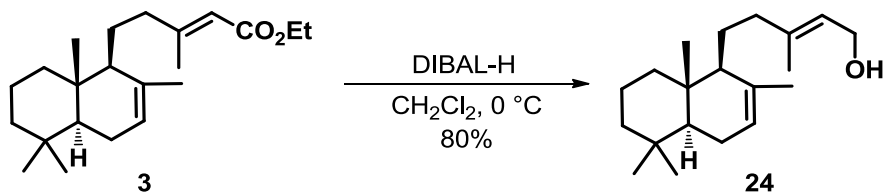

A freshly prepared solution of DIBAL-H (1.0 M in CH<sub>2</sub>Cl<sub>2</sub>, 215  $\mu$ L, 215  $\mu$ mol, 5 equiv) was added to a solution of ester **3** (14.3 mg, 43  $\mu$ mol, 1 equiv) in dry CH<sub>2</sub>Cl<sub>2</sub> (2 mL) at 0  $^\circ$ C. After stirring the reaction for 1 h at 0  $^\circ$ C, Et<sub>2</sub>O (10 mL) and saturated aqueous solution of Rochelle's salt were added, and the reaction was vigorously stirred for 30 min at 0  $^\circ$ C and 1 h at room temperature. After separation of phases, the aqueous layer was extracted with Et<sub>2</sub>O (10 mL). The organic phases were combined, dried over anhydrous MgSO<sub>4</sub> and concentrated under reduced pressure. The residue was subjected to flash chromatography (SiO<sub>2</sub>, hexanes/EtOAc 97:3 to 90:10) to afford the alcohol **24** (10 mg, 34  $\mu$ mol) as a colorless oil in 80% yield.

**TLC (SiO<sub>2</sub>):** R<sub>f</sub> = 0.27 (hexanes/EtOAc 90:10);

$[\alpha]_{\text{D}}^{25} = +5$  (*c* 0.5, CHCl<sub>3</sub>),  $[\alpha]_{\text{D, lit}}^{25} = +12$  (*c* 0.690, CHCl<sub>3</sub>);<sup>8</sup>

**<sup>1</sup>H NMR** (250 MHz, CDCl<sub>3</sub>):  $\delta$  0.76 (s, 3H), 0.86 (s, 3H), 0.88 (s, 3H), 0.80-1.04 (m, 2H), 1.56 (s, 3H), 1.69 (s, 3H), 1.05-2.09 (m, 12H), 2.13-2.31 (m, 1H), 4.09-4.20 (m, 2H), 5.33-5.47 (m, 2H);

**<sup>13</sup>C NMR** (62.9 MHz, CDCl<sub>3</sub>):  $\delta$  13.5 (CH<sub>3</sub>), 16.4 (CH<sub>3</sub>), 18.8 (CH<sub>2</sub>), 21.8 (CH<sub>3</sub>), 22.2 (CH<sub>3</sub>), 23.8 (CH<sub>2</sub>), 25.6 (CH<sub>2</sub>), 32.9 (C), 33.1 (CH<sub>3</sub>), 36.8 (C), 39.1 (CH<sub>2</sub>), 42.0 (CH<sub>2</sub>), 42.3 (CH<sub>2</sub>), 50.1 (CH), 54.4 (CH), 59.4 (CH<sub>2</sub>), 122.3 (CH), 123.3 (CH), 135.2 (C), 140.4 (C).

<sup>8</sup> Suzuki, H.; Noma, M.; Kawashima, N. *Phytochemistry*, **1983**, 22, 1294-1295.

|                        |                                                                                                      |                      |              |                               |                      |                       |                      |           |
|------------------------|------------------------------------------------------------------------------------------------------|----------------------|--------------|-------------------------------|----------------------|-----------------------|----------------------|-----------|
| Acquisition Time (sec) | 3.1654                                                                                               | Comment              | LN256A       | Date                          | 31 Aug 2016 09:03:12 |                       |                      |           |
| Date Stamp             | 31 Aug 2016 09:03:12                                                                                 |                      |              |                               |                      |                       |                      |           |
| File Name              | \\nmrparc.lqm.unicamp.br\spectros\bruker250\2016\ago16\data\Julio Pastre\nmr\ago31\ftH2\1\PDATA\1\1r |                      |              |                               | Frequency (MHz)      | 250.13                |                      |           |
| Nucleus                | 1H                                                                                                   | Number of Transients | 43           | Origin                        | spect                | Original Points Count | 16384                |           |
| Owner                  | root                                                                                                 | Points Count         | 32768        | Pulse Sequence                | zg30                 | Receiver Gain         | 2048.00              |           |
| SW(cyclical) (Hz)      | 5175.98                                                                                              | Solvent              | CHLOROFORM-d | Temperature (degree C) 25.160 |                      |                       | Spectrum Offset (Hz) | 1544.6561 |
| Spectrum Type          | STANDARD                                                                                             | Sweep Width (Hz)     | 5175.83      |                               |                      |                       |                      |           |

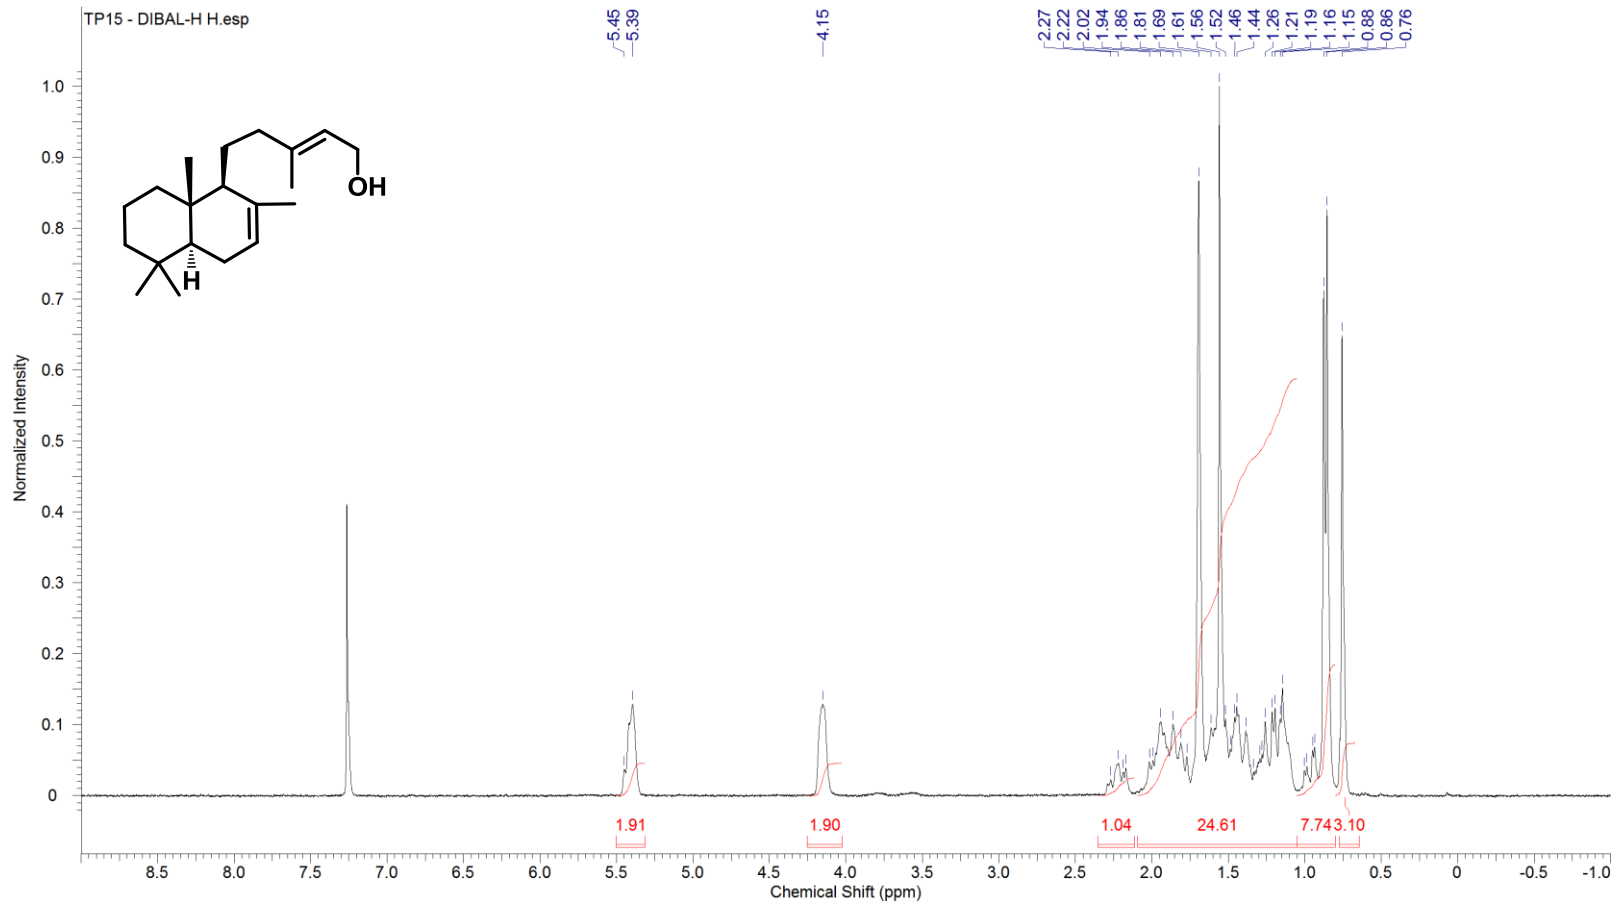

**Figure S70.** <sup>1</sup>H NMR spectrum (CDCl<sub>3</sub>, 250 MHz) of compound **24**.



|                        |                                                                                                       |                      |              |                      |                      |                       |           |
|------------------------|-------------------------------------------------------------------------------------------------------|----------------------|--------------|----------------------|----------------------|-----------------------|-----------|
| Acquisition Time (sec) | 1.0879                                                                                                | Comment              | LN256        | Date                 | 01 Sep 2016 07:05:52 |                       |           |
| Date Stamp             | 01 Sep 2016 07:05:52                                                                                  |                      |              |                      |                      |                       |           |
| File Name              | \\nmrsparc.lqm.unicamp.br\spectros\bruker250\2016\ago16\data\Julio Pastre\nmr\ago31\ftH6\3\PDATA\1\1r |                      |              |                      | Frequency (MHz)      | 62.90                 |           |
| Nucleus                | <sup>13</sup> C                                                                                       | Number of Transients | 10240        | Origin               | spect                | Original Points Count | 16384     |
| Owner                  | root                                                                                                  | Points Count         | 32768        | Pulse Sequence       | zgpg30               | Receiver Gain         | 574.70    |
| SW(cyclical) (Hz)      | 15060.24                                                                                              | Solvent              | CHLOROFORM-d | Spectrum Offset (Hz) |                      |                       | 6289.0518 |
| Spectrum Type          | STANDARD                                                                                              | Sweep Width (Hz)     | 15059.78     |                      |                      |                       |           |

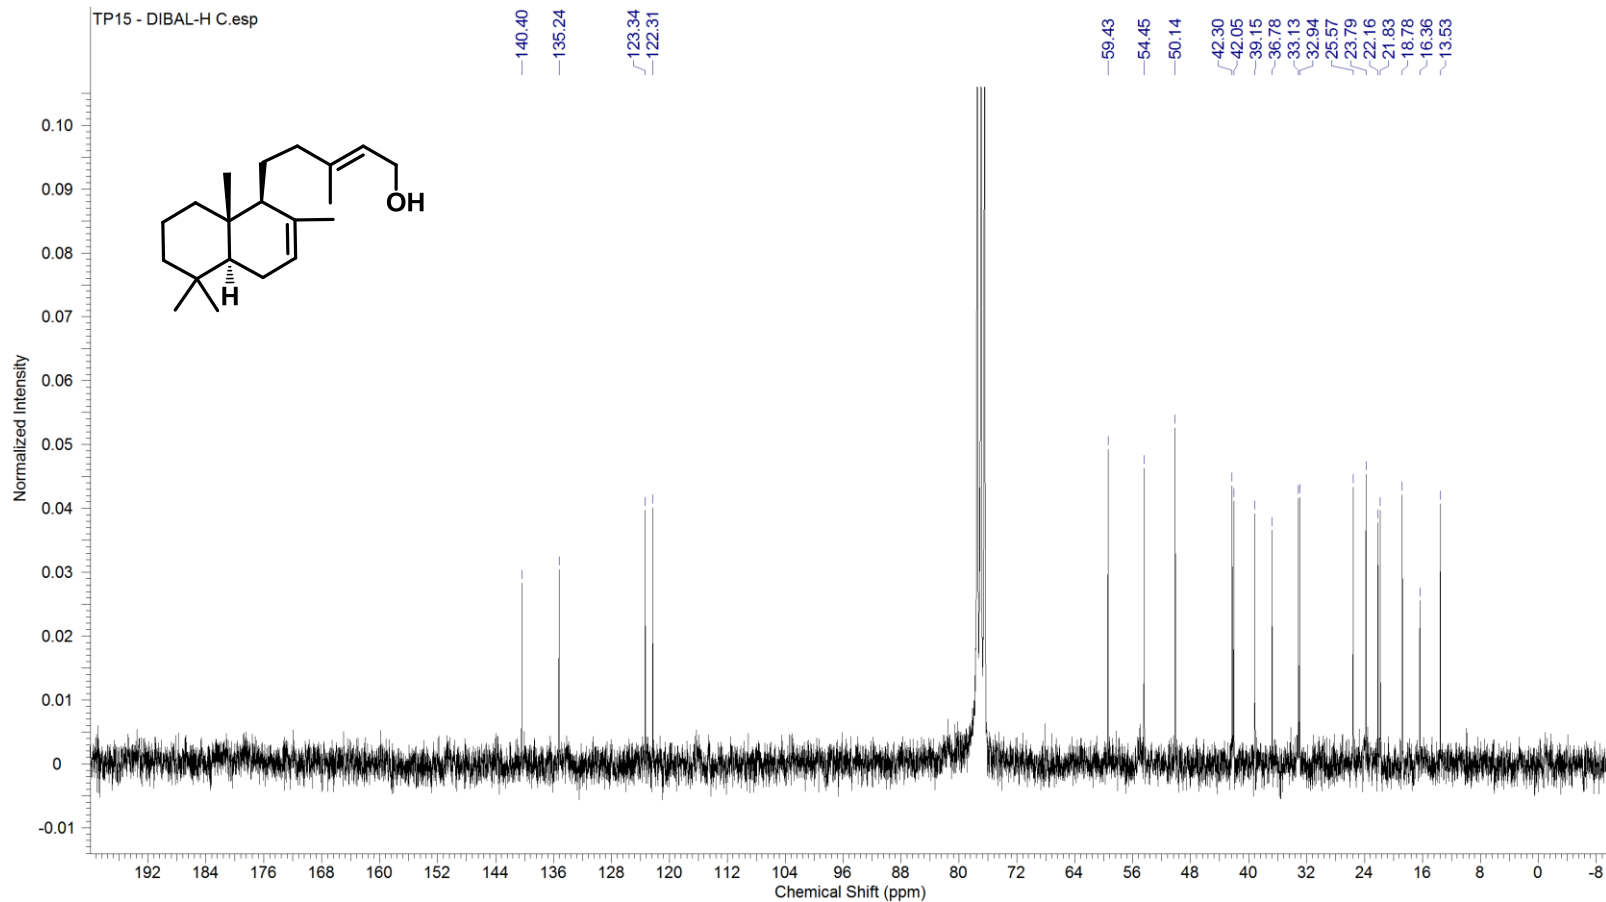

**Figure S71.** <sup>13</sup>C NMR spectrum (CDCl<sub>3</sub>, 62.9 MHz) of compound **24**.

|                        |                      |              |                 |                      |                                                                 |                            |
|------------------------|----------------------|--------------|-----------------|----------------------|-----------------------------------------------------------------|----------------------------|
| Acquisition Time (sec) | 0.5439               | Comment      | LN256           | Date                 | 31 Aug 2016 21:57:36                                            |                            |
| Date Stamp             | 31 Aug 2016 21:57:36 |              |                 | File Name            | C:\Users\Luiz\Desktop\Luiz\PhD\NMR\ago16\ago31ftH6\2\PDATA\1\1r |                            |
| Frequency (MHz)        | 62.90                | Nucleus      | <sup>13</sup> C | Number of Transients | 1024                                                            | Origin spect               |
| Owner                  | root                 | Points Count | 32768           | Pulse Sequence       | dept135                                                         | Receiver Gain 724.10       |
| Solvent                | CHLOROFORM-d         |              |                 | Spectrum Offset (Hz) | 6289.0518                                                       | Spectrum Type DEPT135      |
| Temperature (degree C) | 25.160               |              |                 |                      |                                                                 | SW(cyclical) (Hz) 15060.24 |
|                        |                      |              |                 |                      |                                                                 | Sweep Width (Hz) 15059.78  |

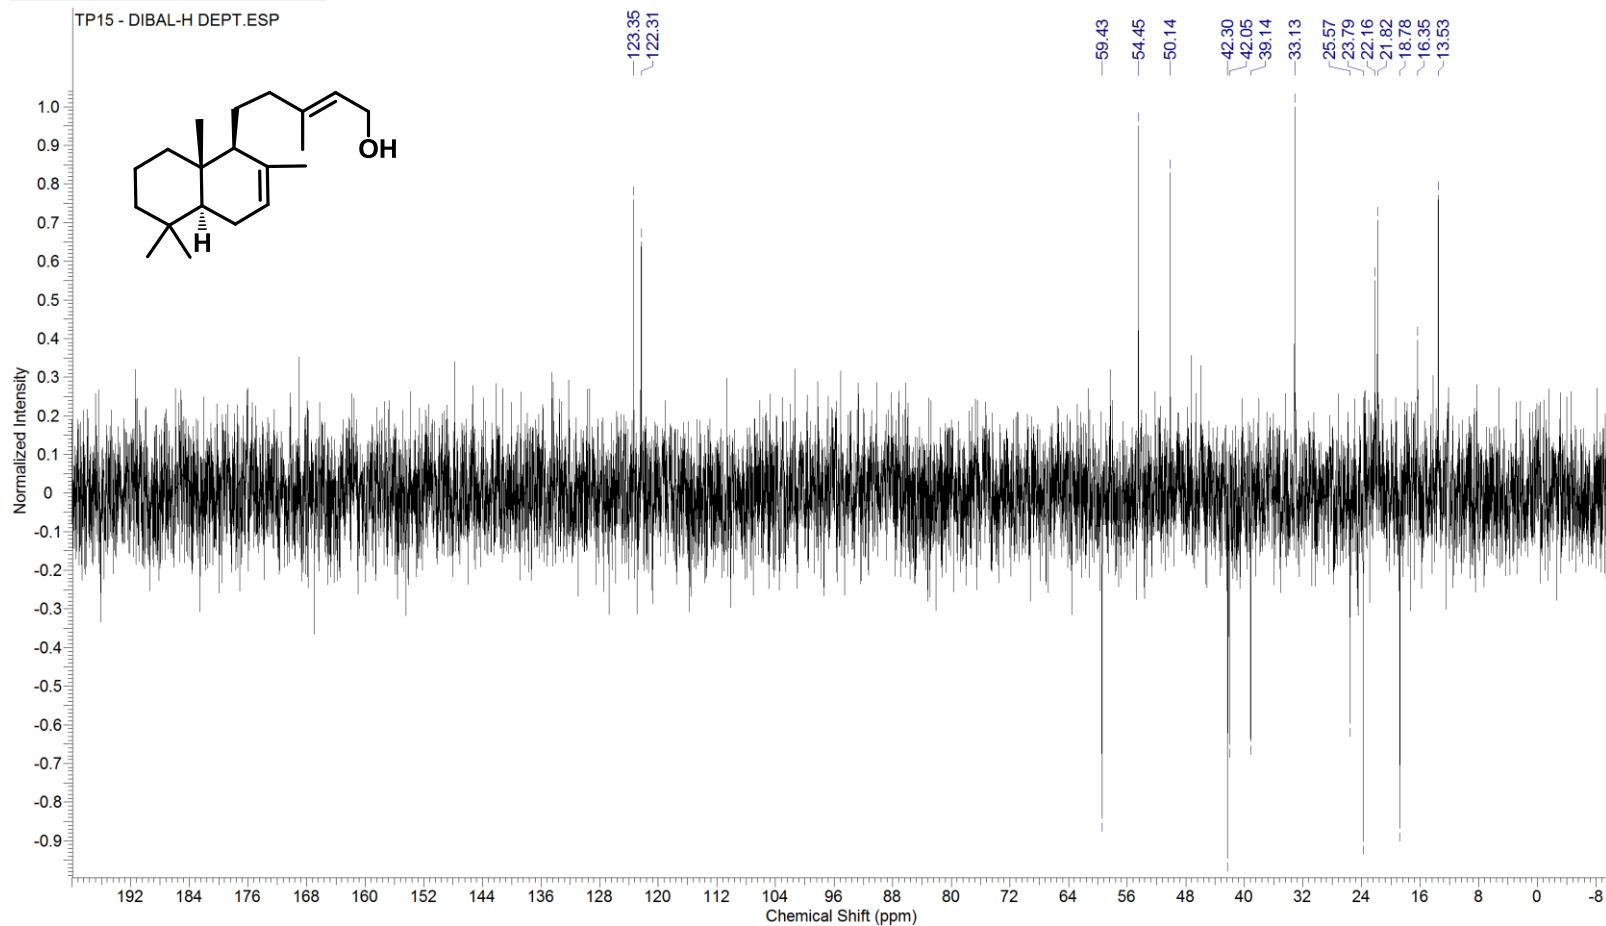

**Figure S72.** DEPT 135 NMR spectrum (CDCl<sub>3</sub>, 62.9 MHz) of compound **24**.

**Table 4.** Comparison between  $^{13}\text{C}$  NMR spectra of compound  $\lambda^7,13\text{-(E)}$ -dien-15-ol (**24**) and reported by Kawashima and co-workers<sup>8</sup>

| Pastre (this work) | Kawashima <sup>8</sup> | $\Delta\delta$ |
|--------------------|------------------------|----------------|
| 13.5               | 13.5                   | 0.0            |
| 16.4               | 16.3                   | +0.1           |
| 18.8               | 18.8                   | -0.1           |
| 21.8               | 21.9                   | 0.0            |
| 22.2               | 22.2                   | 0.0            |
| 23.8               | 23.8                   | 0.0            |
| 25.6               | 25.6                   | 0.0            |
| 32.9               | 32.9                   | 0.0            |
| 33.1               | 33.2                   | -0.1           |
| 36.8               | 36.7                   | +0.1           |
| 39.1               | 39.2                   | -0.1           |
| 42.0               | 42.2                   | -0.2           |
| 42.3               | 42.3                   | 0.0            |
| 50.1               | 50.1                   | 0.0            |
| 54.4               | 54.5                   | -0.1           |
| 59.4               | 59.0                   | +0.4           |
| 122.3              | 122.3                  | 0.0            |
| 123.3              | 123.7                  | -0.4           |
| 135.2              | 135.1                  | -0.1           |
| 140.4              | 139.6                  | -0.8           |
